# Supplementary figures and images for: Exploring the Genetic Link between Gut Microbiome and Tendinopathy: A Mendelian Randomization and Bioinformatics Approach
Source: Research Square preprint supplement (doi:10.21203/rs.3.rs-4500031/v1), 2024-06-14

MR Test

Inverse variance weighted

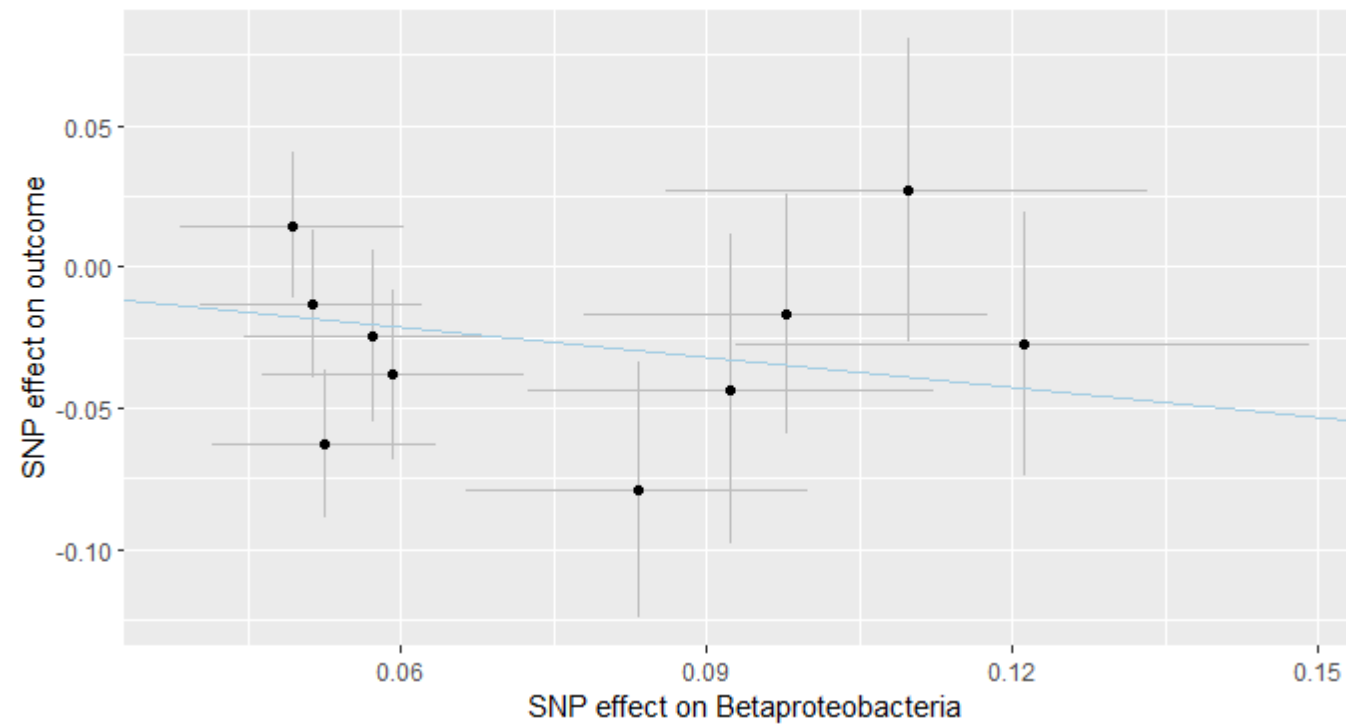

Supplement: Supplementary file 1 [file Betaproteobacteria with AT scatter Rplot.pdf › Supplementary Figure Files 2 scatter plot.zip/Betaproteobacteria with AT scatter Rplot.pdf]

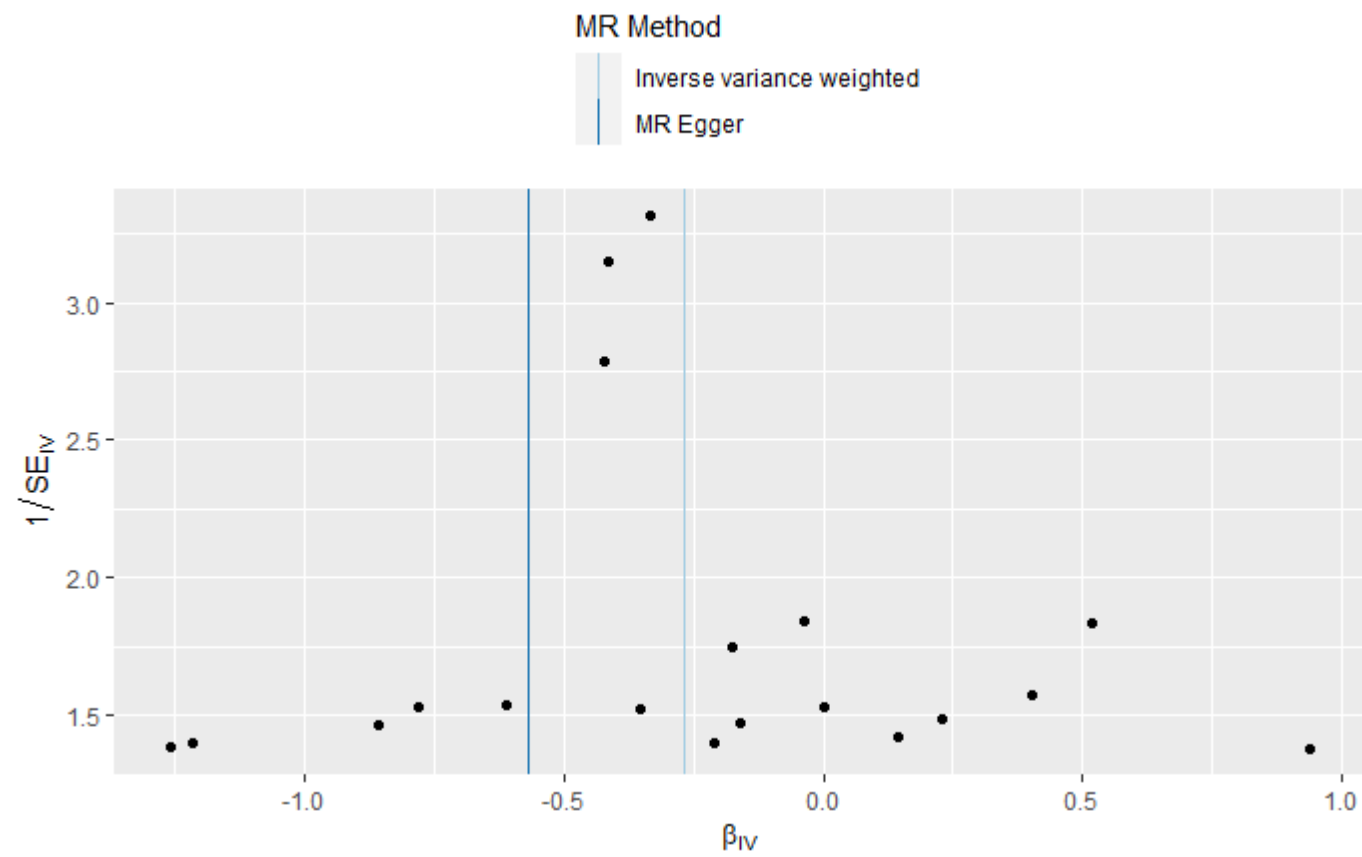

Supplement: Supplementary file 2 [file Bifidobacterium ST funnel.pdf › Supplementary Figure Files 2 scatter plot.zip/Bifidobacterium ST funnel.pdf]

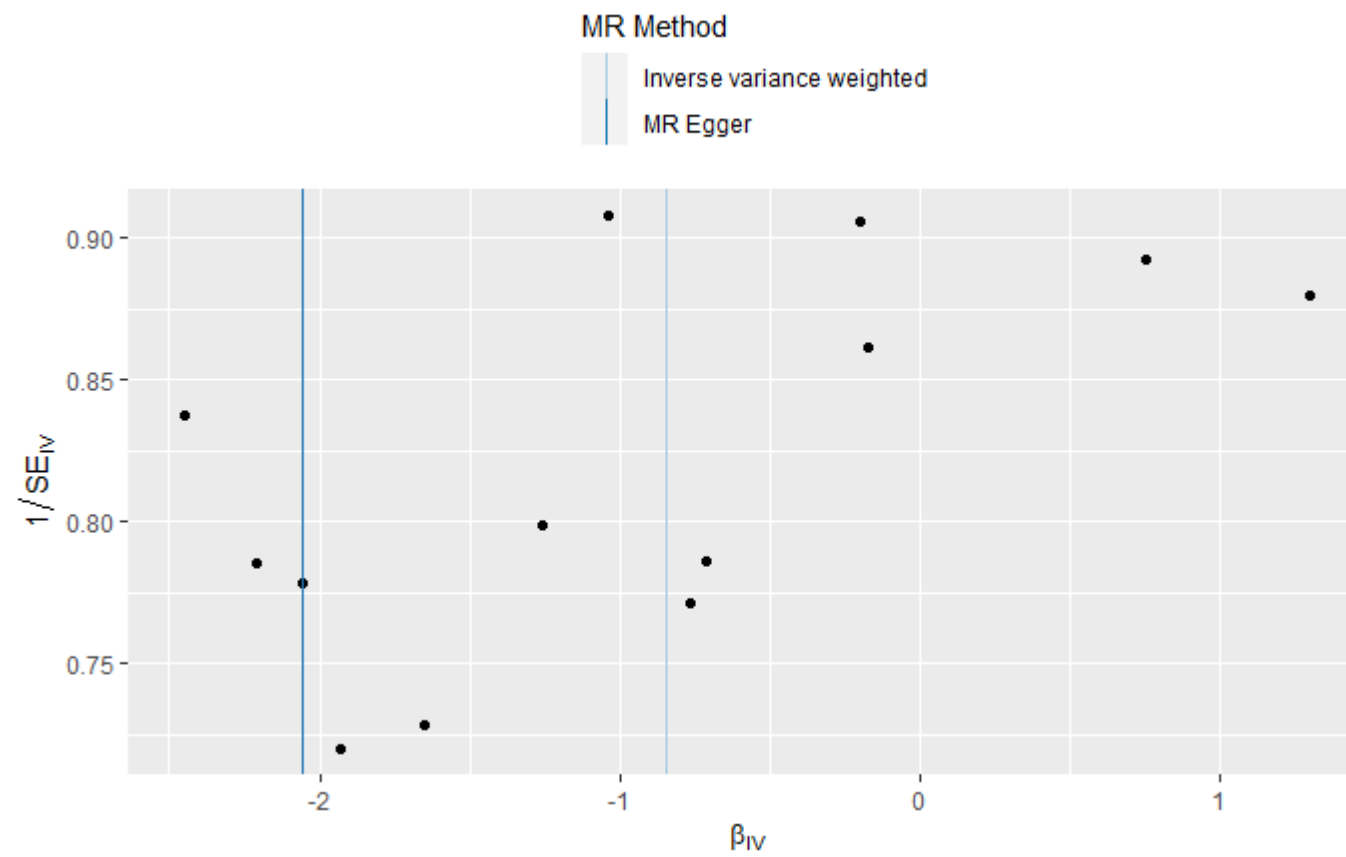

Supplement: Supplementary file 3 [file Bilophila PT funnel.pdf › Supplementary Figure Files 2 scatter plot.zip/Bilophila PT funnel.pdf]

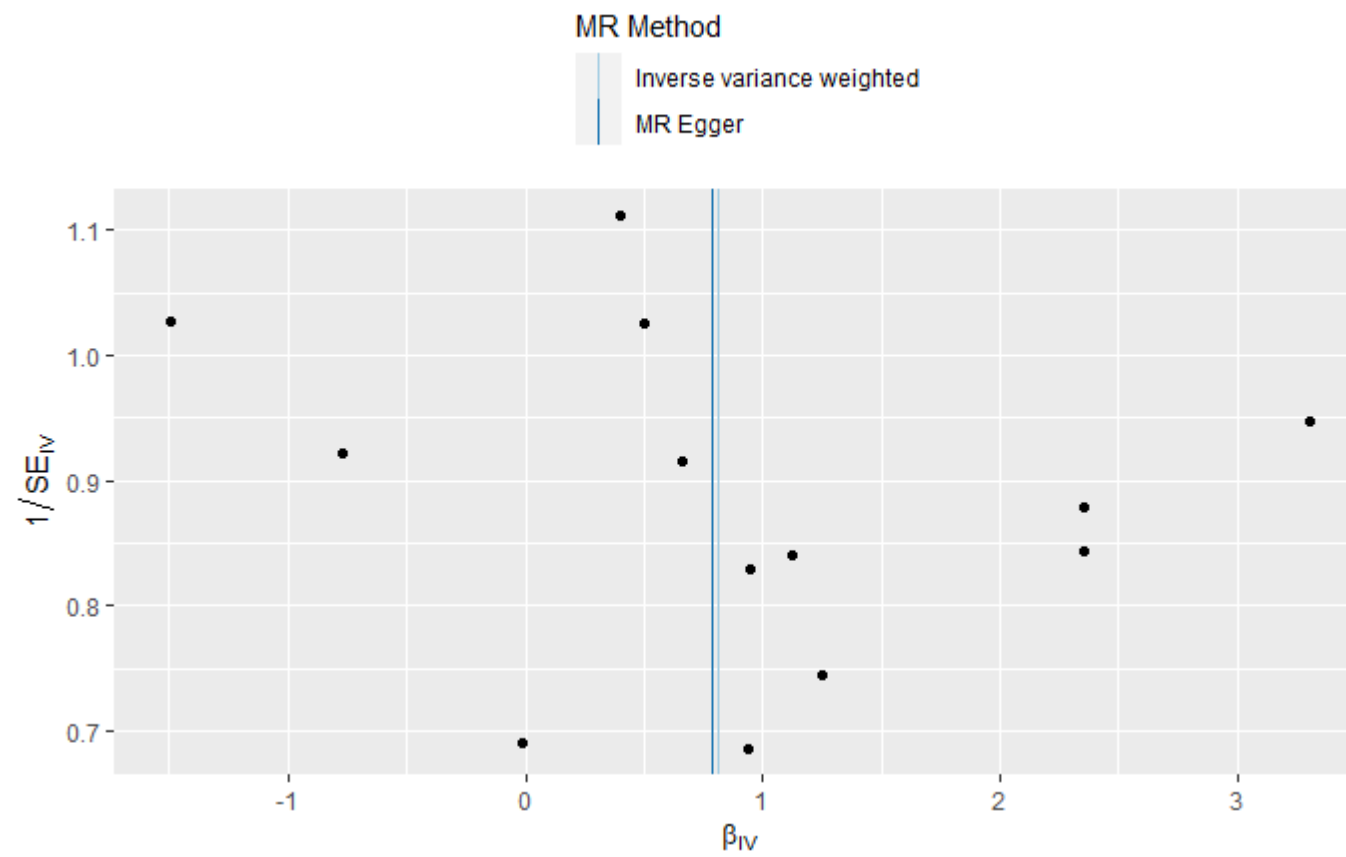

Supplement: Supplementary file 4 [file Butyricimonas PT funnel.pdf › Supplementary Figure Files 2 scatter plot.zip/Butyricimonas PT funnel.pdf]

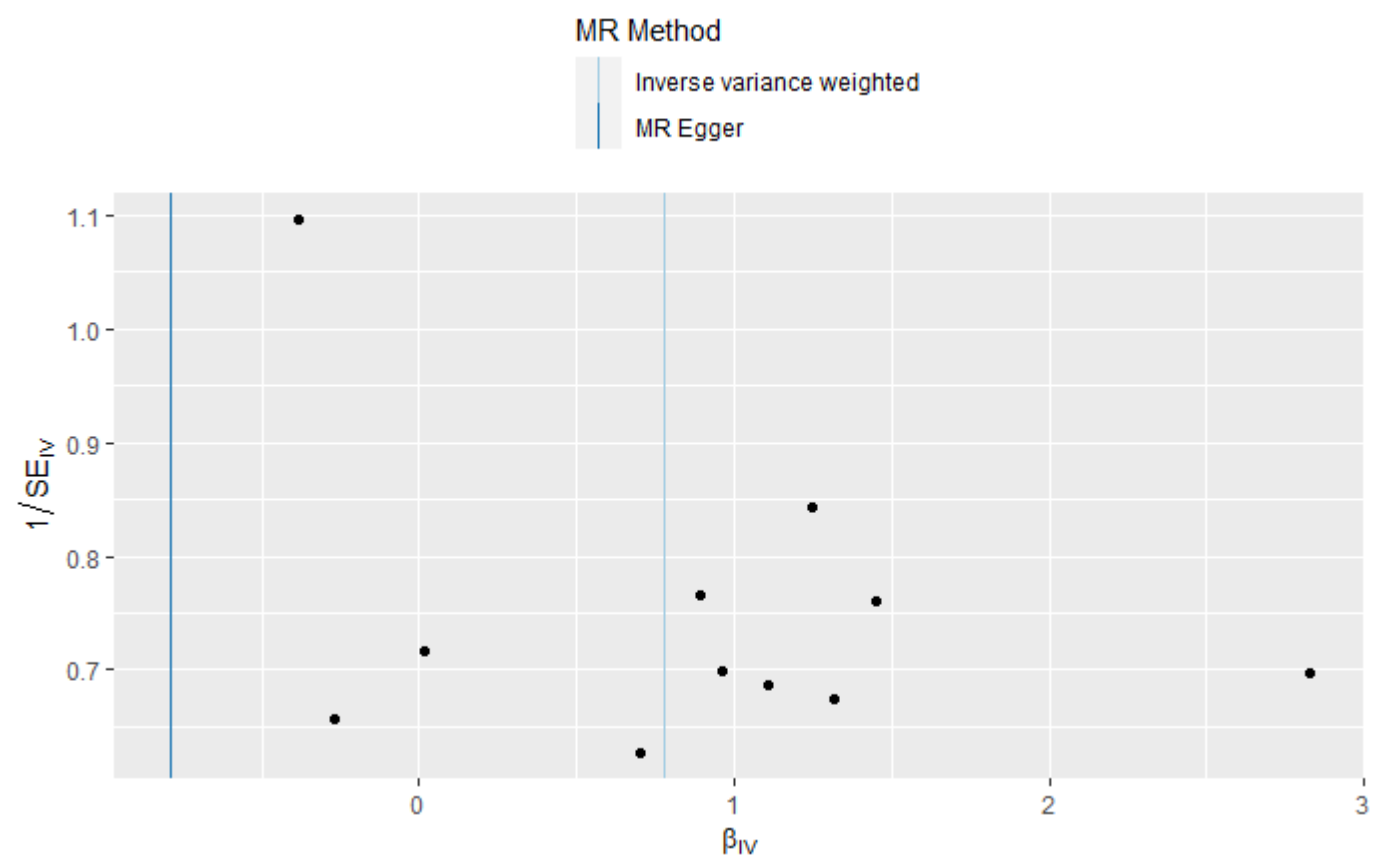

Supplement: Supplementary file 5 [file Clostridia GT funnel.pdf › Supplementary Figure Files 2 scatter plot.zip/Clostridia GT funnel.pdf]

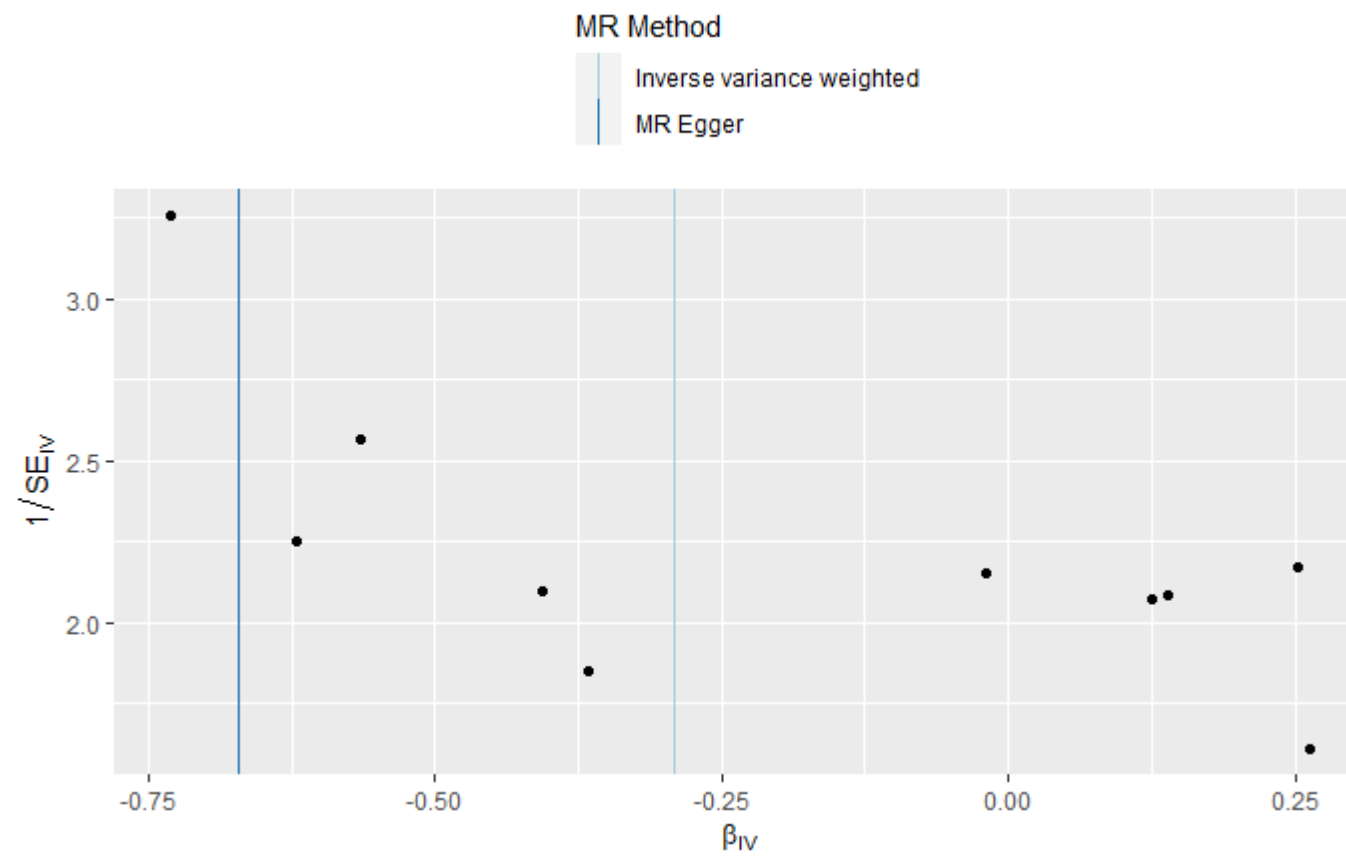

Supplement: Supplementary file 6 [file Clostridiaceae AT funnel.pdf › Supplementary Figure Files 2 scatter plot.zip/Clostridiaceae AT funnel.pdf]

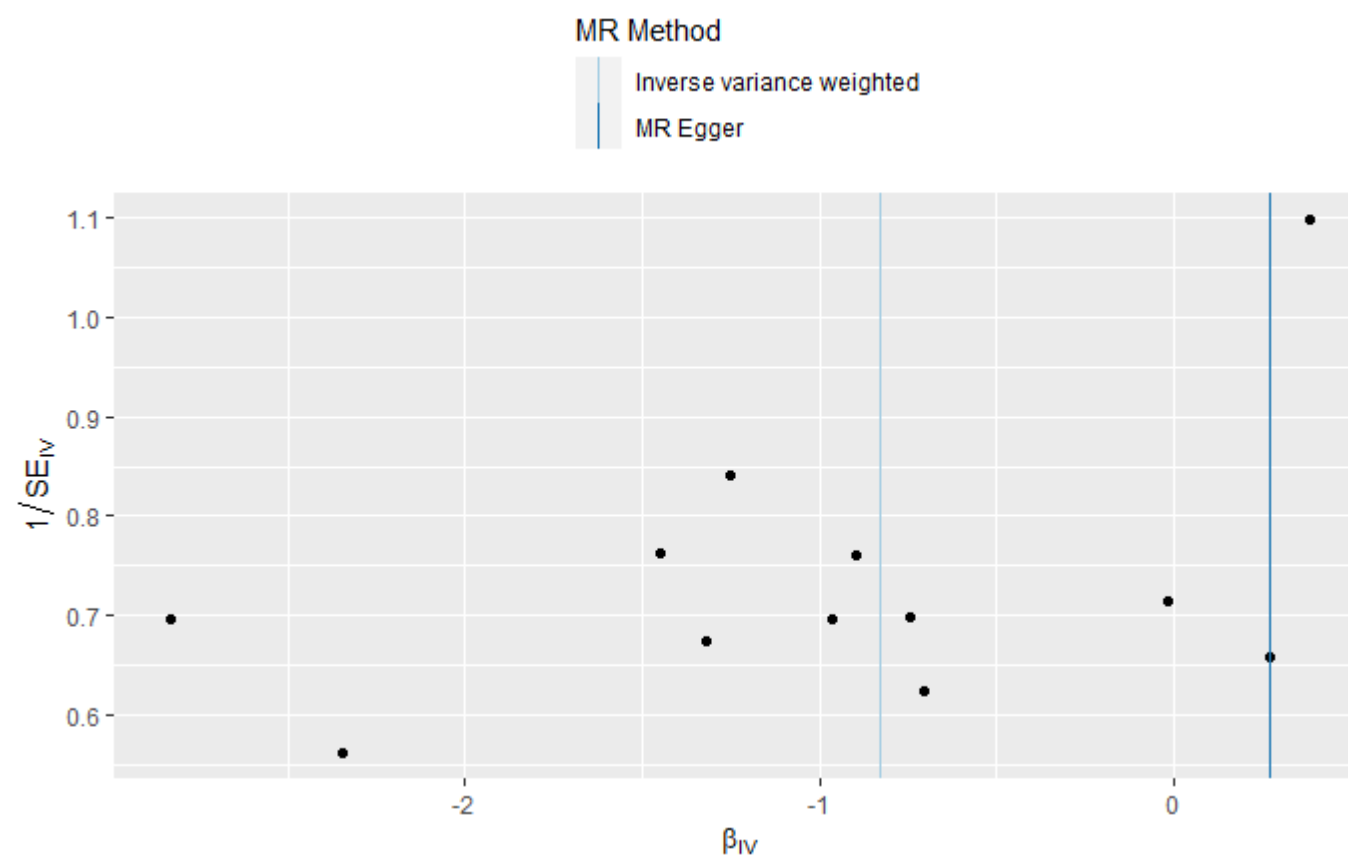

Supplement: Supplementary file 7 [file Clostridiales PT funnel.pdf › Supplementary Figure Files 2 scatter plot.zip/Clostridiales PT funnel.pdf]

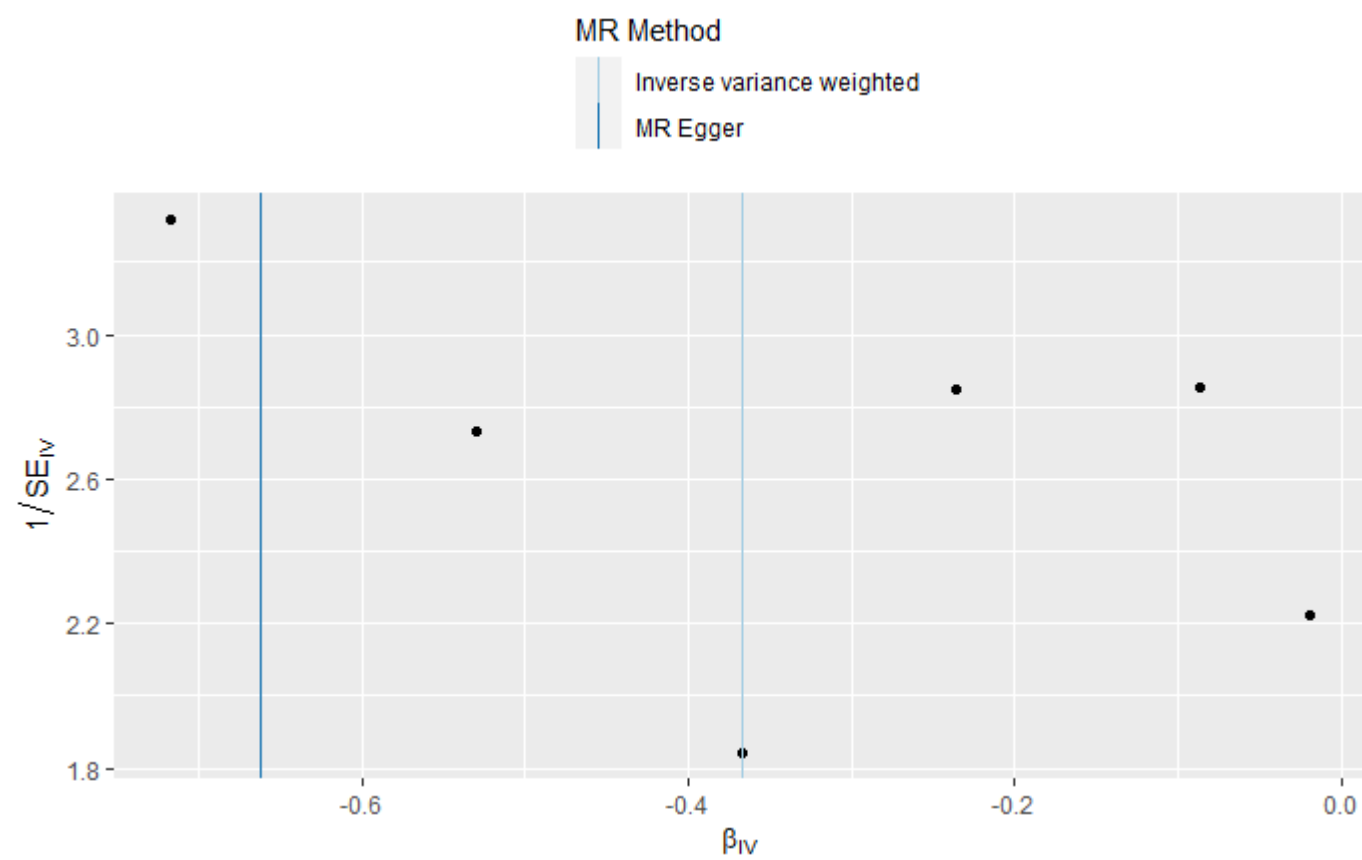

Supplement: Supplementary file 8 [file Clostridiumsensustricto AT funnel.pdf › Supplementary Figure Files 2 scatter plot.zip/Clostridiumsensustricto AT funnel.pdf]

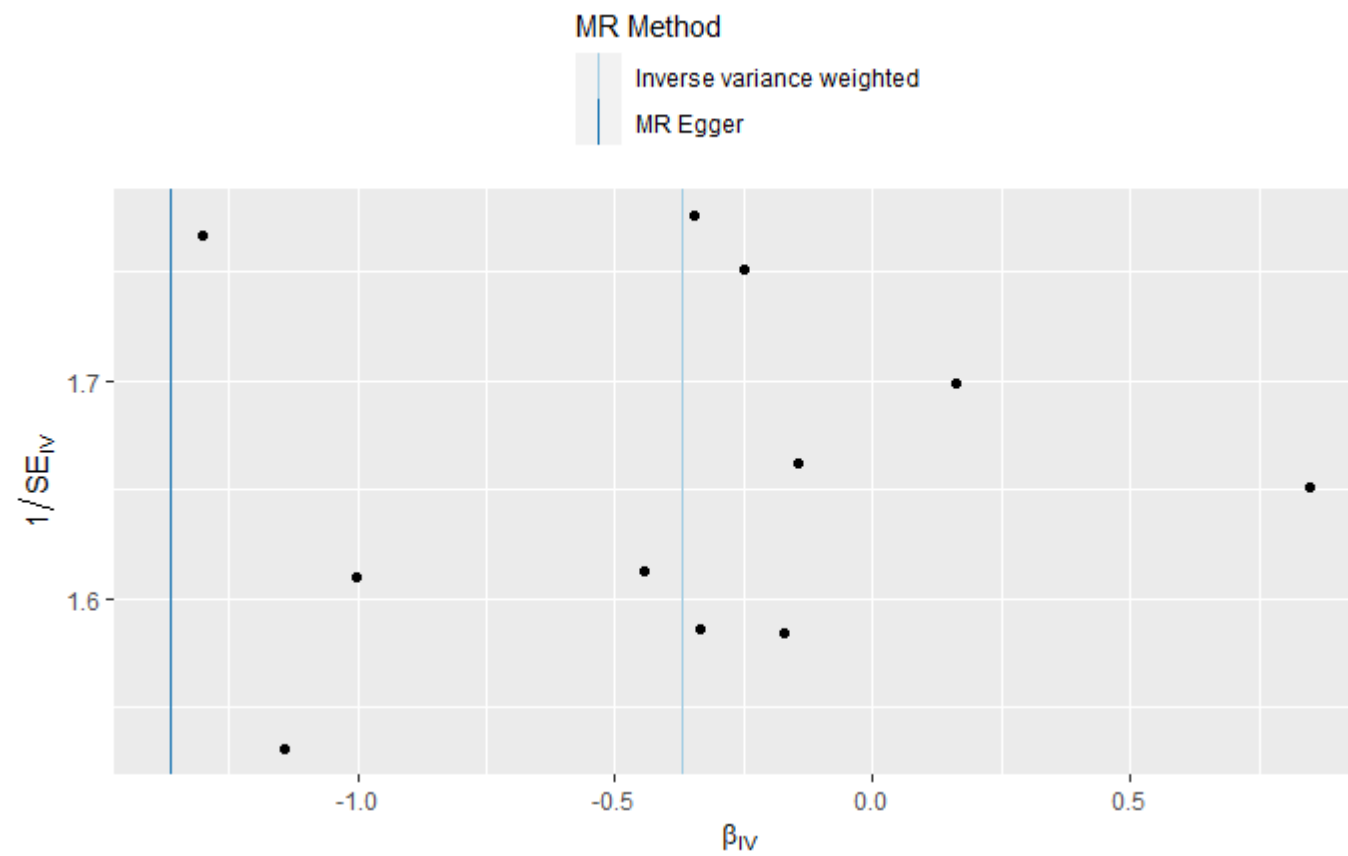

Supplement: Supplementary file 9 [file Coprobacter GT funnel.pdf › Supplementary Figure Files 2 scatter plot.zip/Coprobacter GT funnel.pdf]

### MR Method

- Inverse variance weighted
- MR Egger

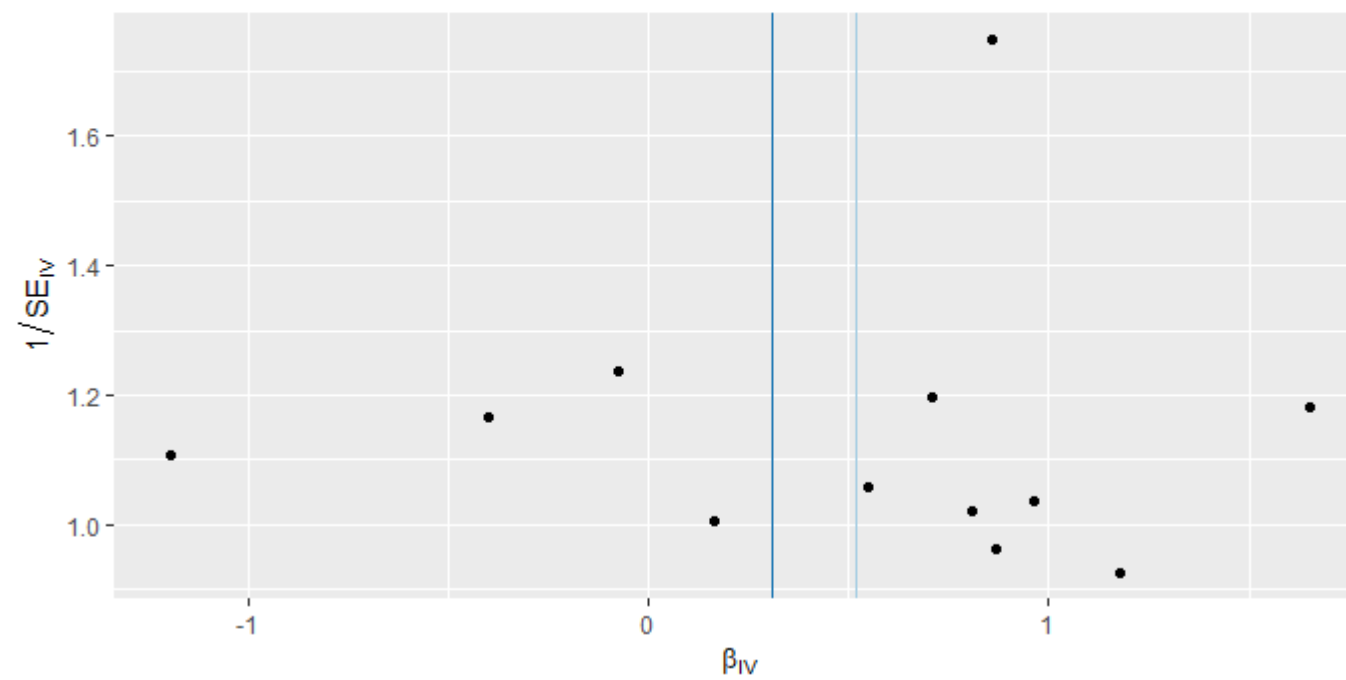

Supplement: Supplementary file 10 [file Coprococcus GT funnel.pdf › Supplementary Figure Files 2 scatter plot.zip/Coprococcus GT funnel.pdf]

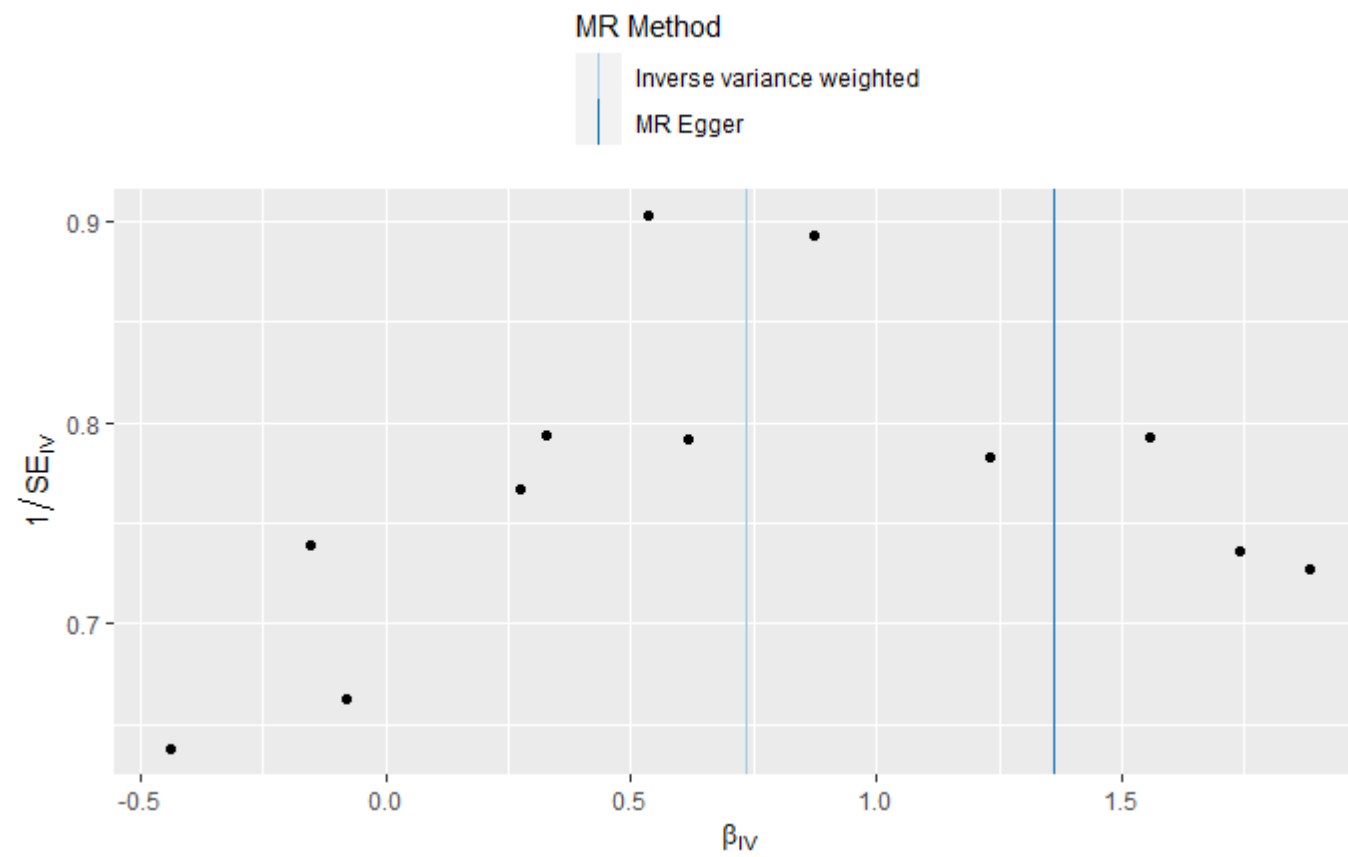

Supplement: Supplementary file 11 [file Deltaproteobacteria GT funnel.pdf › Supplementary Figure Files 2 scatter plot.zip/Deltaproteobacteria GT funnel.pdf]

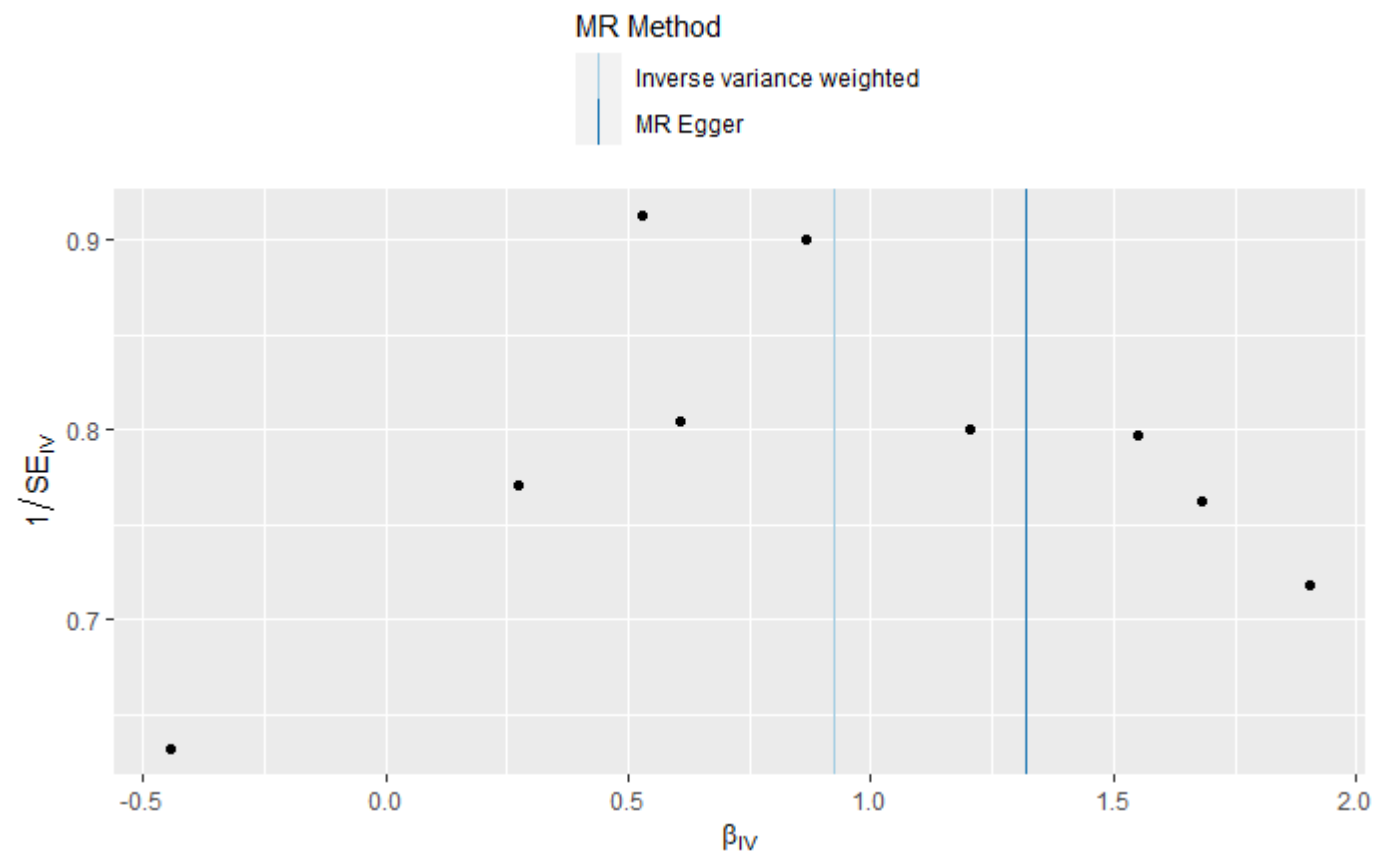

Supplement: Supplementary file 12 [file Desulfovibrionaceae PT funnel.pdf › Supplementary Figure Files 2 scatter plot.zip/Desulfovibrionaceae PT funnel.pdf]

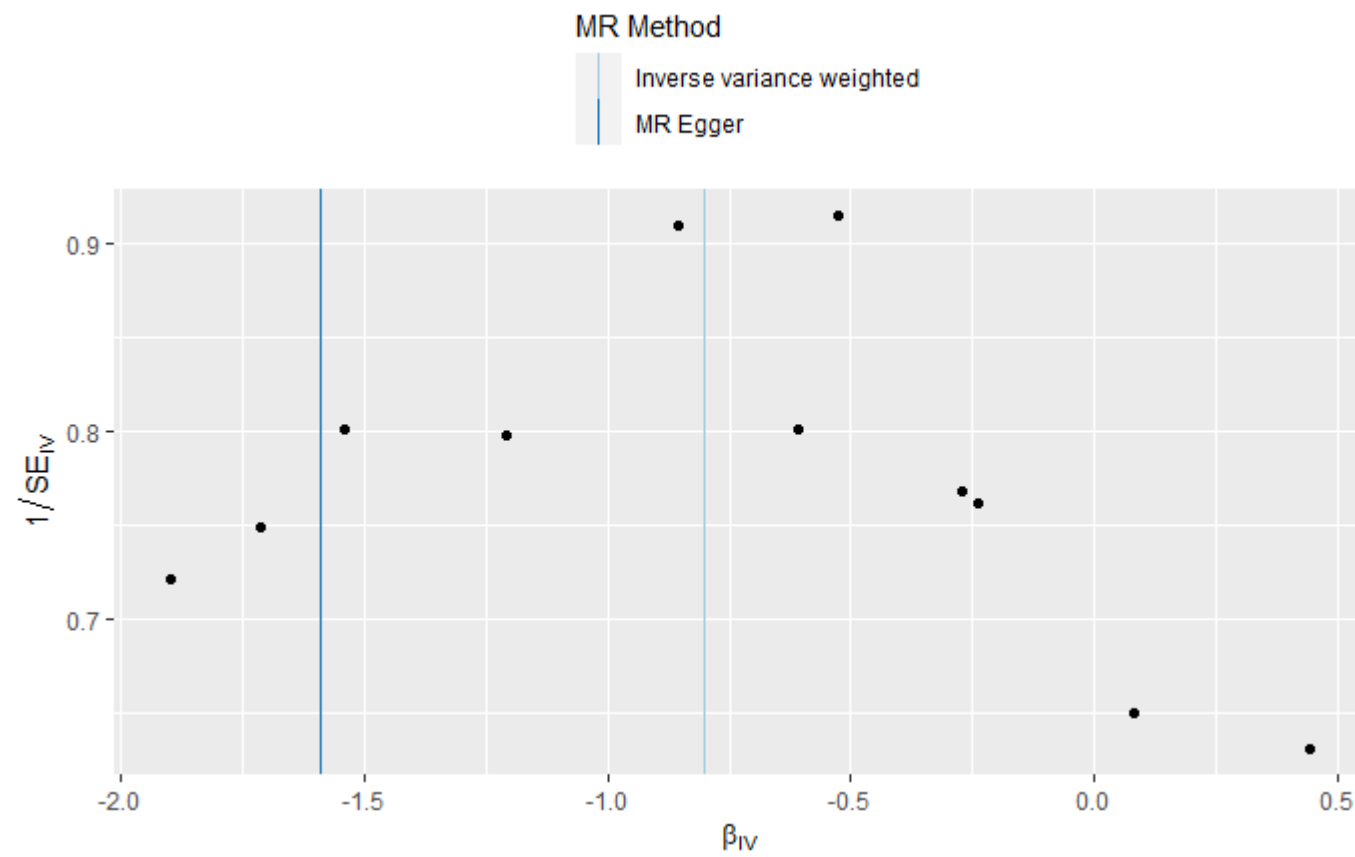

Supplement: Supplementary file 13 [file Desulfovibrionales PT funnel.pdf › Supplementary Figure Files 2 scatter plot.zip/Desulfovibrionales PT funnel.pdf]

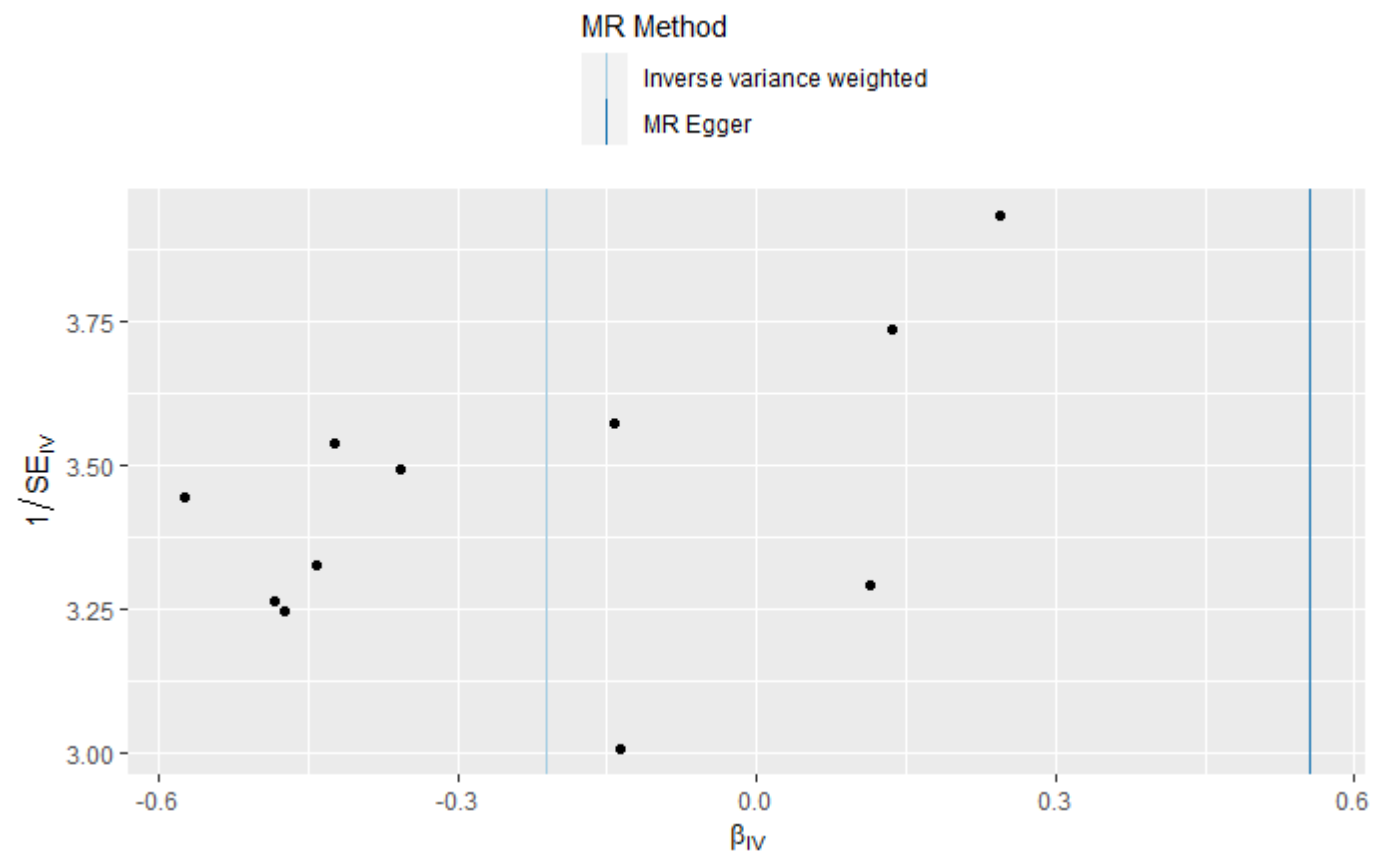

Supplement: Supplementary file 14 [file Eisenbergiella AT funnel.pdf › Supplementary Figure Files 2 scatter plot.zip/Eisenbergiella AT funnel.pdf]

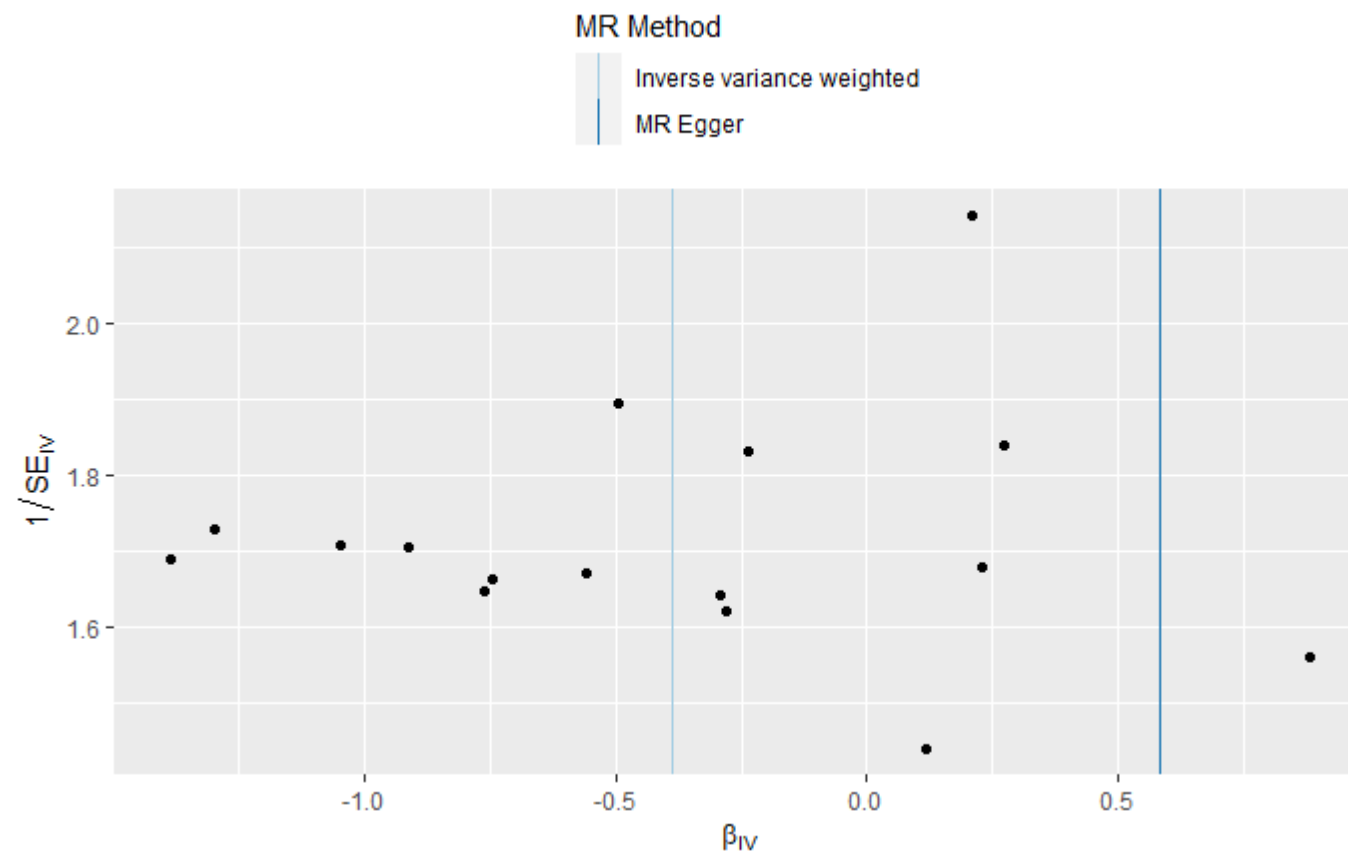

Supplement: Supplementary file 15 [file Erysipelatoclostridium BT funnel.pdf › Supplementary Figure Files 2 scatter plot.zip/Erysipelatoclostridium BT funnel.pdf]

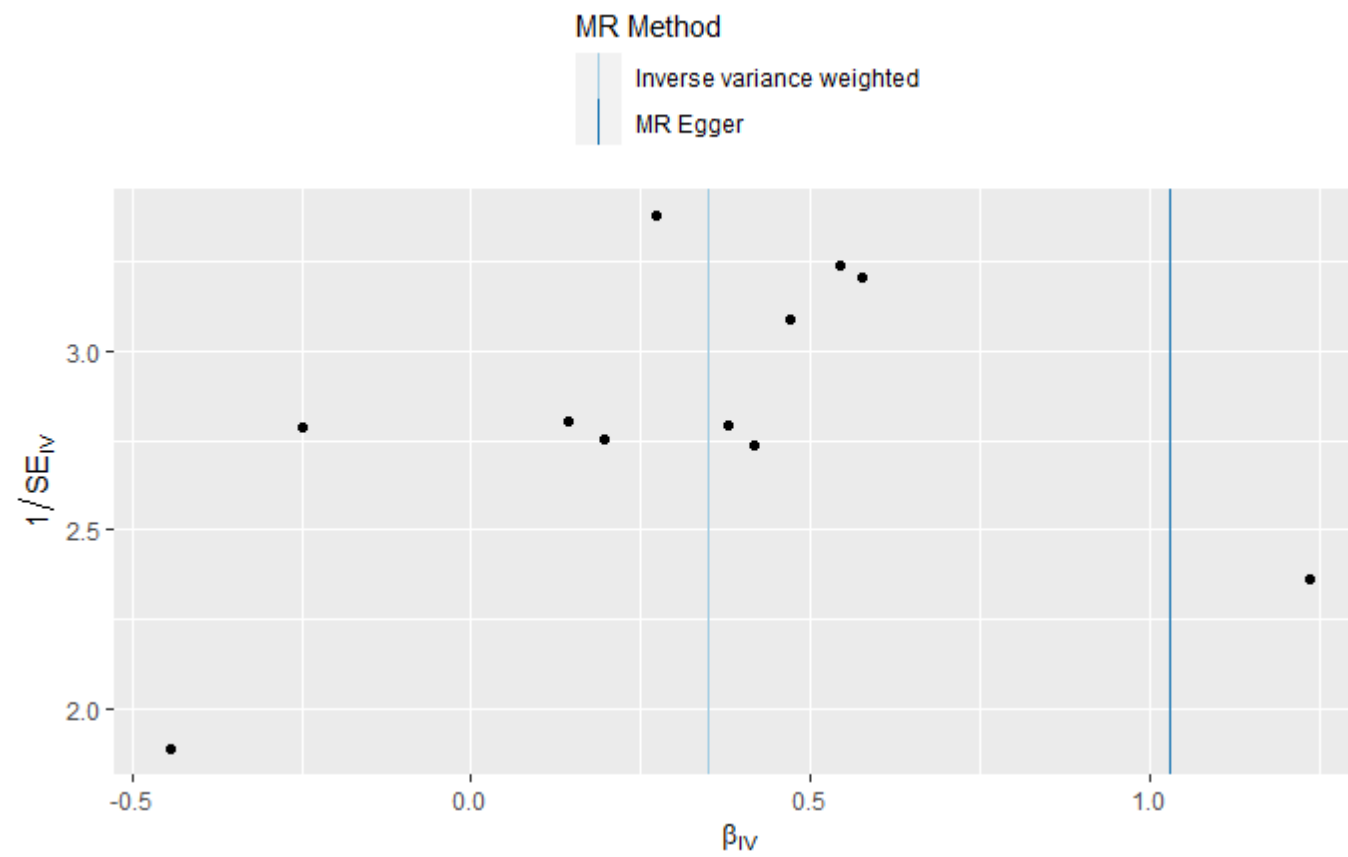

Supplement: Supplementary file 16 [file Eubacteriumnodatum BT funnel.pdf › Supplementary Figure Files 2 scatter plot.zip/Eubacteriumnodatum BT funnel.pdf]

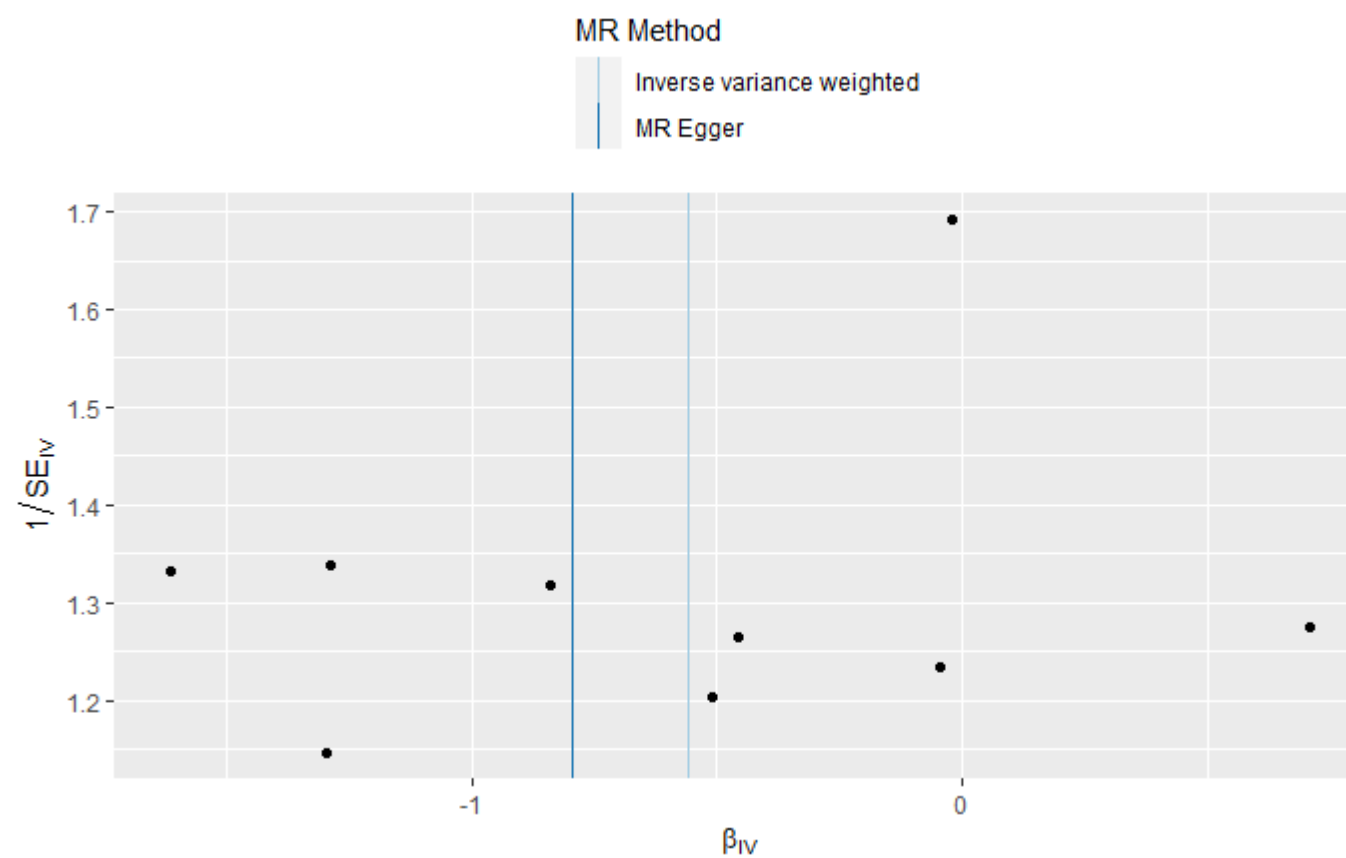

Supplement: Supplementary file 17 [file Eubacteriumrectale BT funnel.pdf › Supplementary Figure Files 2 scatter plot.zip/Eubacteriumrectale BT funnel.pdf]

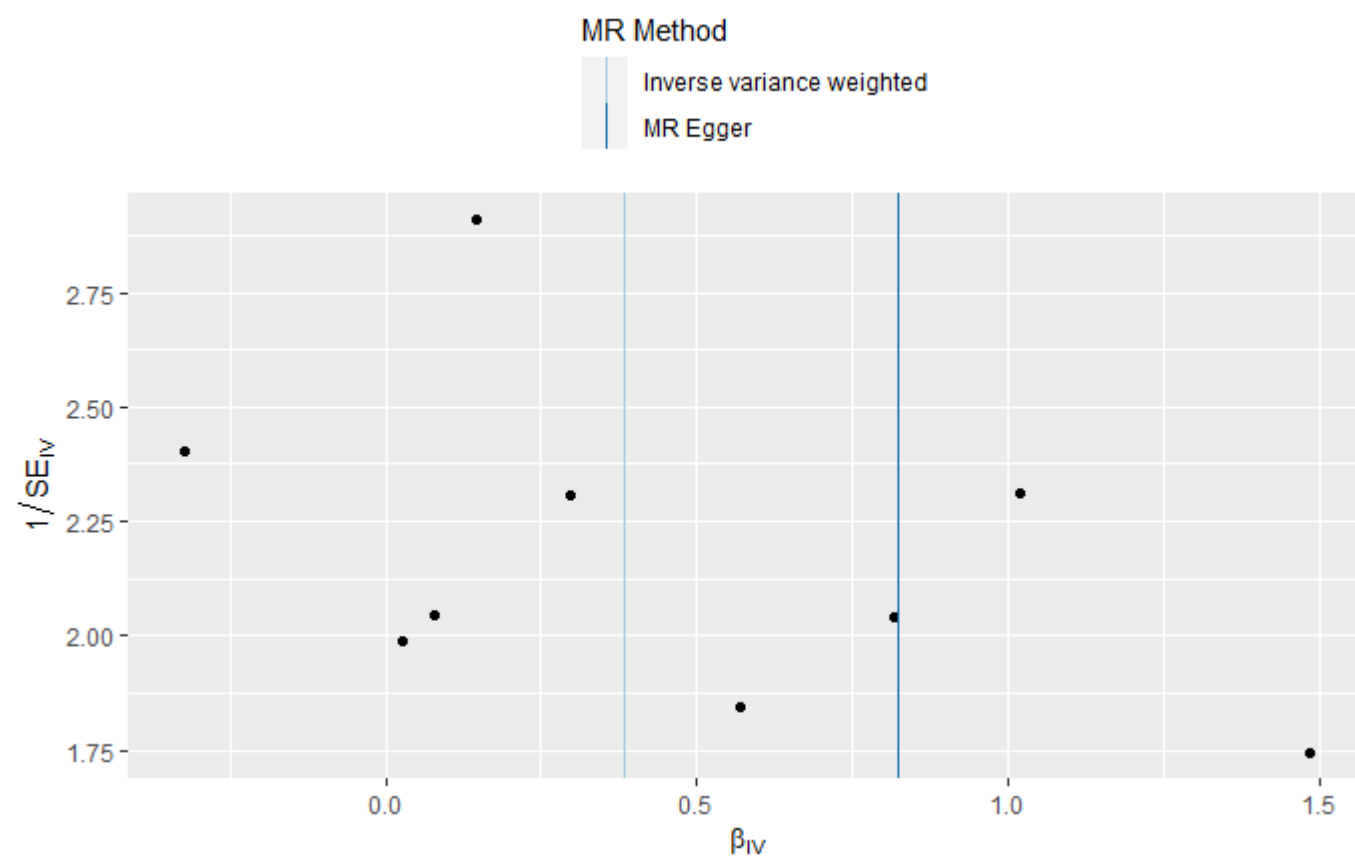

Supplement: Supplementary file 18 [file Gastranaerophilales BT funnel.pdf › Supplementary Figure Files 2 scatter plot.zip/Gastranaerophilales BT funnel.pdf]

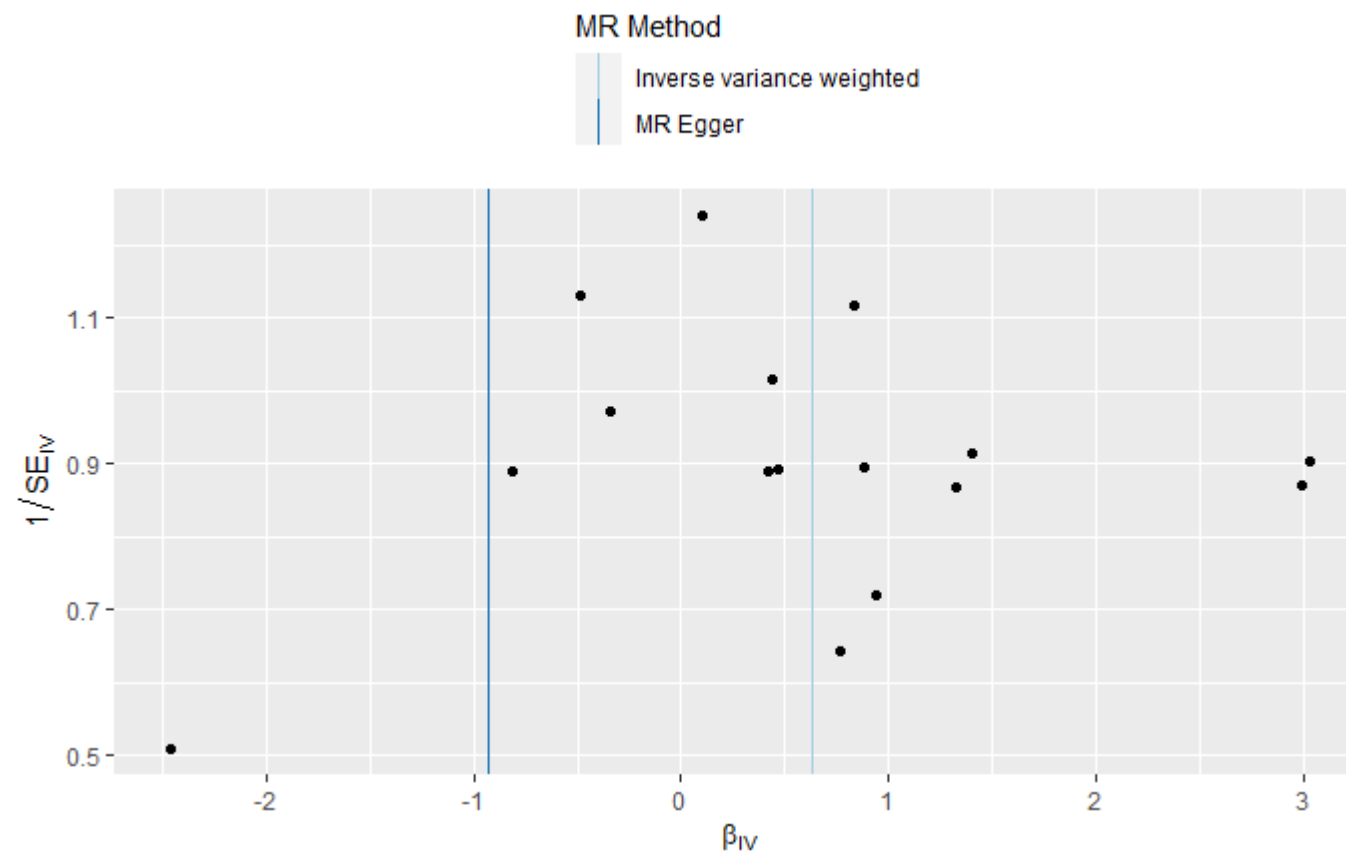

Supplement: Supplementary file 19 [file Intestinimonas PT funnel.pdf › Supplementary Figure Files 2 scatter plot.zip/Intestinimonas PT funnel.pdf]

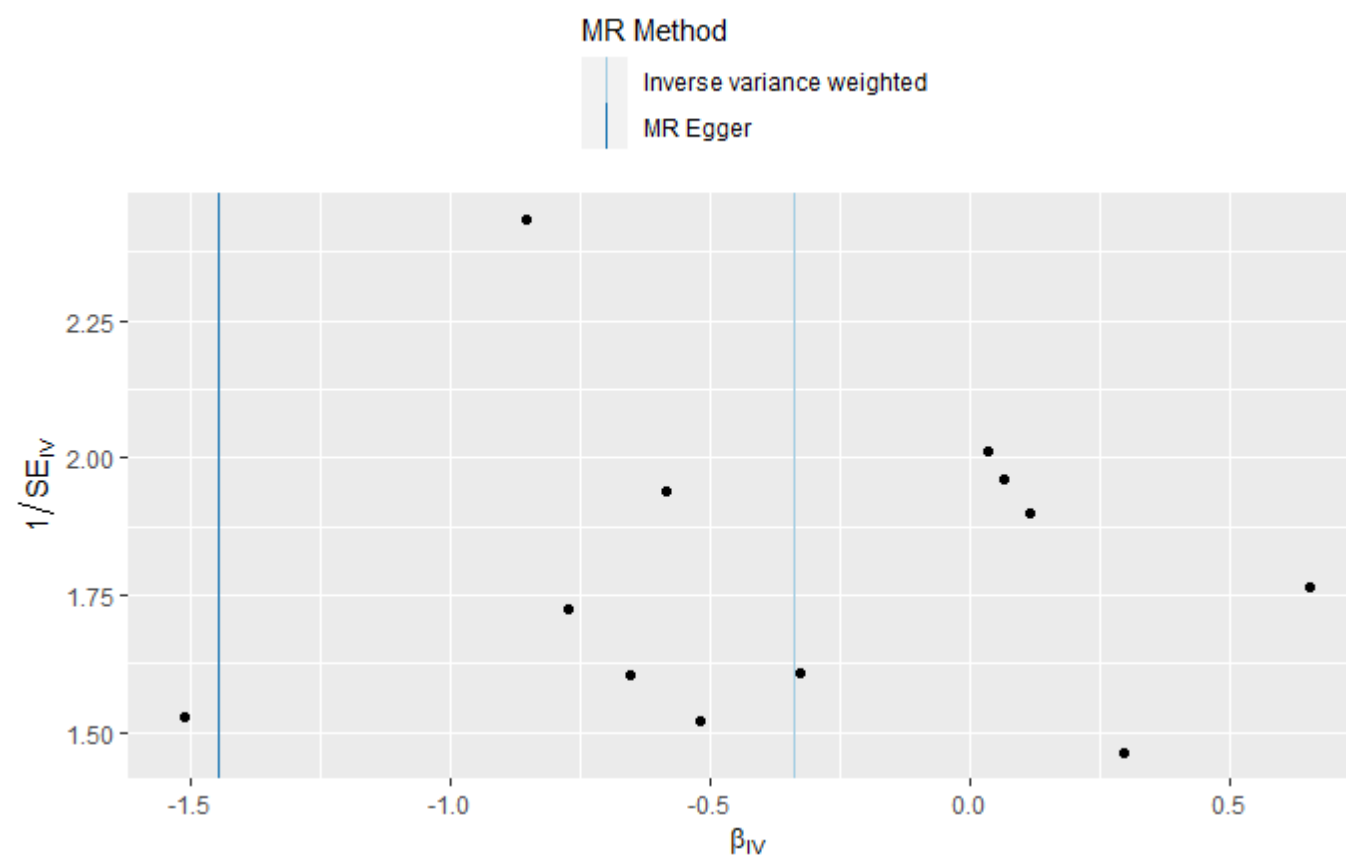

Supplement: Supplementary file 20 [file Mollicute With ST funnel.pdf › Supplementary Figure Files 2 scatter plot.zip/Mollicute With ST funnel.pdf]

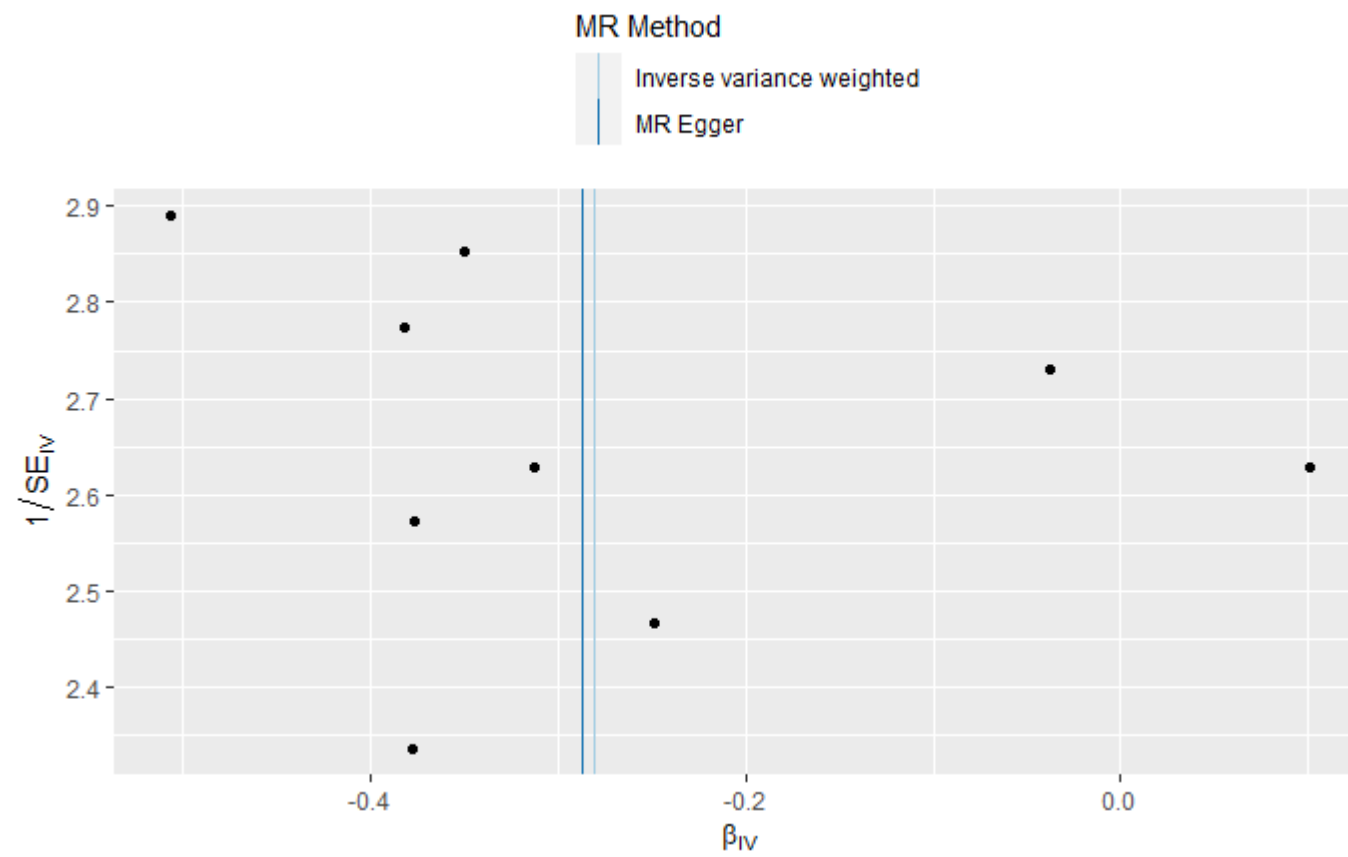

Supplement: Supplementary file 21 [file Oscillospira AT funnel.pdf › Supplementary Figure Files 2 scatter plot.zip/Oscillospira AT funnel.pdf]

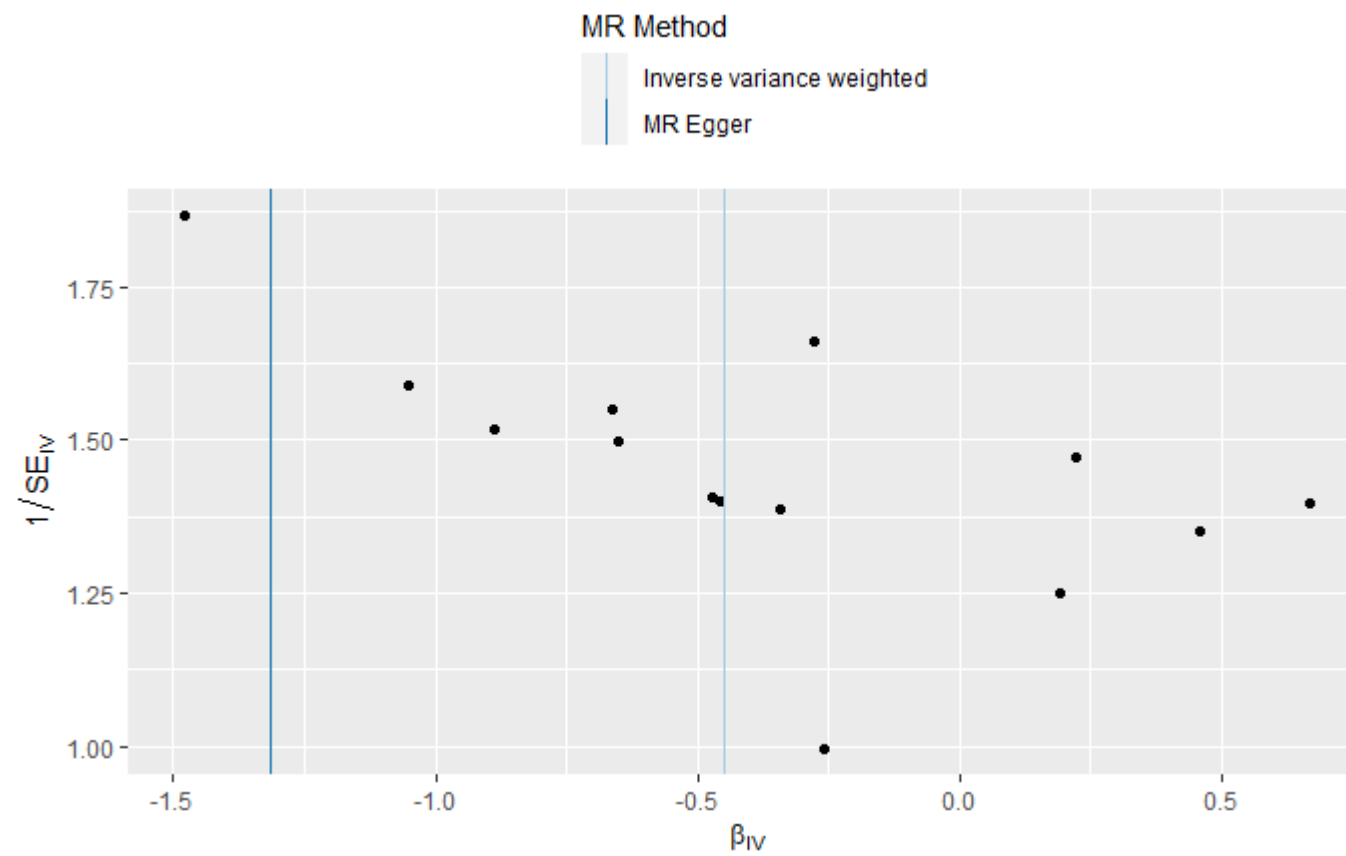

Supplement: Supplementary file 22 [file Romboutsia BT funnel.pdf › Supplementary Figure Files 2 scatter plot.zip/Romboutsia BT funnel.pdf]

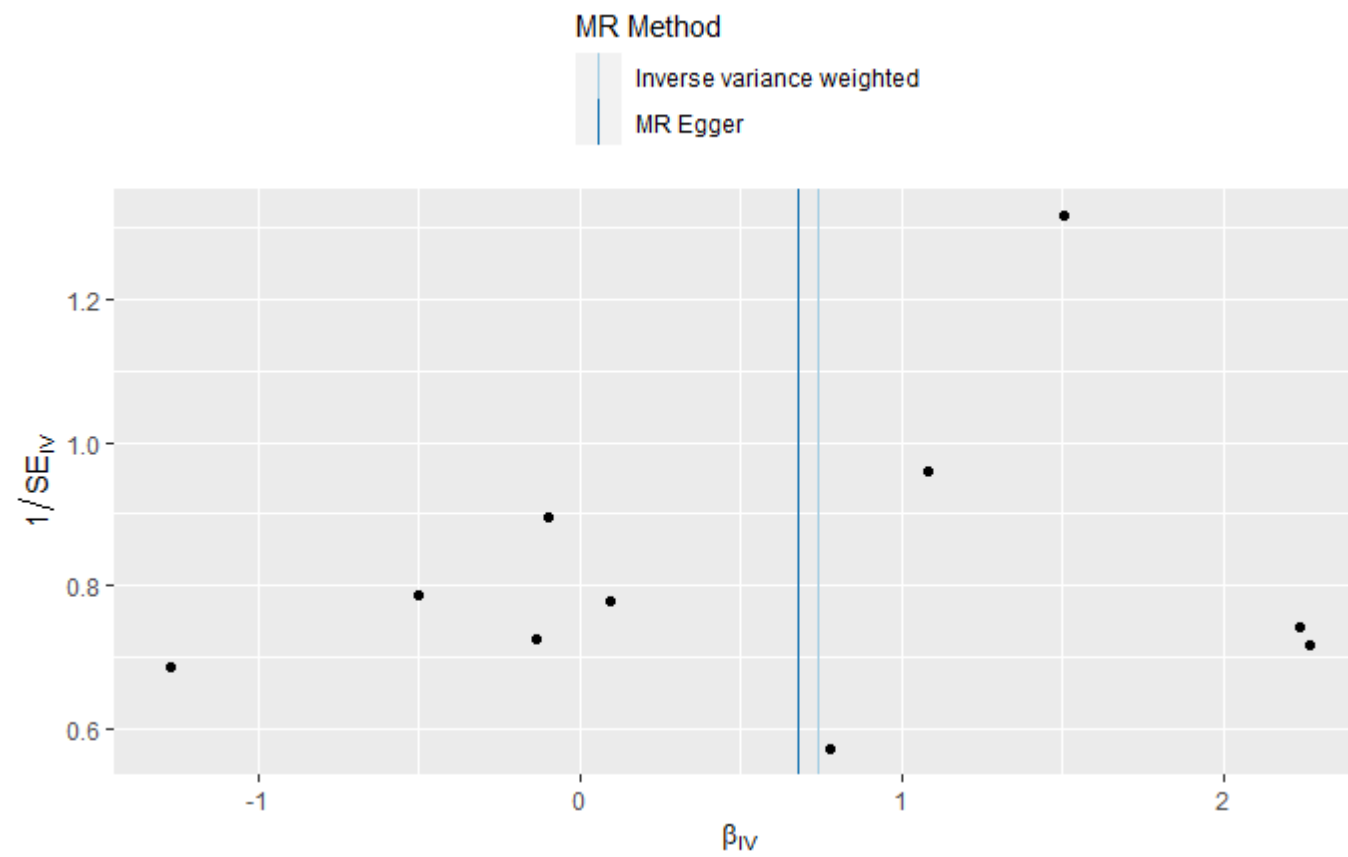

Supplement: Supplementary file 23 [file Ruminococcaceae PT funnel.pdf › Supplementary Figure Files 2 scatter plot.zip/Ruminococcaceae PT funnel.pdf]

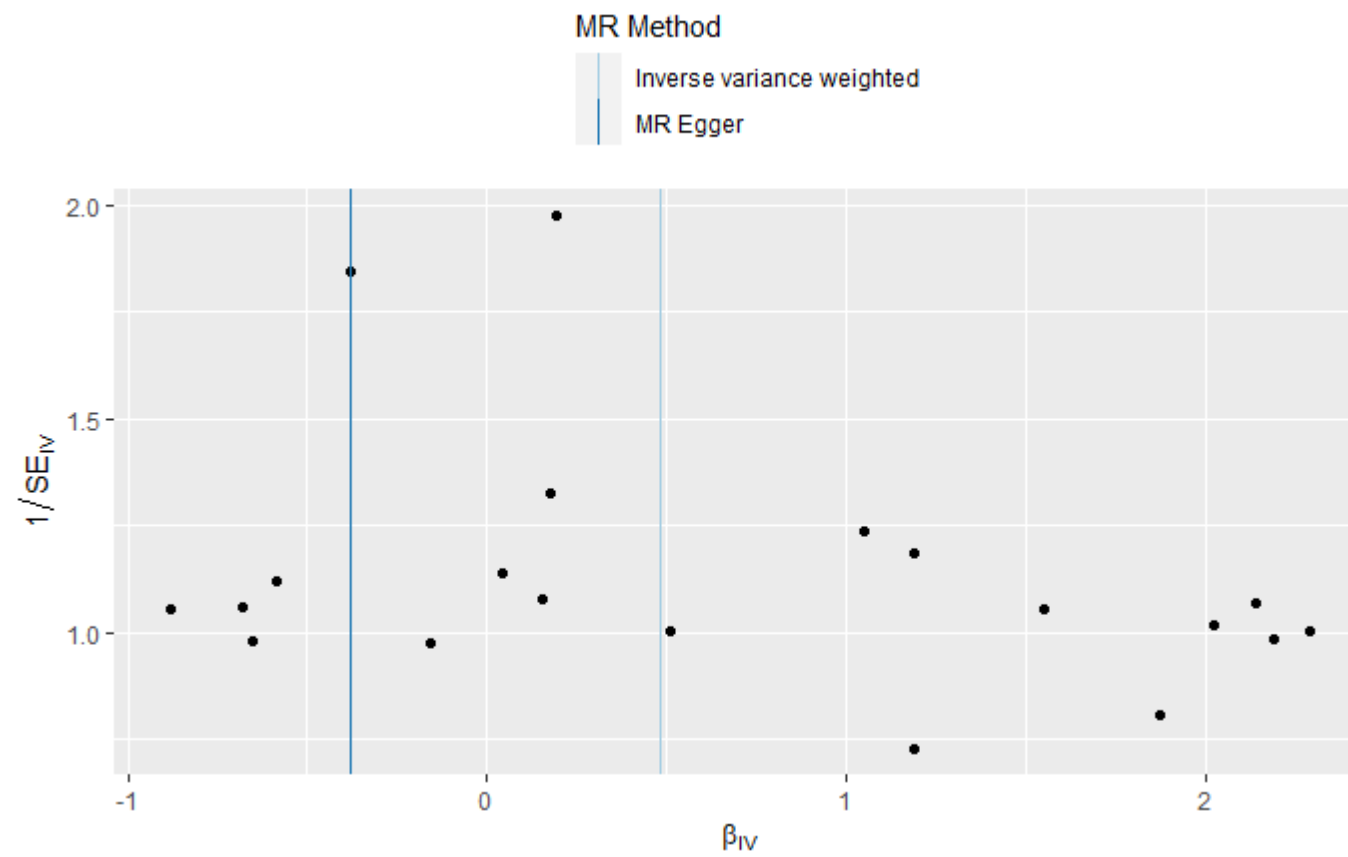

Supplement: Supplementary file 24 [file RuminococcaceaeUCG GT funnel.pdf › Supplementary Figure Files 2 scatter plot.zip/RuminococcaceaeUCG GT funnel.pdf]

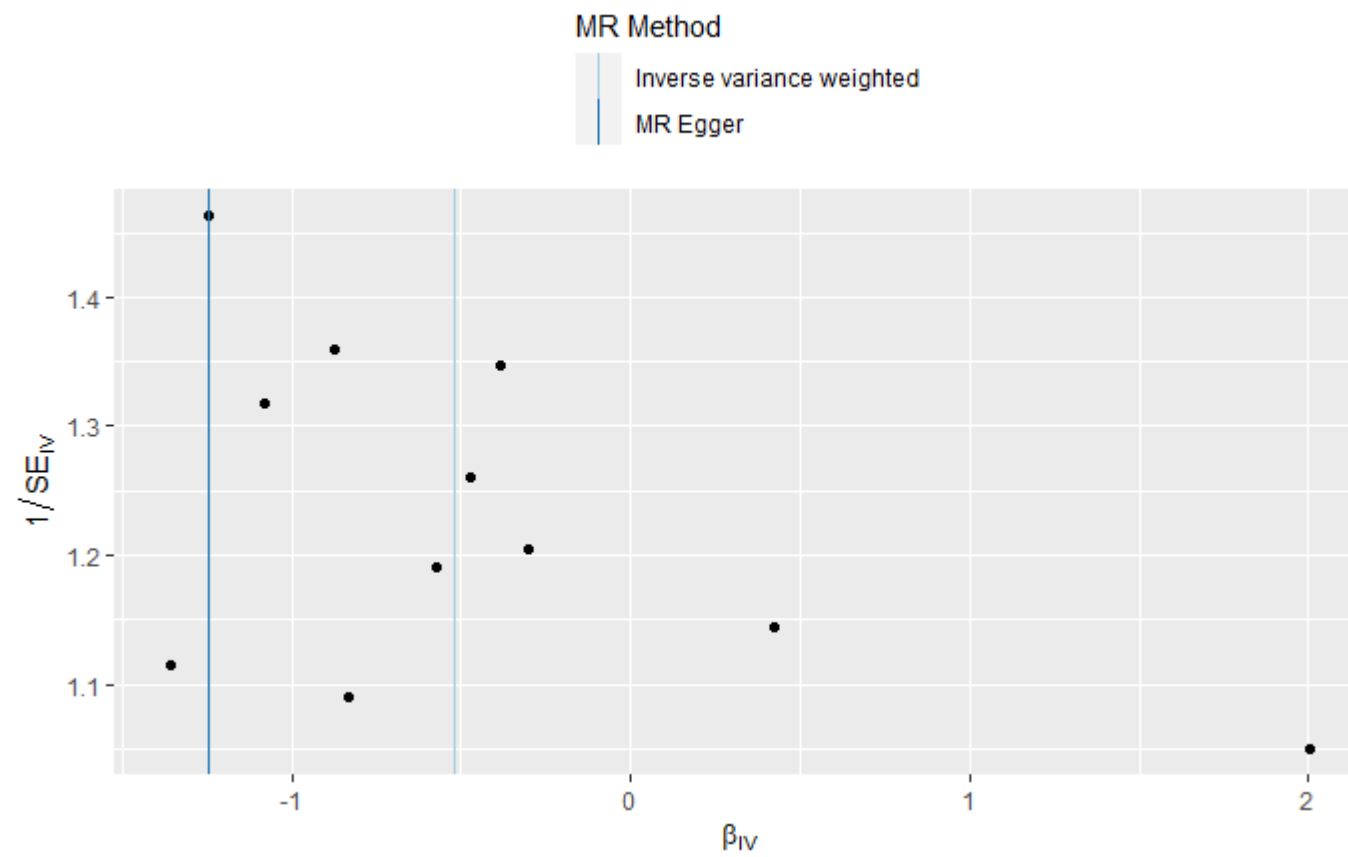

Supplement: Supplementary file 25 [file Ruminococcusgnavus PT funnel.pdf › Supplementary Figure Files 2 scatter plot.zip/Ruminococcusgnavus PT funnel.pdf]

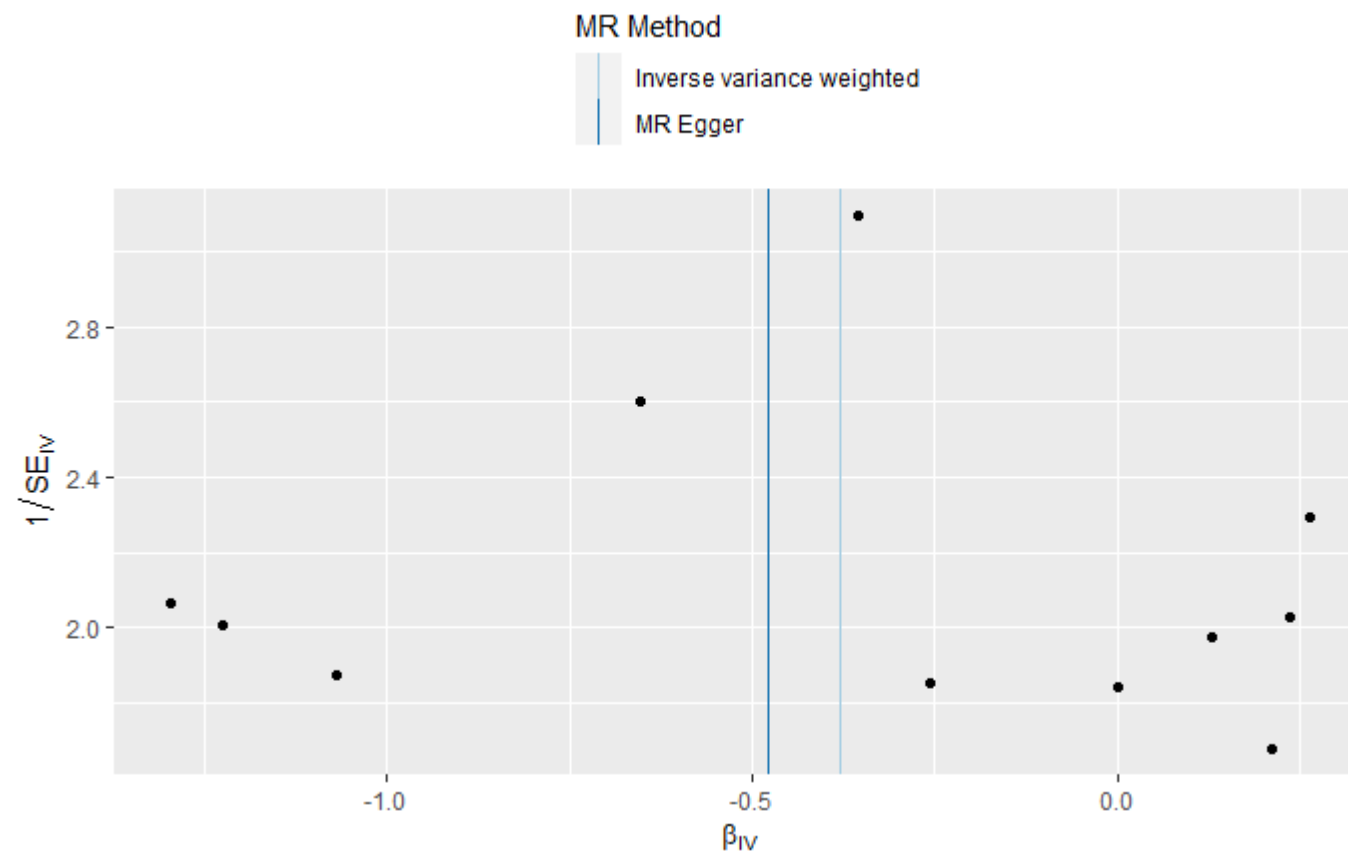

Supplement: Supplementary file 26 [file Subdoligranulum AT funnel.pdf › Supplementary Figure Files 2 scatter plot.zip/Subdoligranulum AT funnel.pdf]

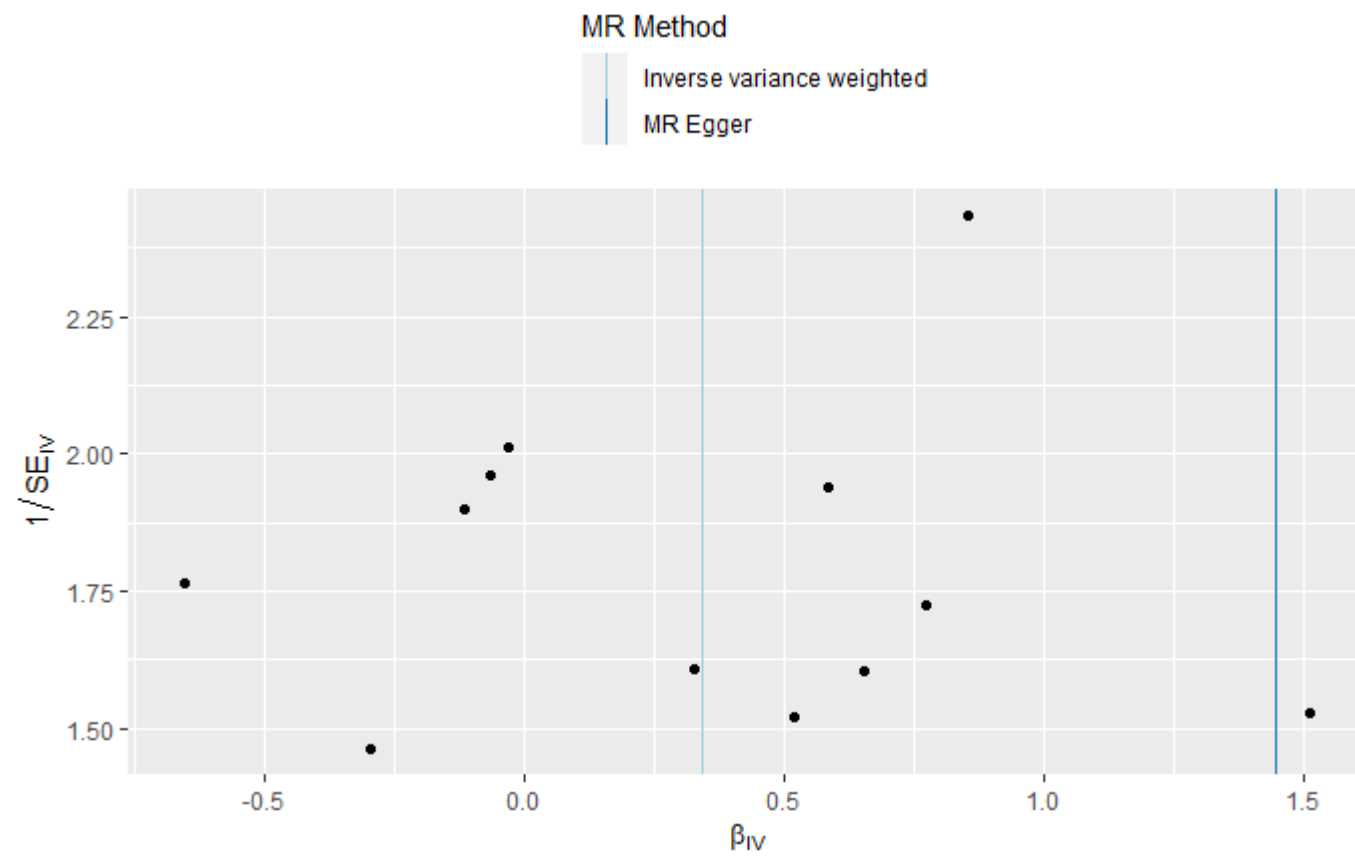

Supplement: Supplementary file 27 [file Tenericutes ST funnel.pdf › Supplementary Figure Files 2 scatter plot.zip/Tenericutes ST funnel.pdf]

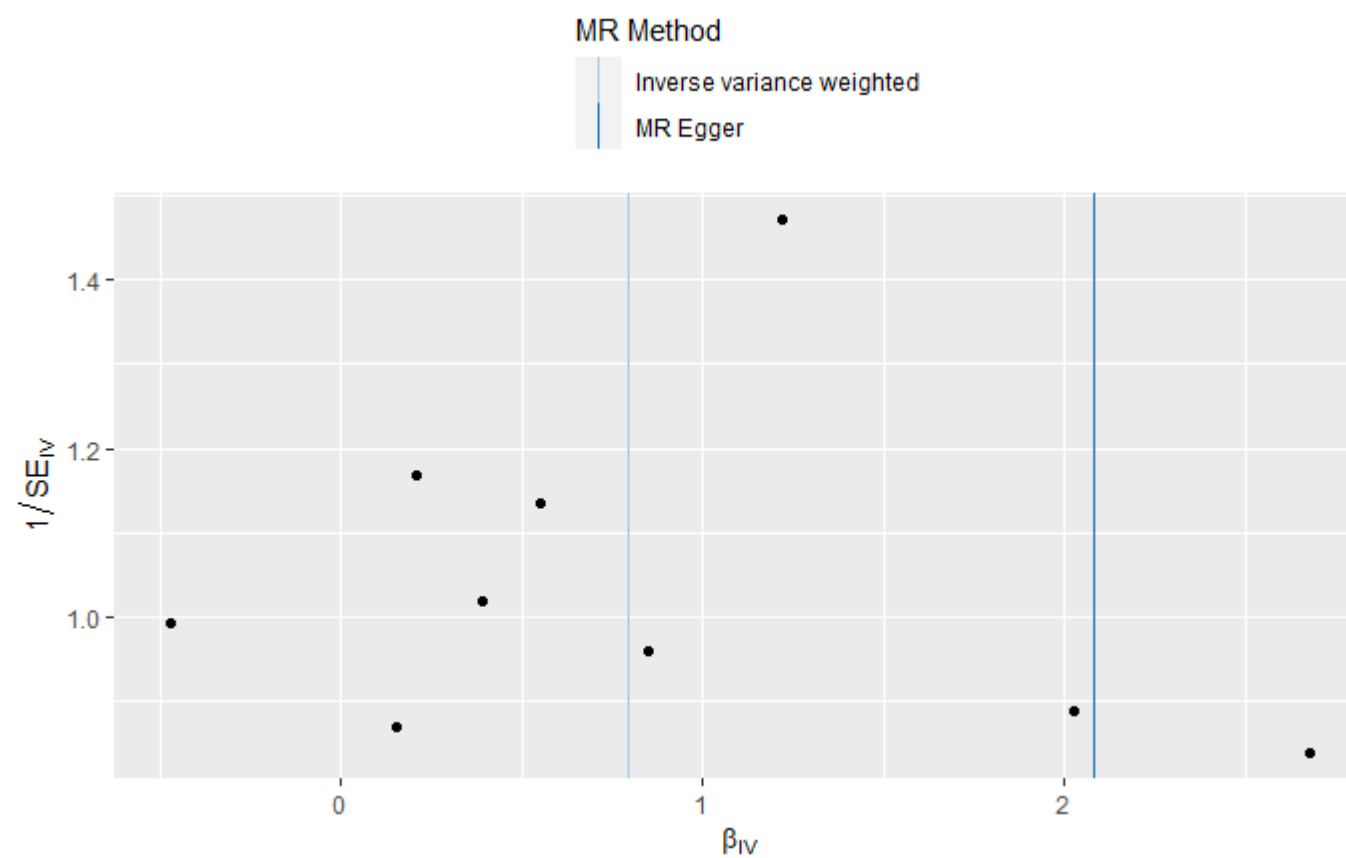

Supplement: Supplementary file 28 [file Turicibacter PT funnel.pdf › Supplementary Figure Files 2 scatter plot.zip/Turicibacter PT funnel.pdf]

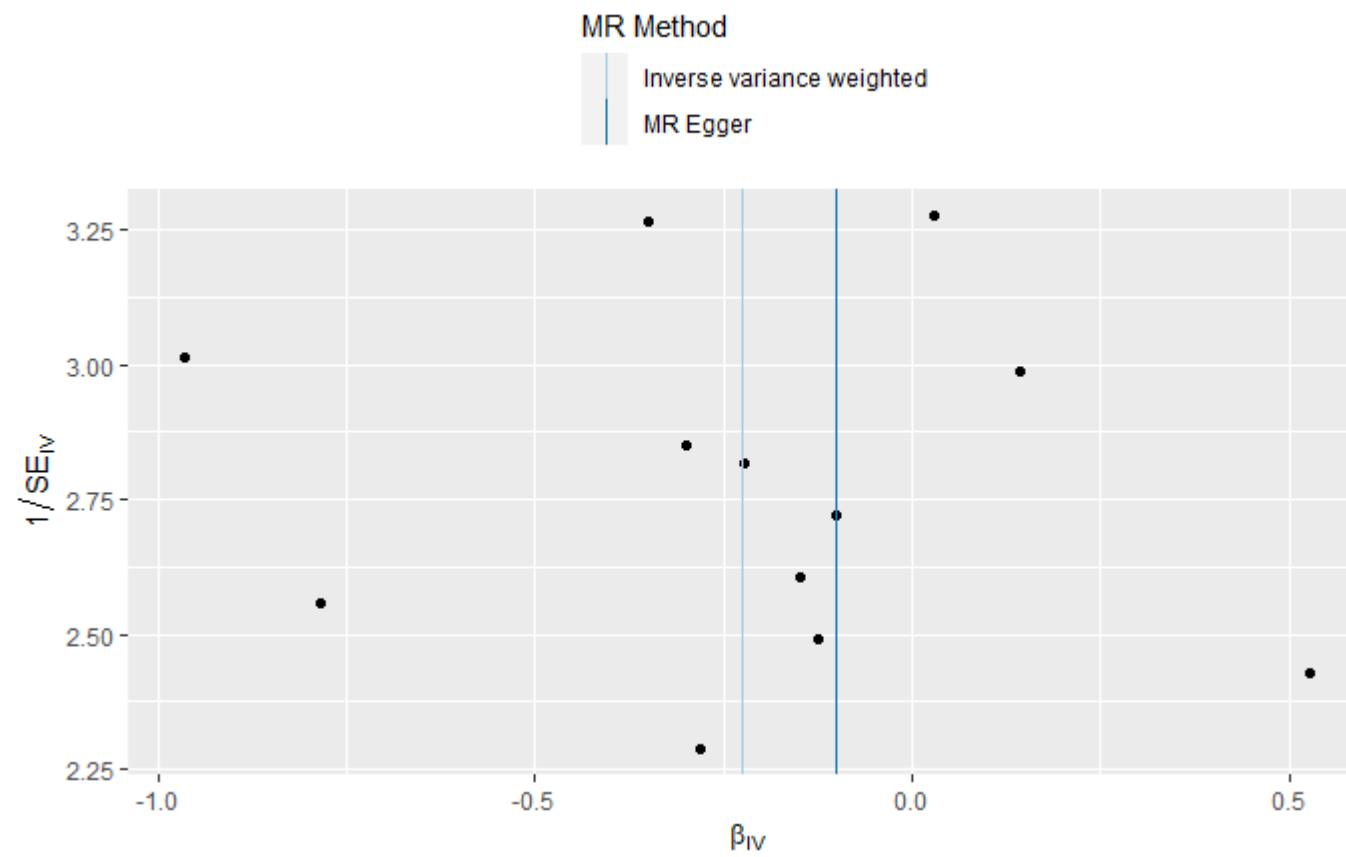

Supplement: Supplementary file 29 [file Victivallaceae BT funnel.pdf › Supplementary Figure Files 2 scatter plot.zip/Victivallaceae BT funnel.pdf]

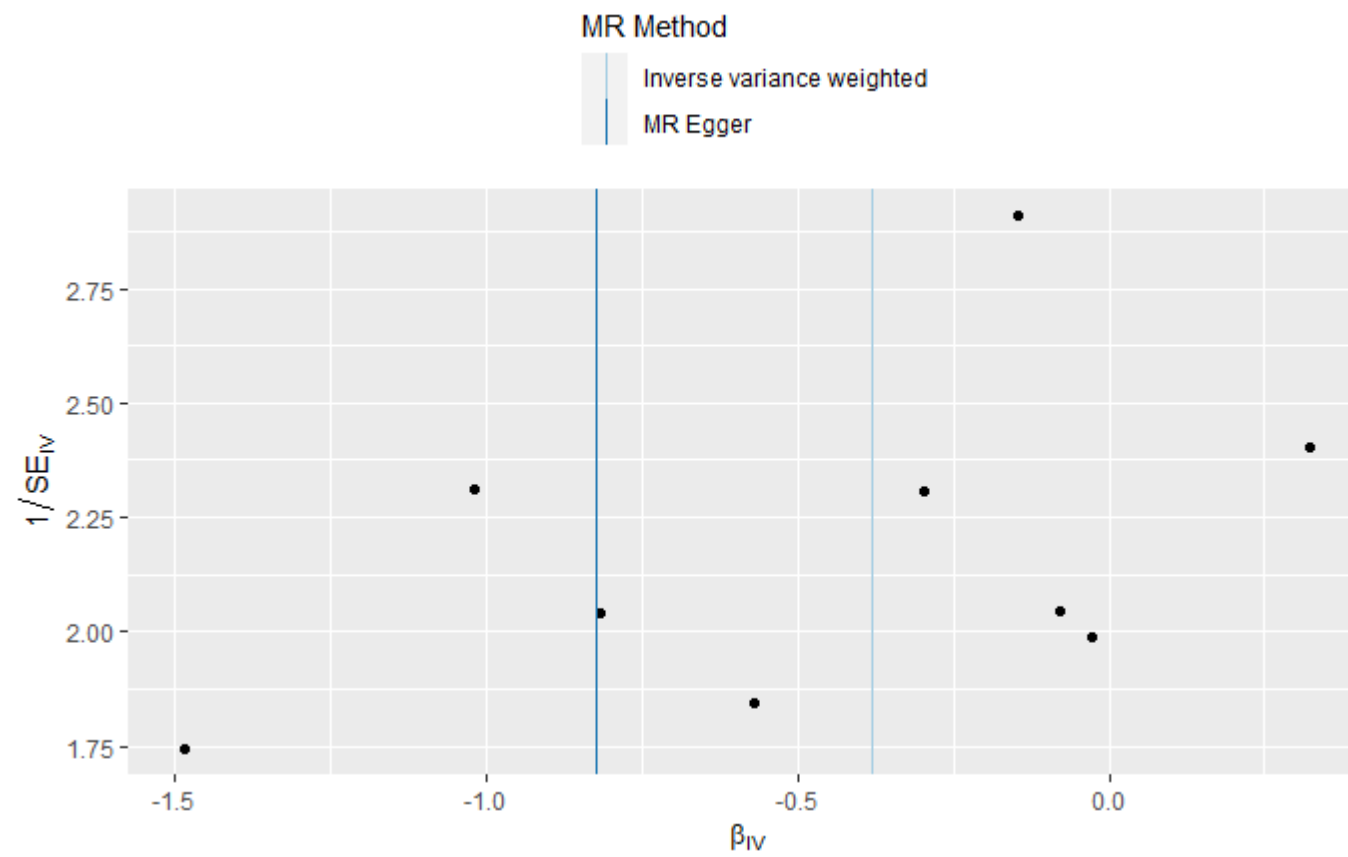

Supplement: Supplementary file 30 [file unknowngenus BT funnel.pdf › Supplementary Figure Files 2 scatter plot.zip/unknowngenus BT funnel.pdf]

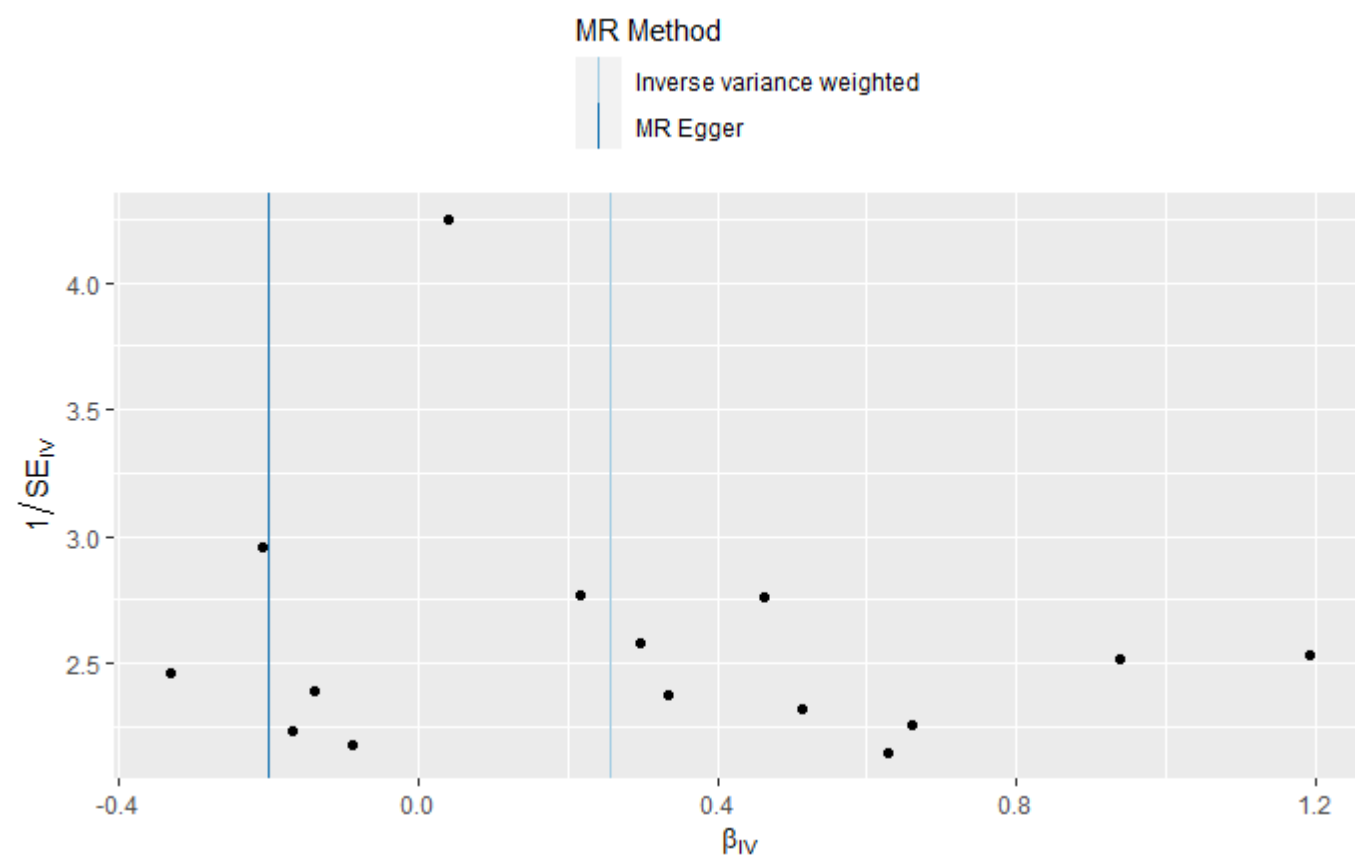

Supplement: Supplementary file 31 [file unknowngenus073 AT funnel.pdf › Supplementary Figure Files 2 scatter plot.zip/unknowngenus073 AT funnel.pdf]

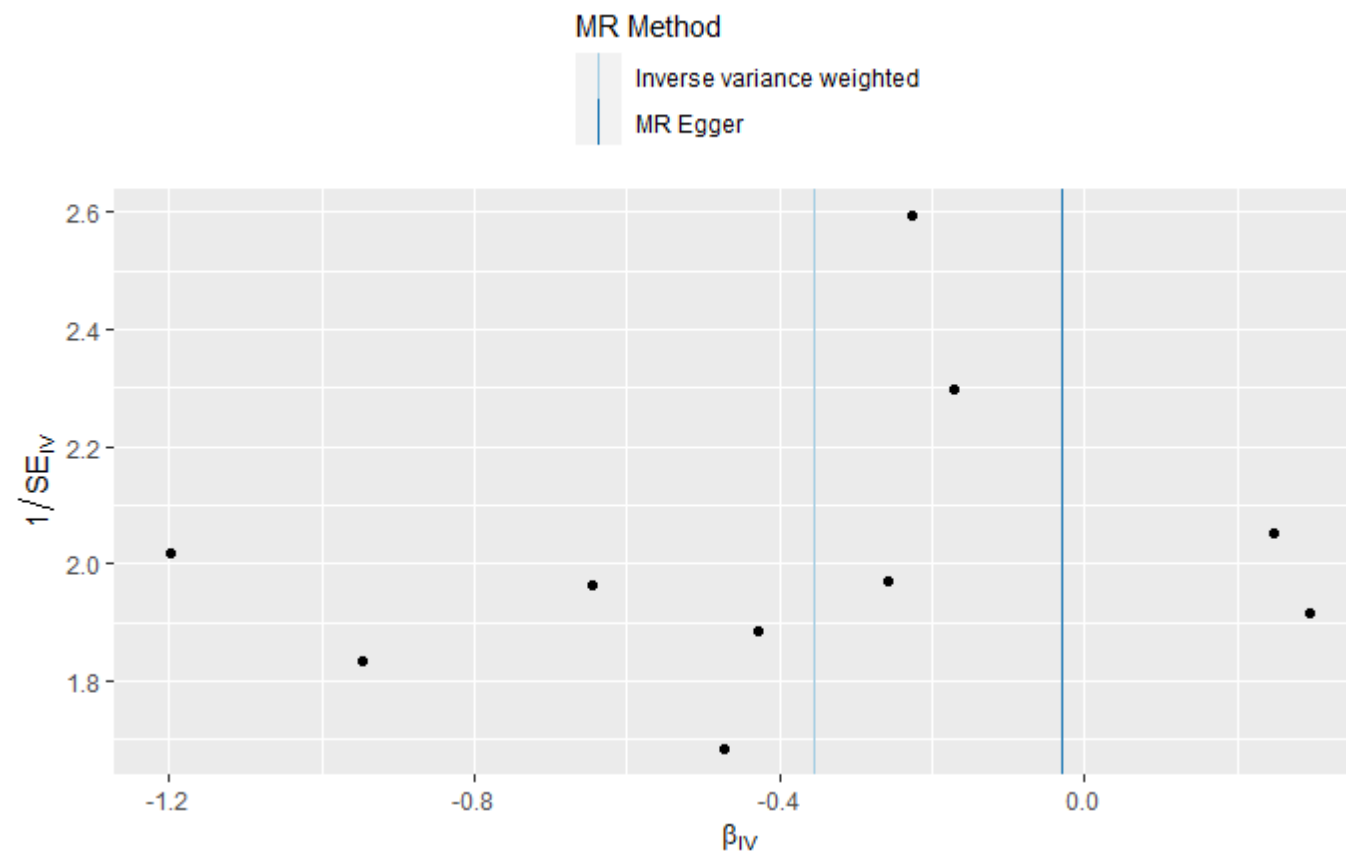

Supplement: Supplementary file 32 [file Betaproteobacteria with AT funnel Rplot.pdf › Supplementary Figure Files 1 funnel plot/Betaproteobacteria with AT funnel Rplot.pdf]



Supplement: Supplementary file 33 [file Bifidobacterium ST funnel.pdf › Supplementary Figure Files 1 funnel plot/Bifidobacterium ST funnel.pdf]



Supplement: Supplementary file 34 [file Bilophila PT funnel.pdf › Supplementary Figure Files 1 funnel plot/Bilophila PT funnel.pdf]



Supplement: Supplementary file 35 [file Butyricimonas PT funnel.pdf › Supplementary Figure Files 1 funnel plot/Butyricimonas PT funnel.pdf]



Supplement: Supplementary file 36 [file Clostridia GT funnel.pdf › Supplementary Figure Files 1 funnel plot/Clostridia GT funnel.pdf]

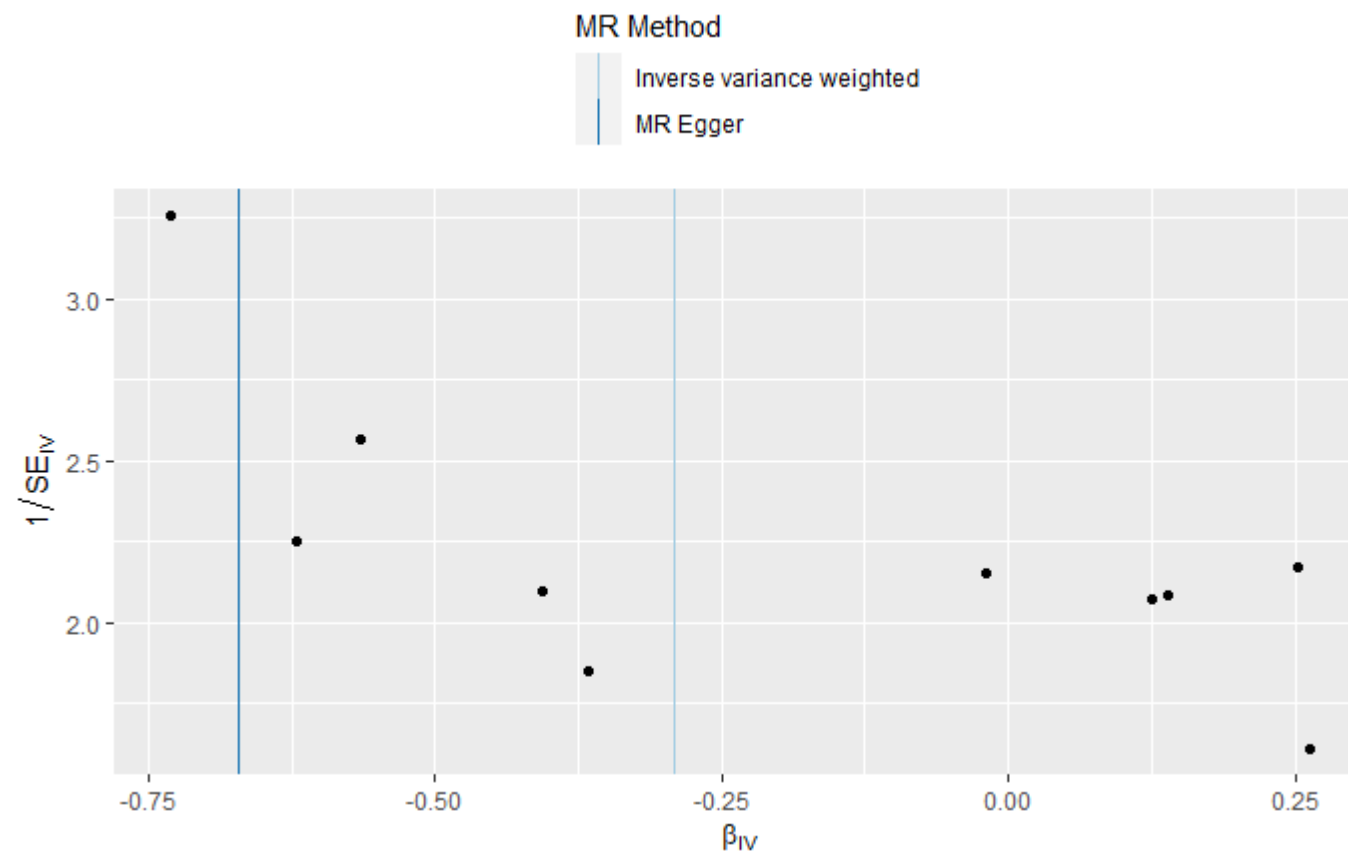

Supplement: Supplementary file 37 [file Clostridiaceae AT funnel.pdf › Supplementary Figure Files 1 funnel plot/Clostridiaceae AT funnel.pdf]



Supplement: Supplementary file 38 [file Clostridiales PT funnel.pdf › Supplementary Figure Files 1 funnel plot/Clostridiales PT funnel.pdf]

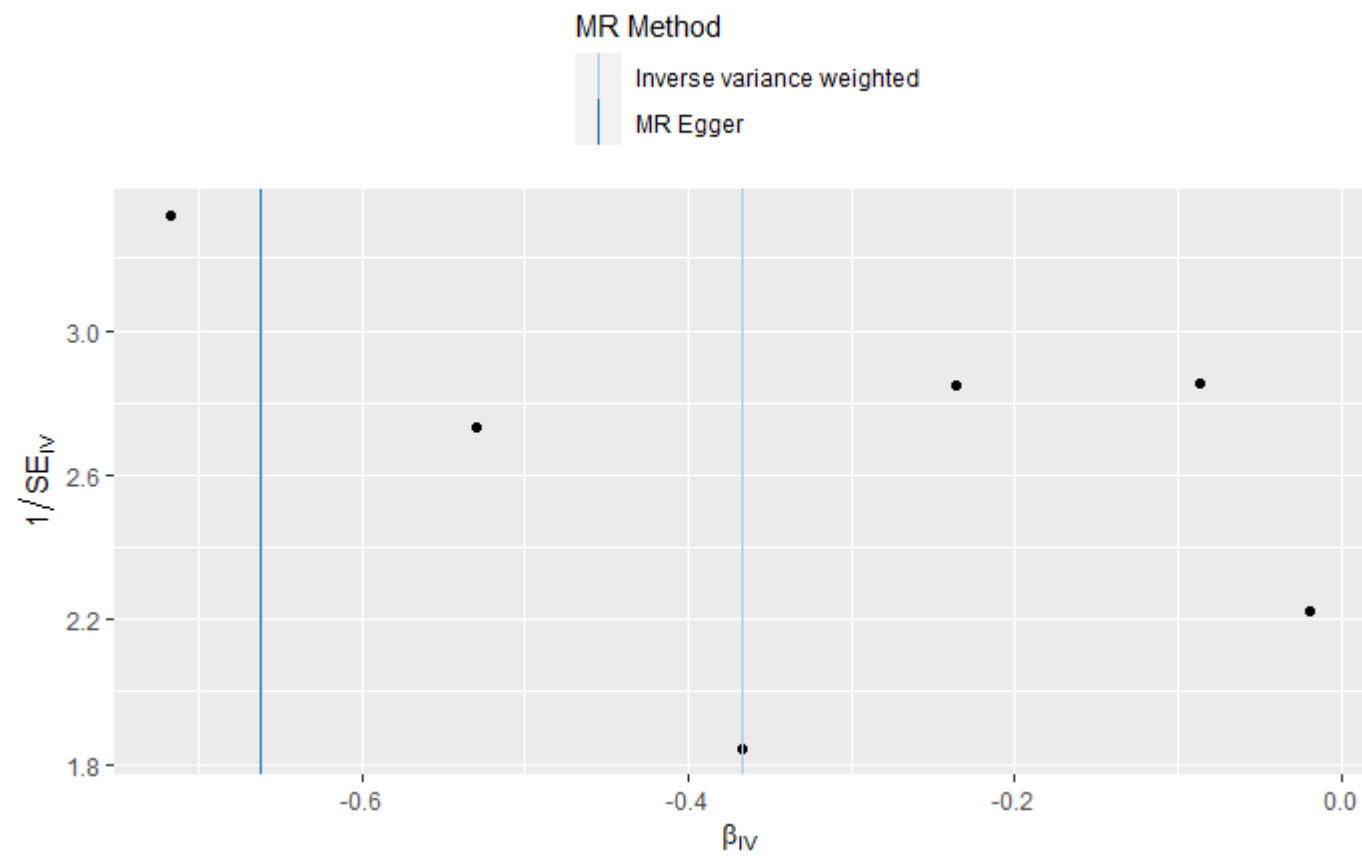

Supplement: Supplementary file 39 [file Clostridiumsensustricto AT funnel.pdf › Supplementary Figure Files 1 funnel plot/Clostridiumsensustricto AT funnel.pdf]

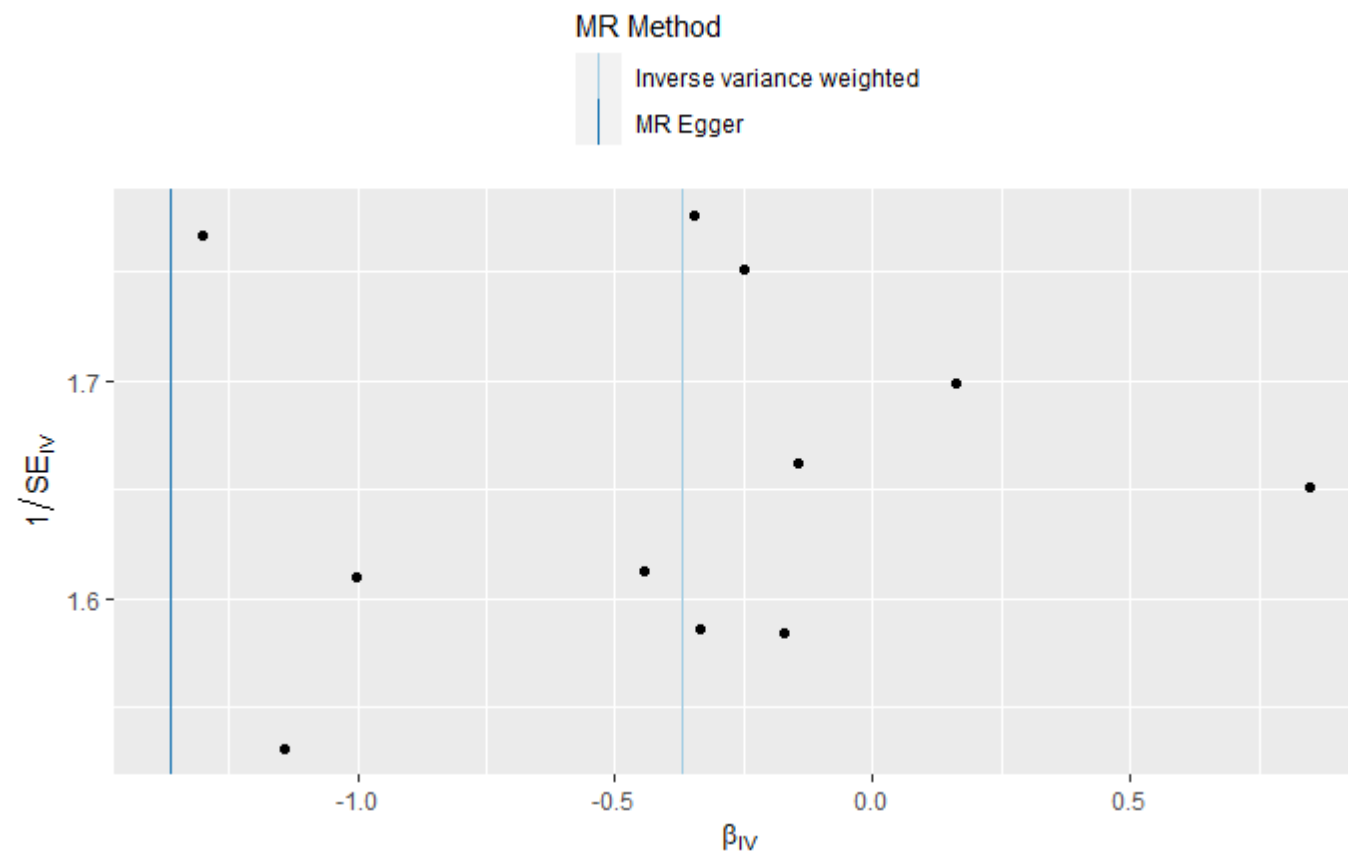

Supplement: Supplementary file 40 [file Coprobacter GT funnel.pdf › Supplementary Figure Files 1 funnel plot/Coprobacter GT funnel.pdf]

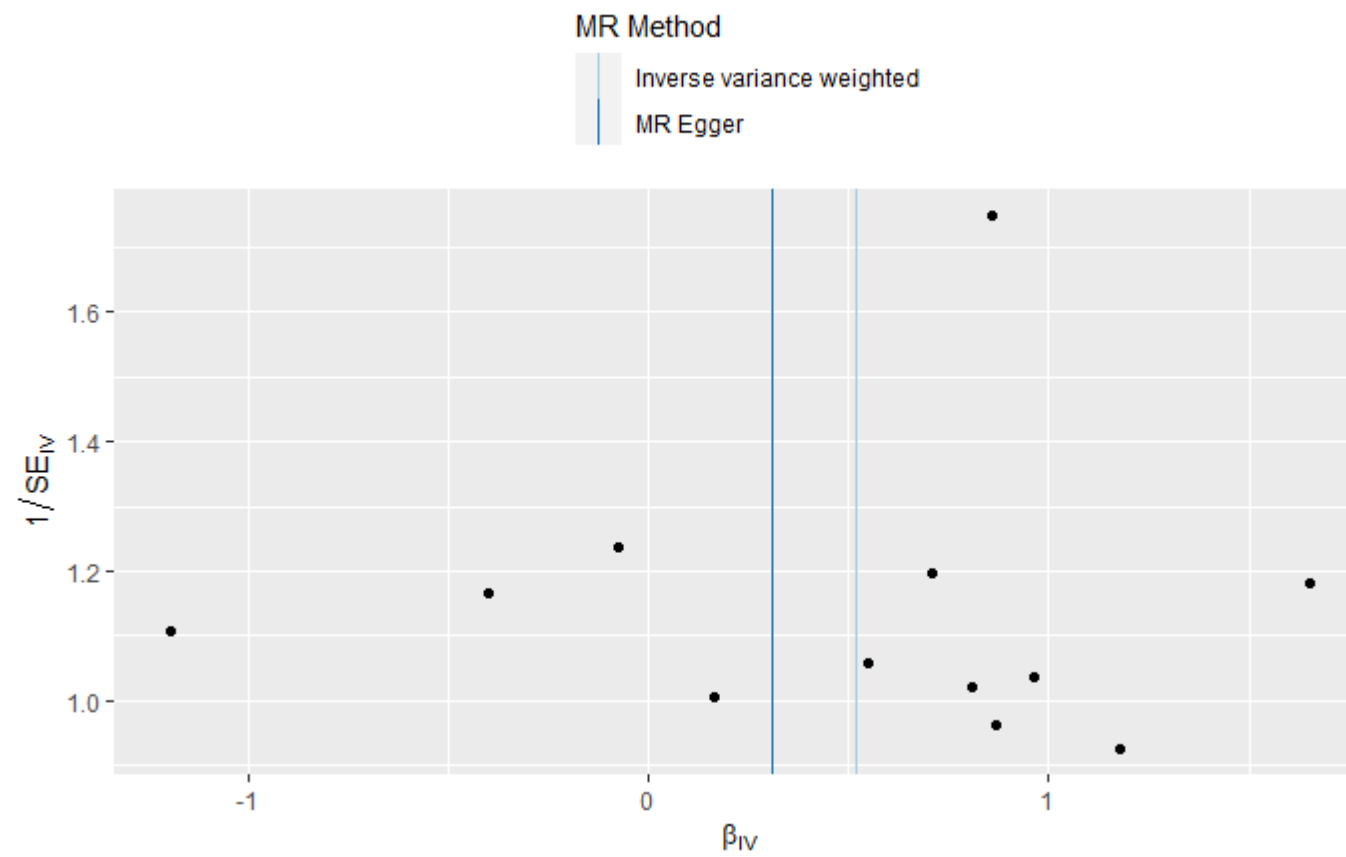

Supplement: Supplementary file 41 [file Coprococcus GT funnel.pdf › Supplementary Figure Files 1 funnel plot/Coprococcus GT funnel.pdf]

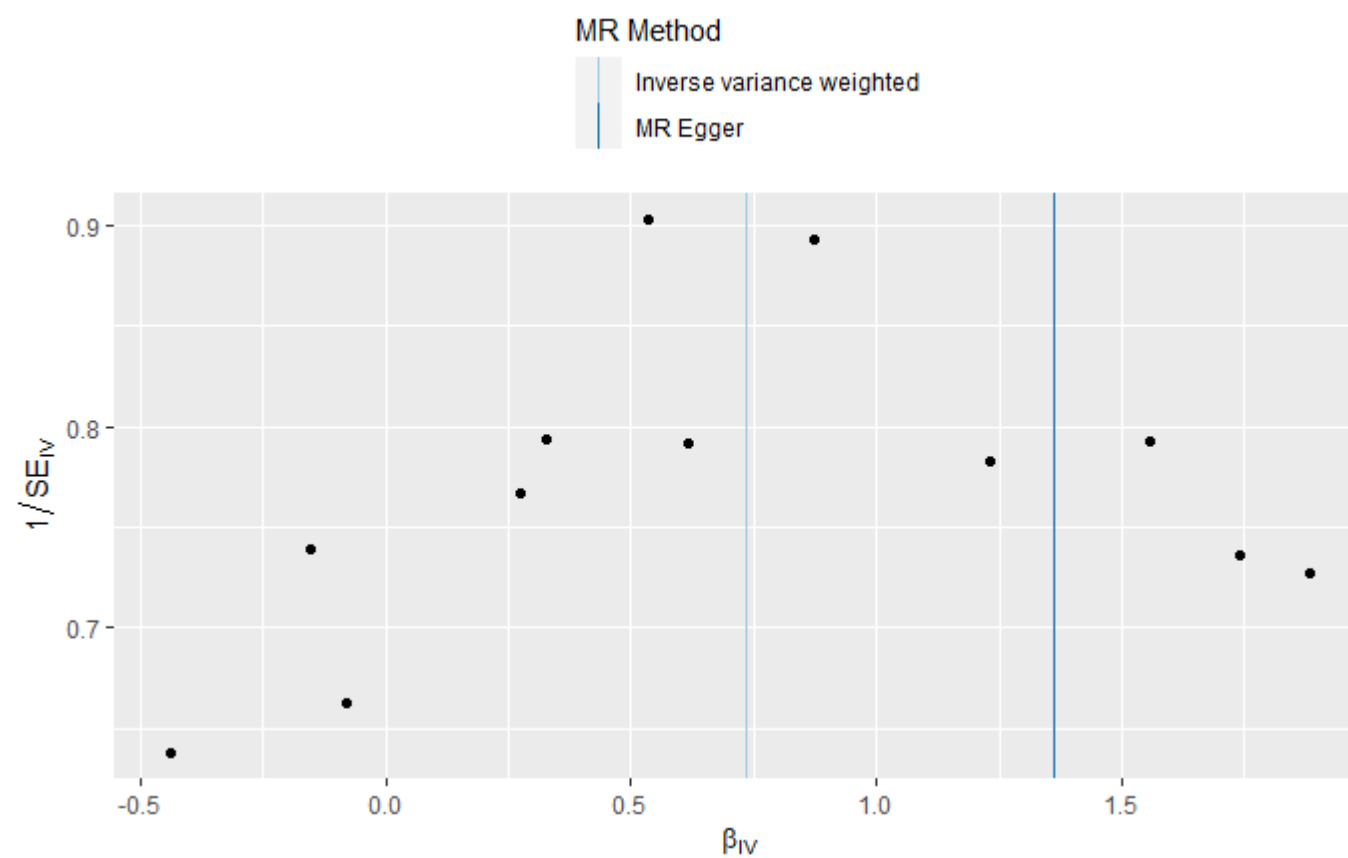

Supplement: Supplementary file 42 [file Deltaproteobacteria GT funnel.pdf › Supplementary Figure Files 1 funnel plot/Deltaproteobacteria GT funnel.pdf]



Supplement: Supplementary file 43 [file Desulfovibrionaceae PT funnel.pdf › Supplementary Figure Files 1 funnel plot/Desulfovibrionaceae PT funnel.pdf]



Supplement: Supplementary file 44 [file Desulfovibrionales PT funnel.pdf › Supplementary Figure Files 1 funnel plot/Desulfovibrionales PT funnel.pdf]



Supplement: Supplementary file 45 [file Eisenbergiella AT funnel.pdf › Supplementary Figure Files 1 funnel plot/Eisenbergiella AT funnel.pdf]



Supplement: Supplementary file 46 [file Erysipelatoclostridium BT funnel.pdf › Supplementary Figure Files 1 funnel plot/Erysipelatoclostridium BT funnel.pdf]



Supplement: Supplementary file 47 [file Eubacteriumnodatum BT funnel.pdf › Supplementary Figure Files 1 funnel plot/Eubacteriumnodatum BT funnel.pdf]

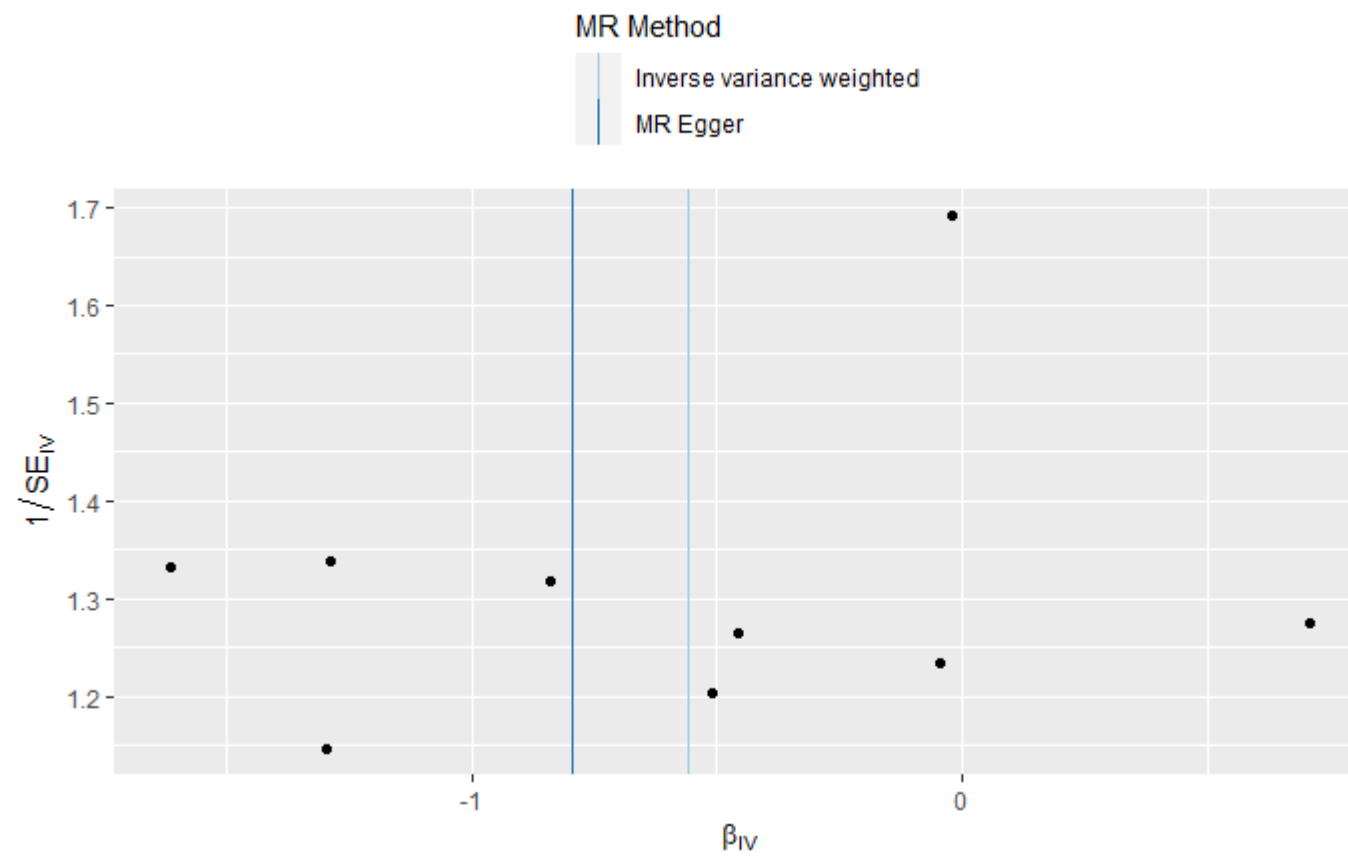

Supplement: Supplementary file 48 [file Eubacteriumrectale BT funnel.pdf › Supplementary Figure Files 1 funnel plot/Eubacteriumrectale BT funnel.pdf]



Supplement: Supplementary file 49 [file Gastranaerophilales BT funnel.pdf › Supplementary Figure Files 1 funnel plot/Gastranaerophilales BT funnel.pdf]

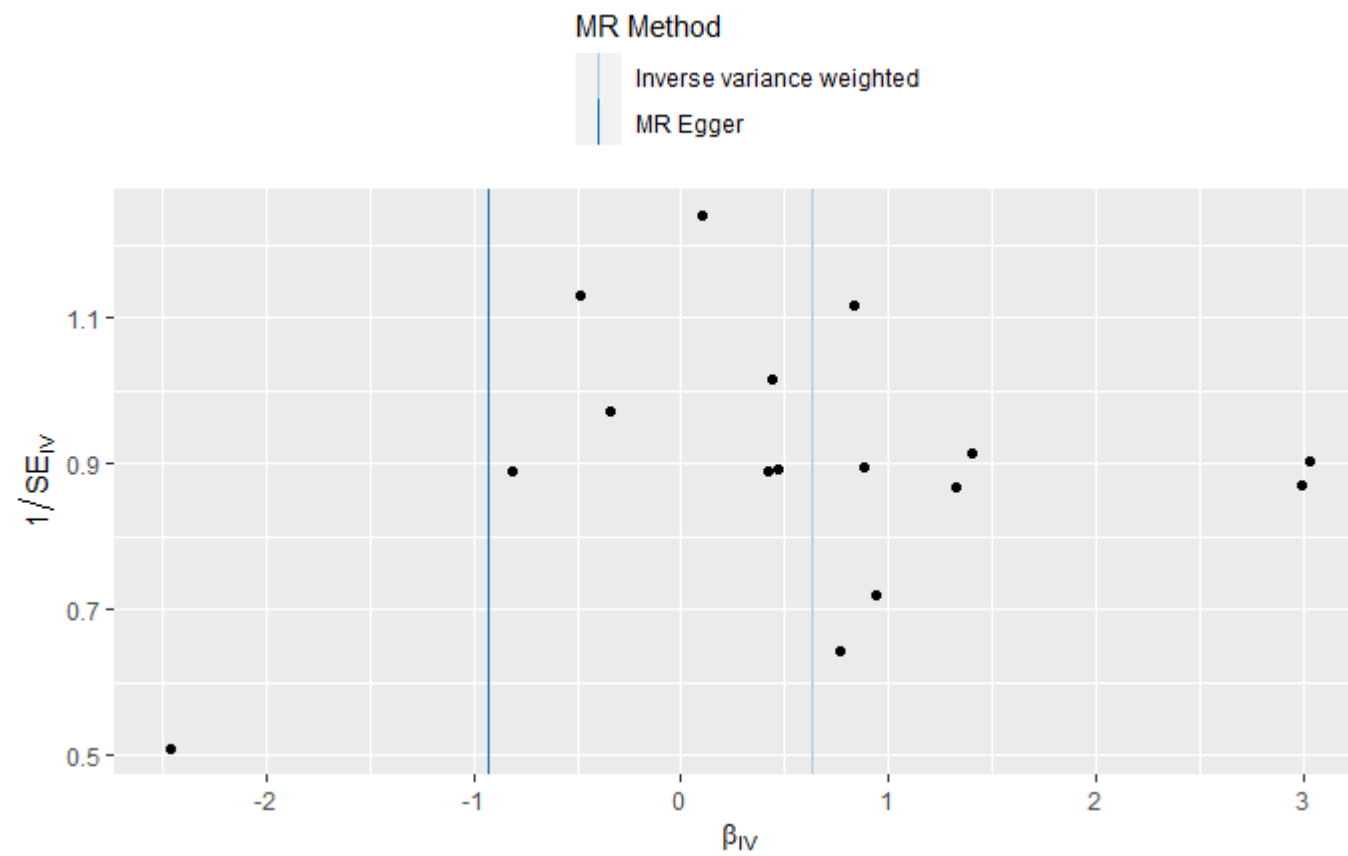

Supplement: Supplementary file 50 [file Intestinimonas PT funnel.pdf › Supplementary Figure Files 1 funnel plot/Intestinimonas PT funnel.pdf]

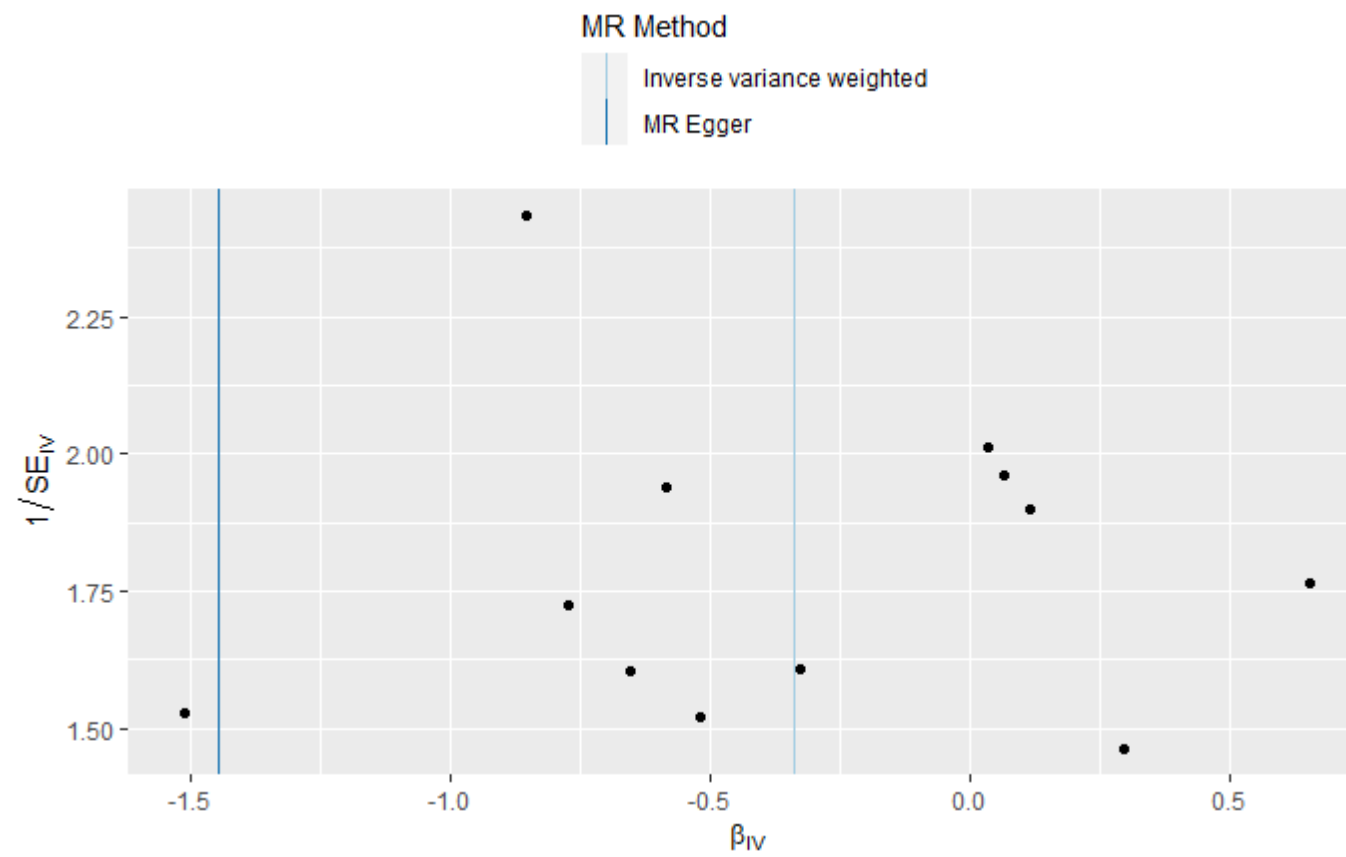

Supplement: Supplementary file 51 [file Mollicute With ST funnel.pdf › Supplementary Figure Files 1 funnel plot/Mollicute With ST funnel.pdf]

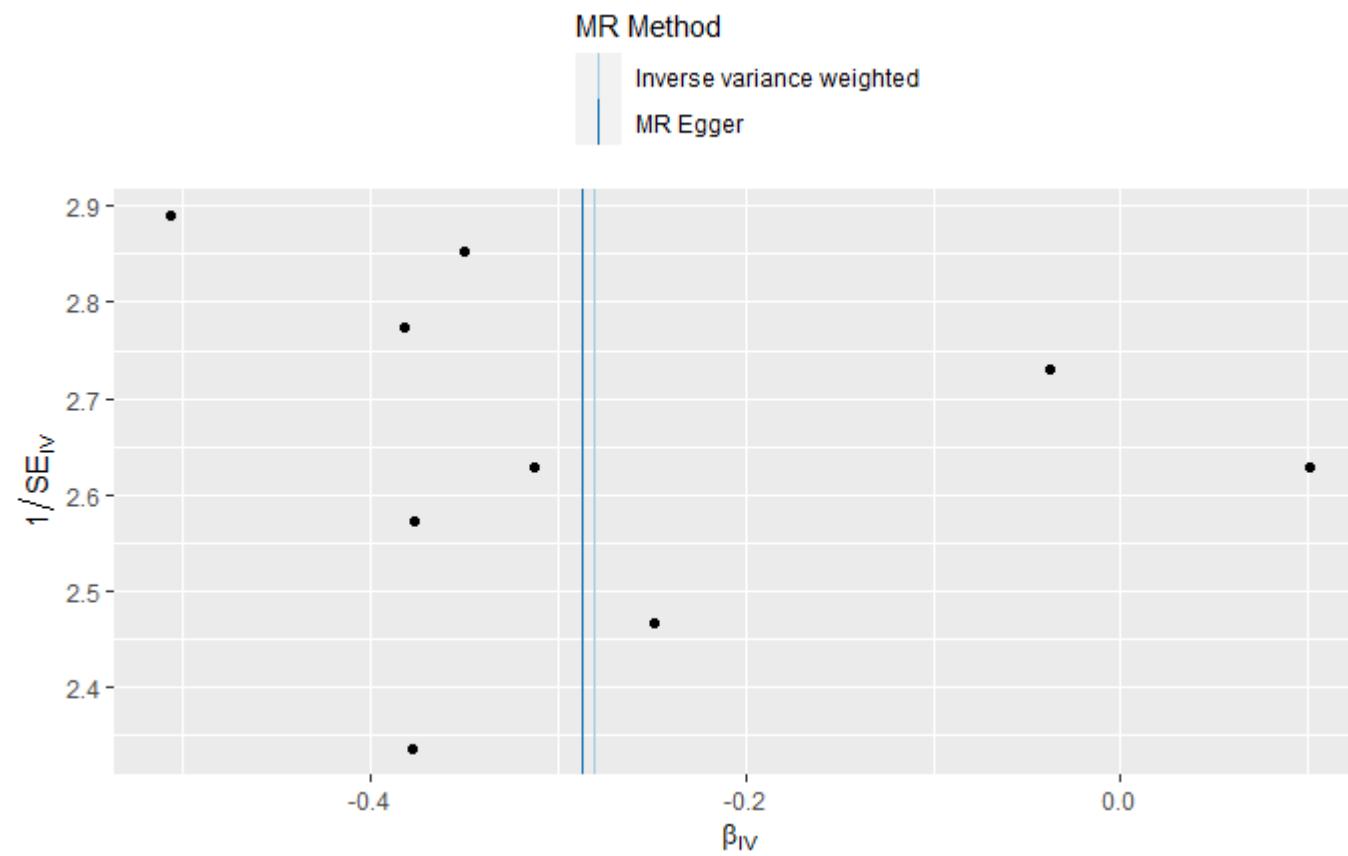

Supplement: Supplementary file 52 [file Oscillospira AT funnel.pdf › Supplementary Figure Files 1 funnel plot/Oscillospira AT funnel.pdf]

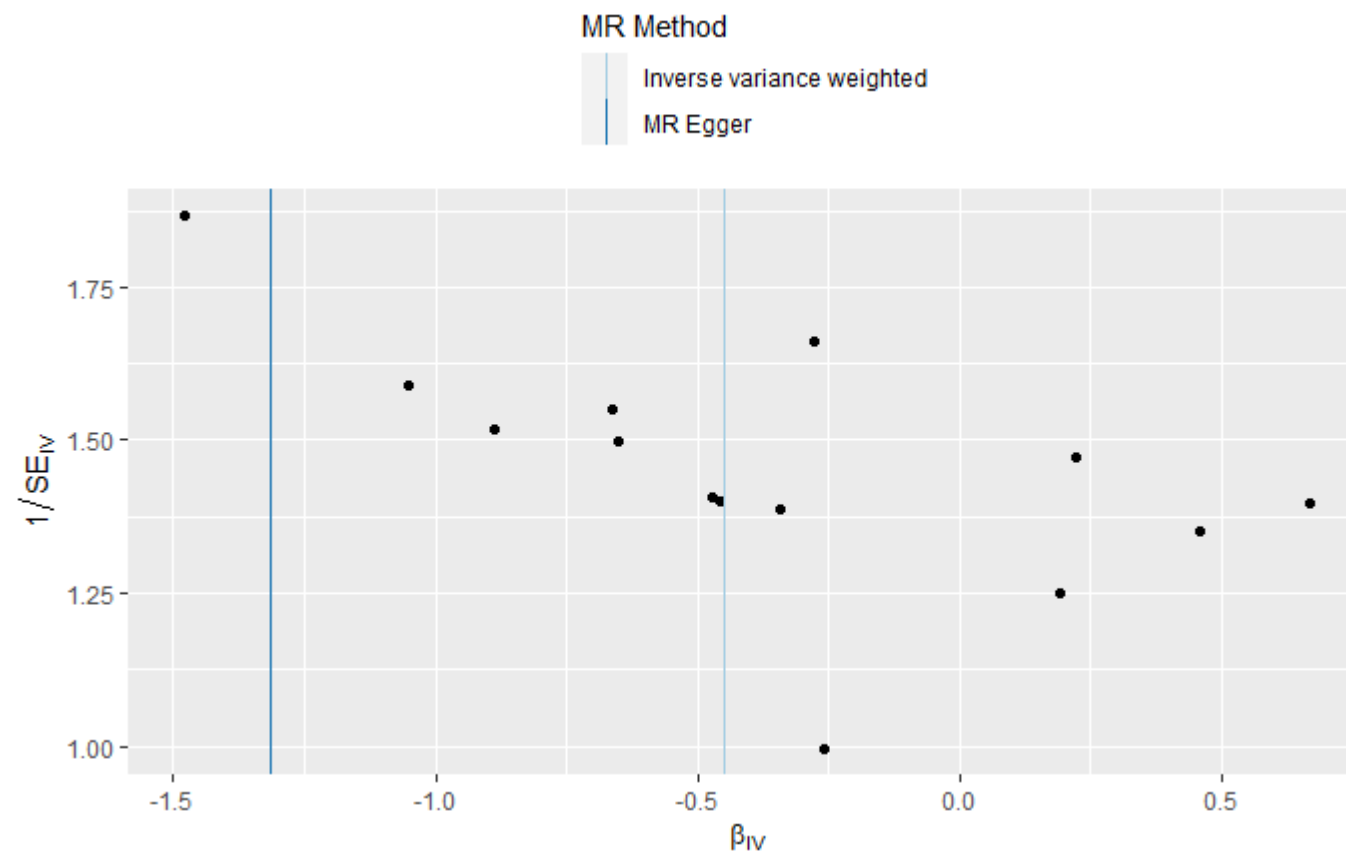

Supplement: Supplementary file 53 [file Romboutsia BT funnel.pdf › Supplementary Figure Files 1 funnel plot/Romboutsia BT funnel.pdf]

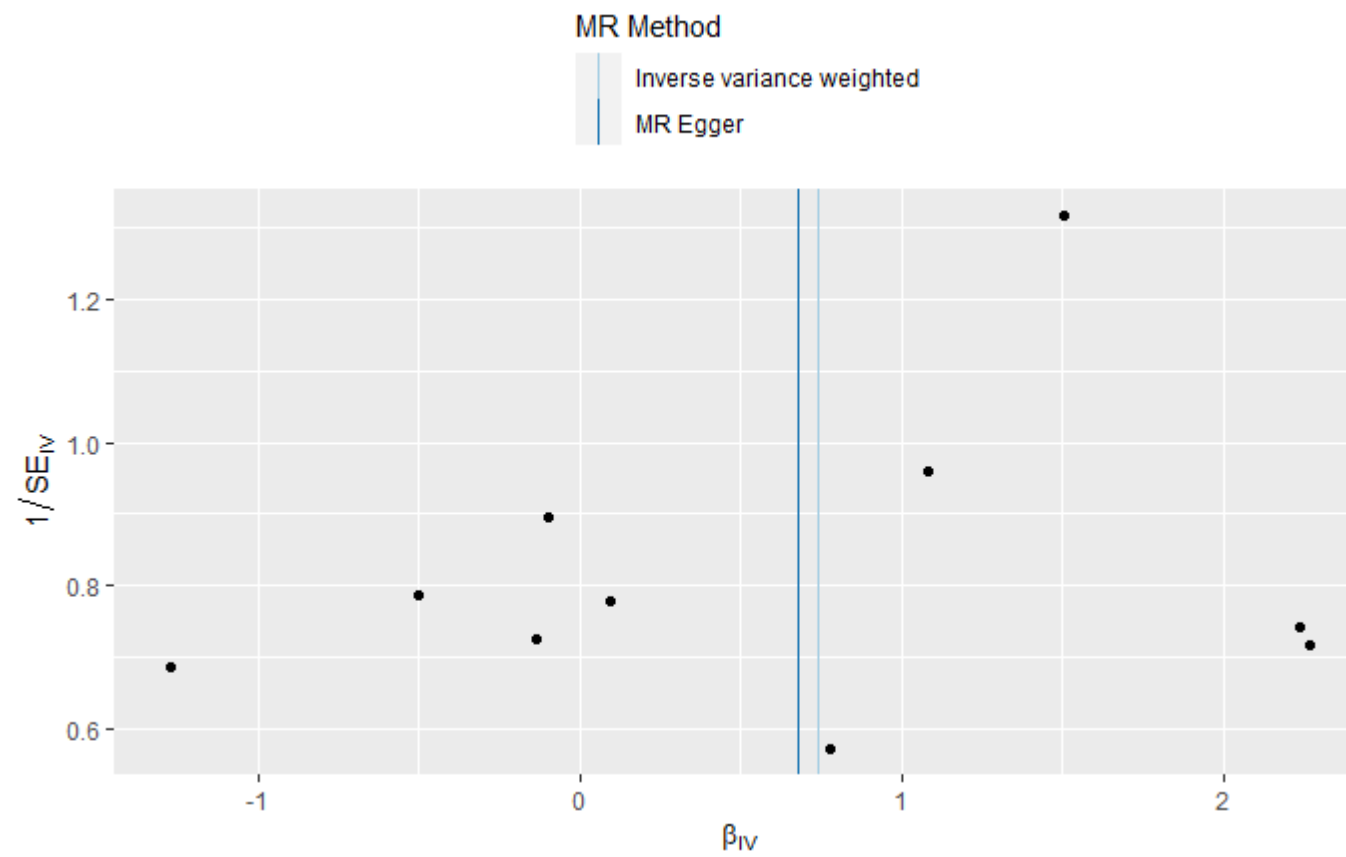

Supplement: Supplementary file 54 [file Ruminococcaceae PT funnel.pdf › Supplementary Figure Files 1 funnel plot/Ruminococcaceae PT funnel.pdf]



Supplement: Supplementary file 55 [file RuminococcaceaeUCG GT funnel.pdf › Supplementary Figure Files 1 funnel plot/RuminococcaceaeUCG GT funnel.pdf]

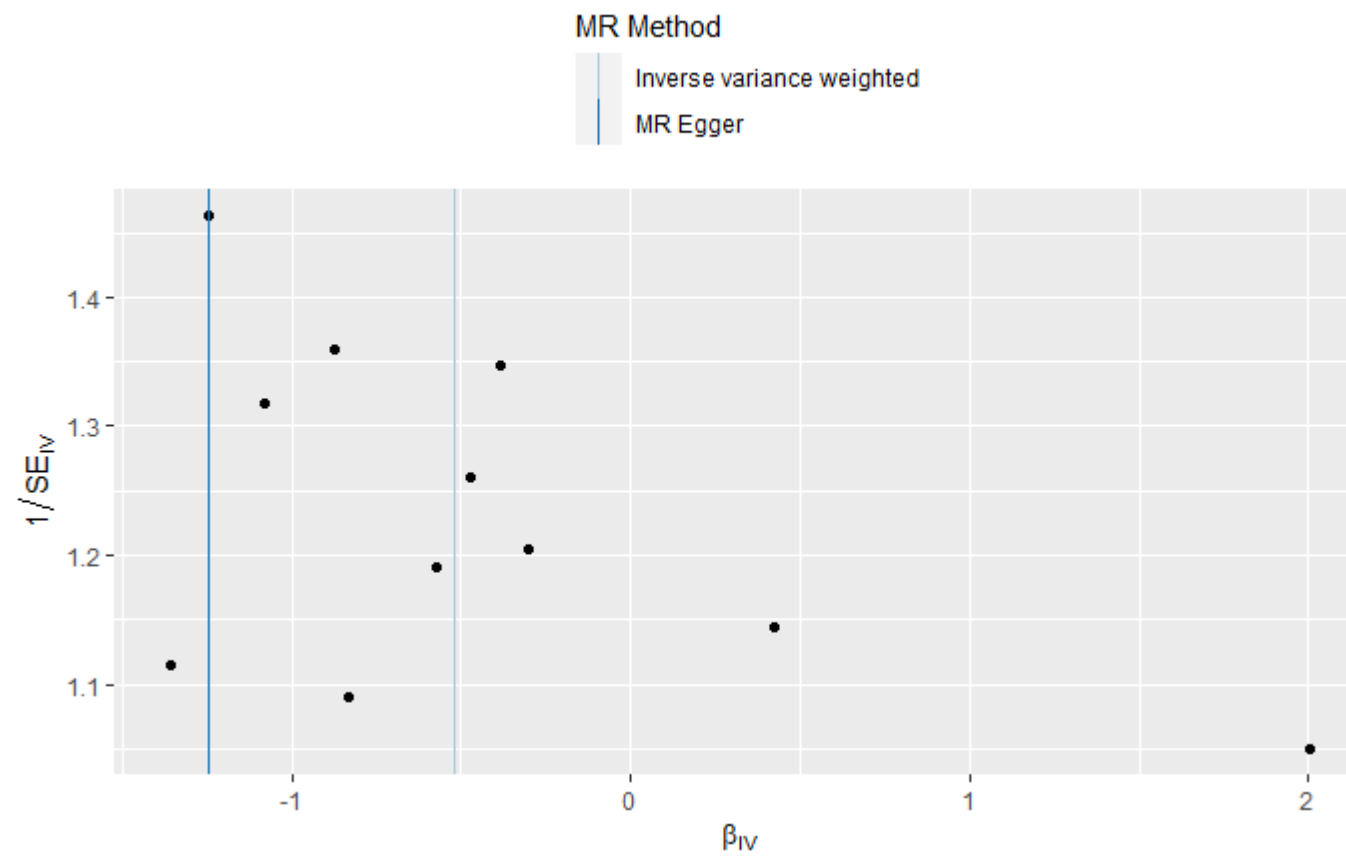

Supplement: Supplementary file 56 [file Ruminococcusgnavus PT funnel.pdf › Supplementary Figure Files 1 funnel plot/Ruminococcusgnavus PT funnel.pdf]



Supplement: Supplementary file 57 [file Subdoligranulum AT funnel.pdf › Supplementary Figure Files 1 funnel plot/Subdoligranulum AT funnel.pdf]

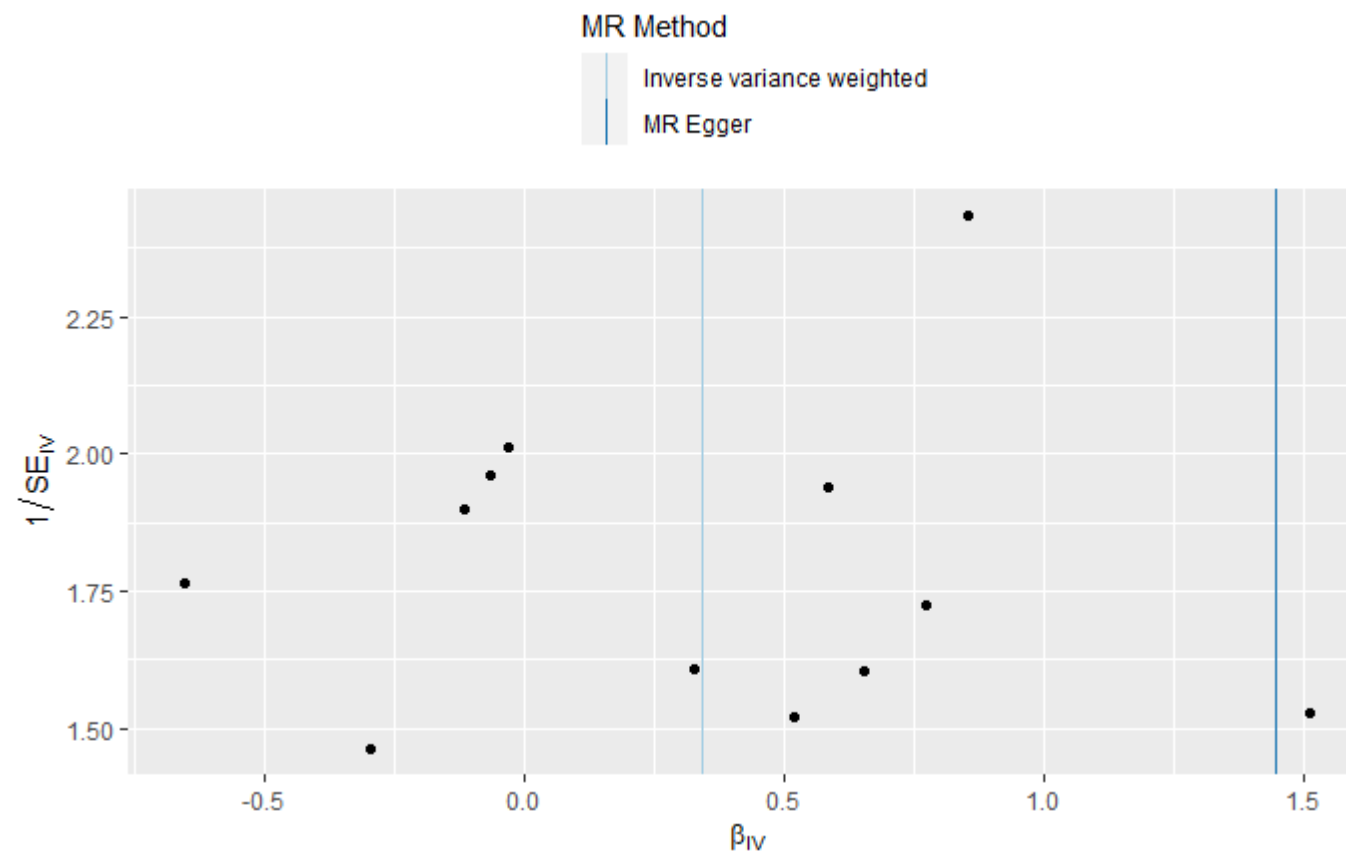

Supplement: Supplementary file 58 [file Tenericutes ST funnel.pdf › Supplementary Figure Files 1 funnel plot/Tenericutes ST funnel.pdf]

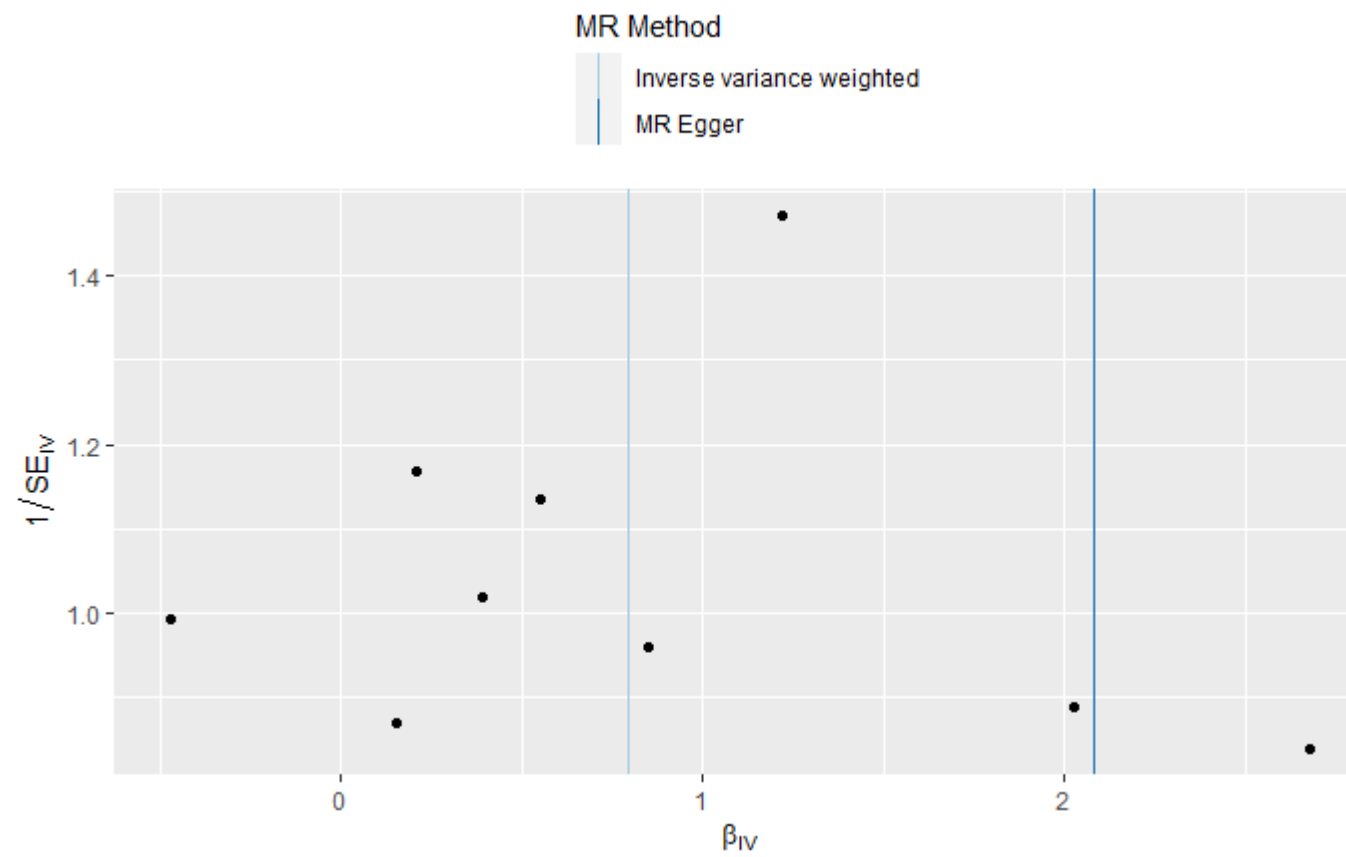

Supplement: Supplementary file 59 [file Turicibacter PT funnel.pdf › Supplementary Figure Files 1 funnel plot/Turicibacter PT funnel.pdf]



Supplement: Supplementary file 60 [file Victivallaceae BT funnel.pdf › Supplementary Figure Files 1 funnel plot/Victivallaceae BT funnel.pdf]



Supplement: Supplementary file 61 [file unknowngenus BT funnel.pdf › Supplementary Figure Files 1 funnel plot/unknowngenus BT funnel.pdf]

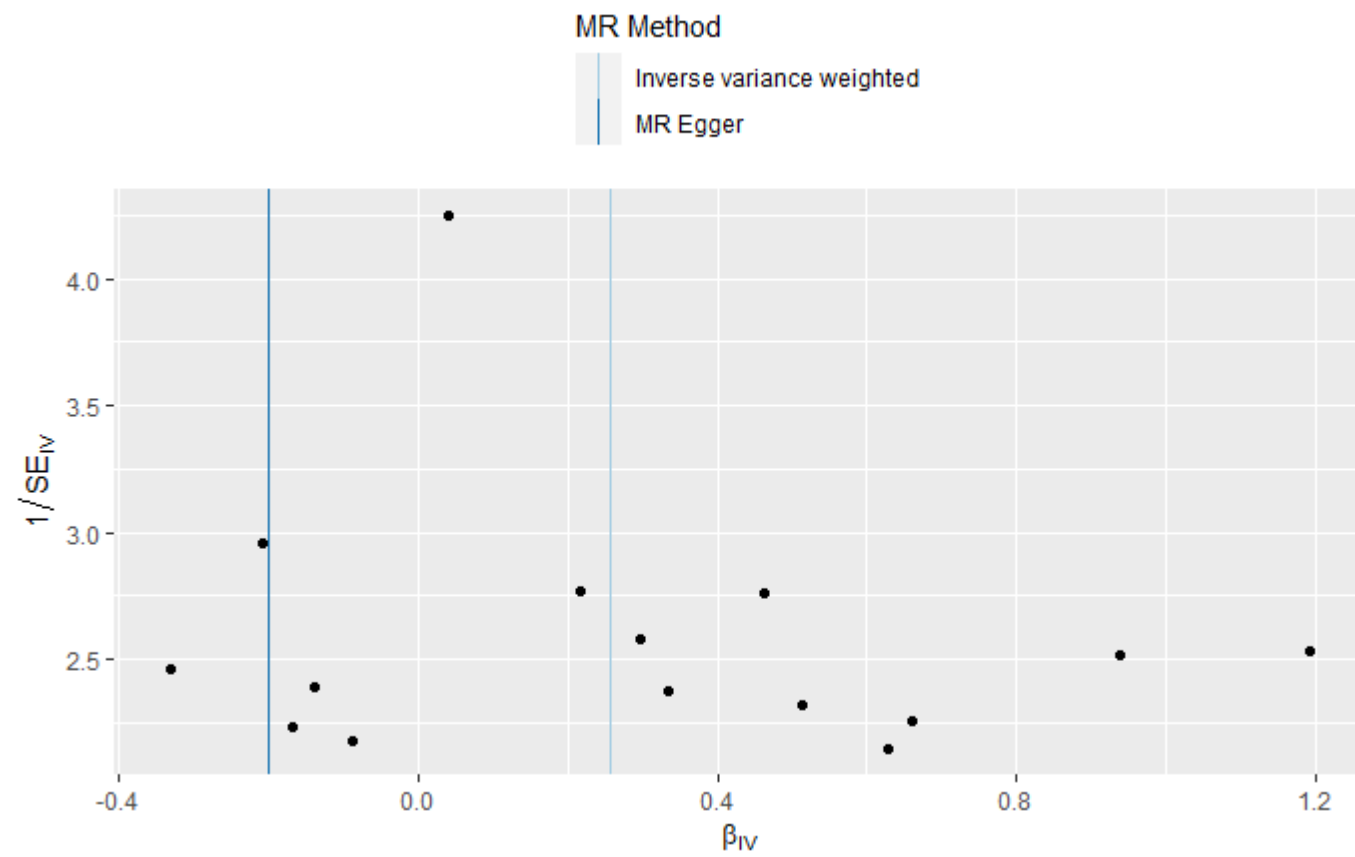

Supplement: Supplementary file 62 [file unknowngenus073 AT funnel.pdf › Supplementary Figure Files 1 funnel plot/unknowngenus073 AT funnel.pdf]

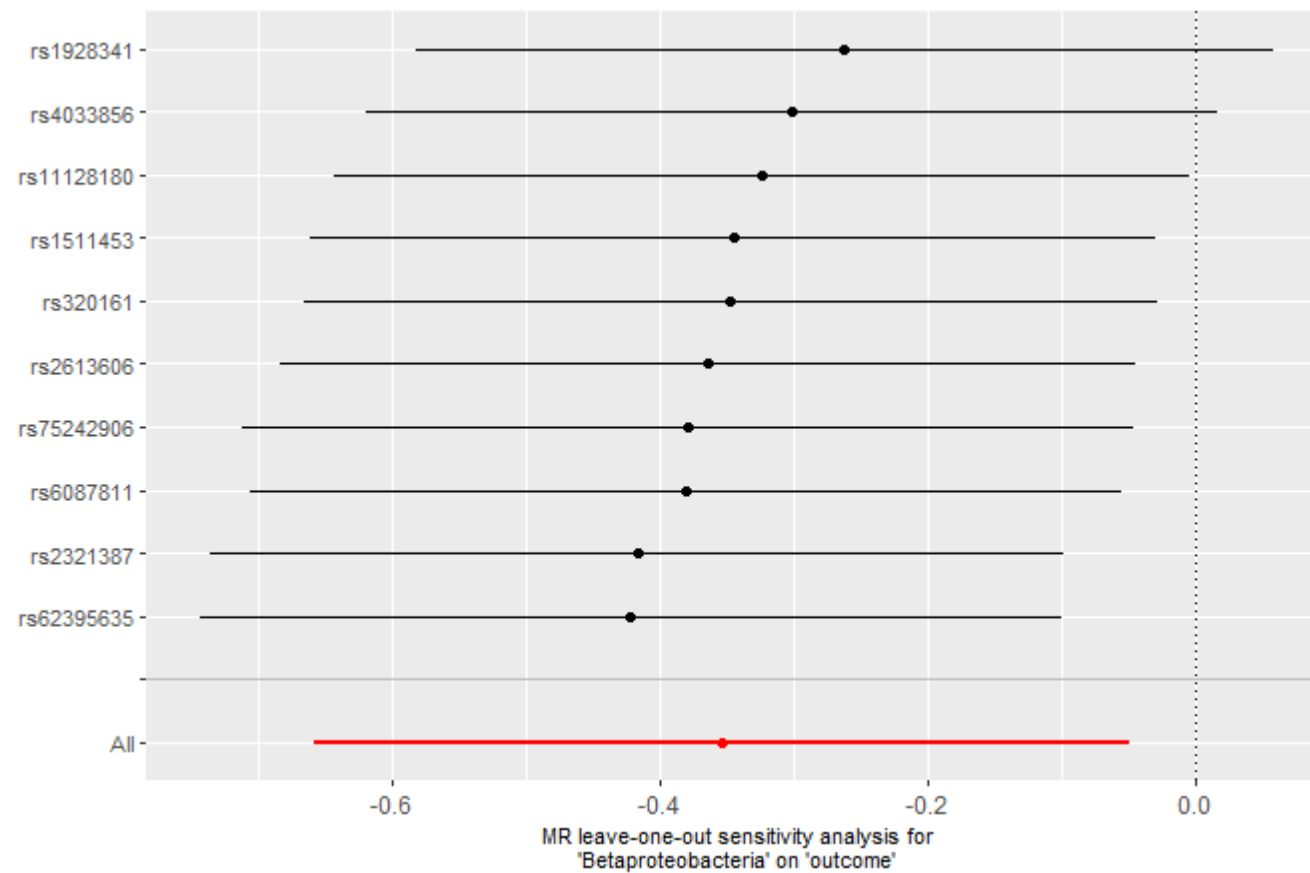

Supplement: Supplementary file 63 [file Betaproteobacteria with AT leave-one-out Rplot.pdf › 111/Betaproteobacteria with AT leave-one-out Rplot.pdf]

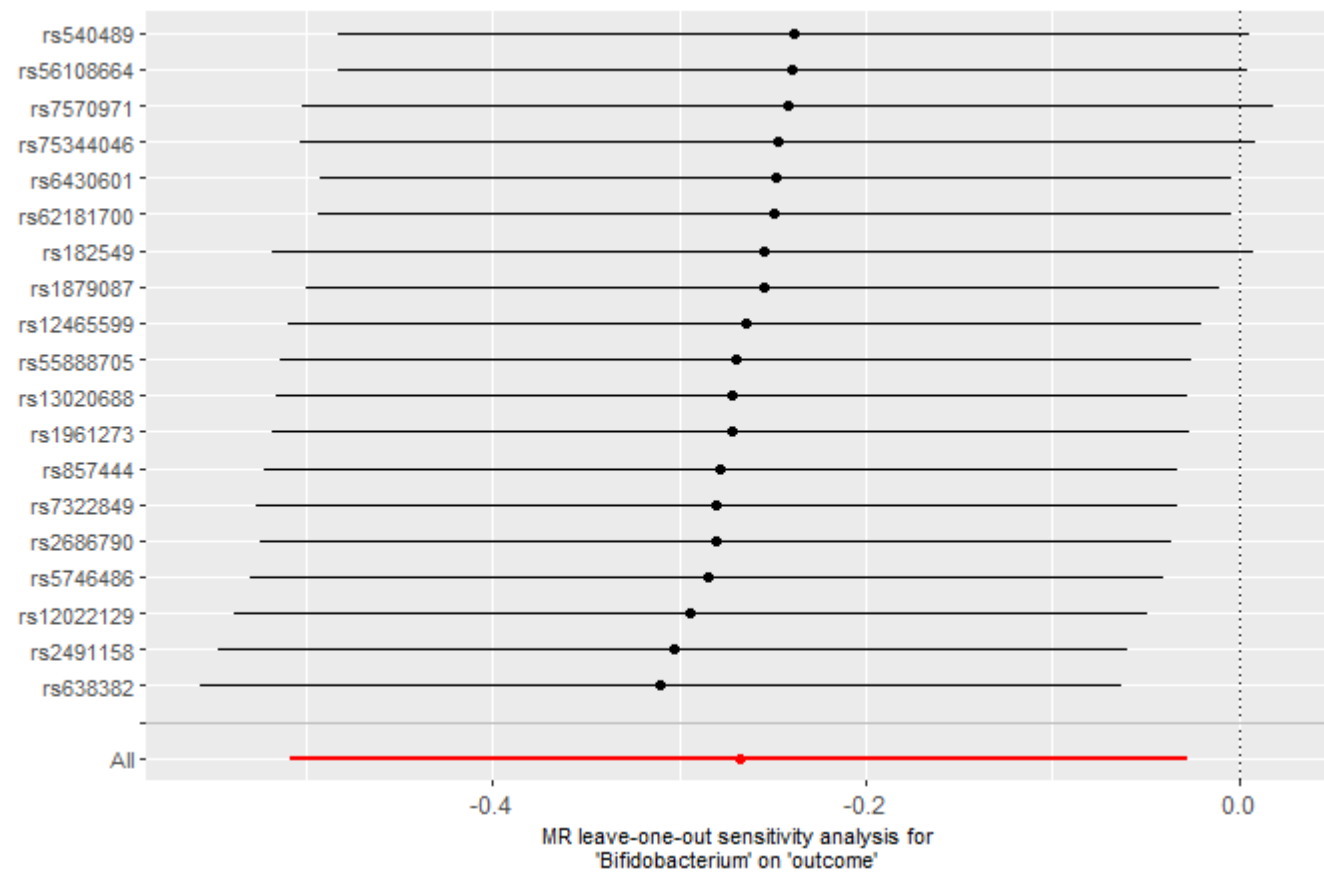

Supplement: Supplementary file 64 [file Bifidobacterium ST leaveoneout.pdf › 111/Bifidobacterium ST leaveoneout.pdf]

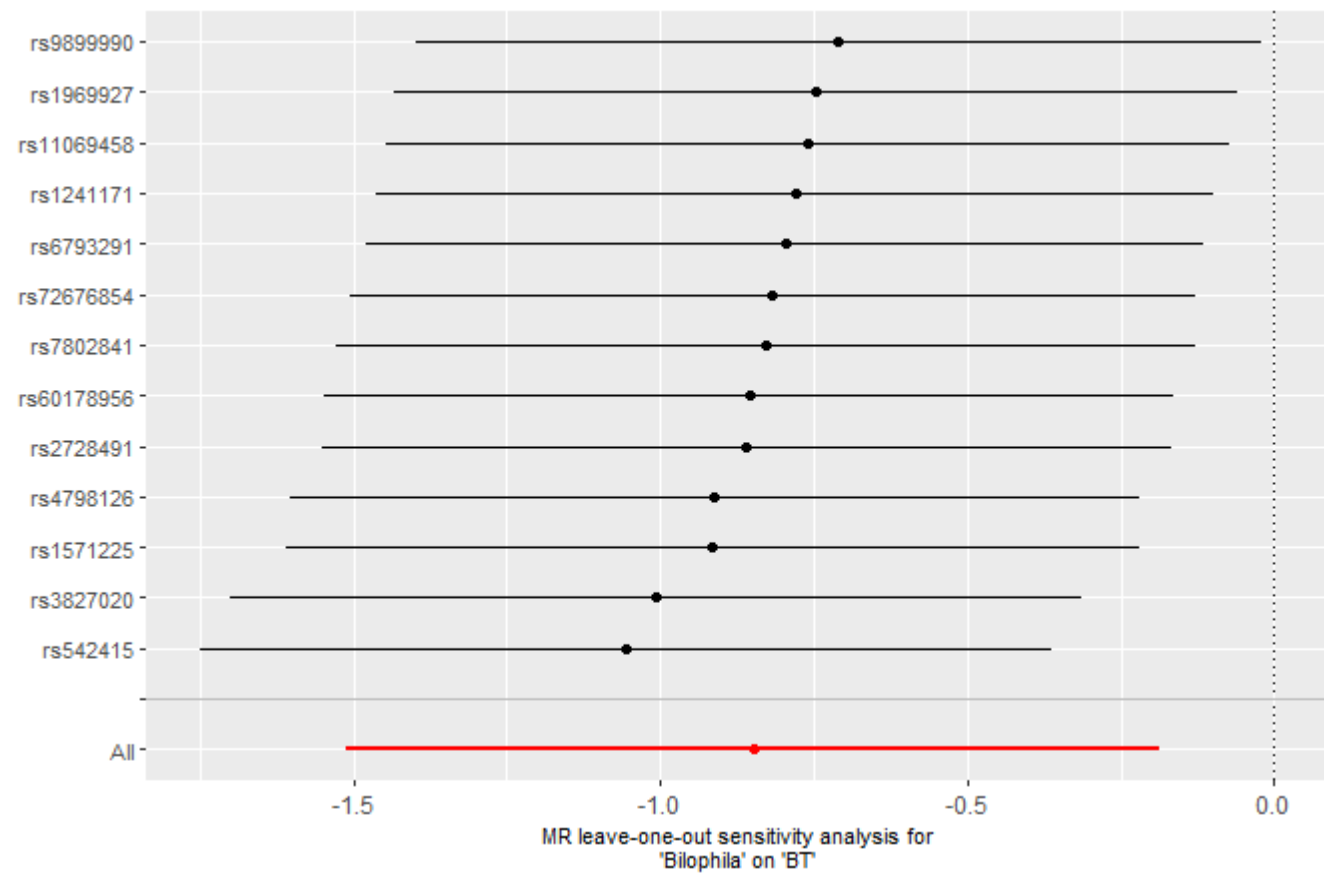

Supplement: Supplementary file 65 [file Bilophila PT leaveoneout.pdf › 111/Bilophila PT leaveoneout.pdf]

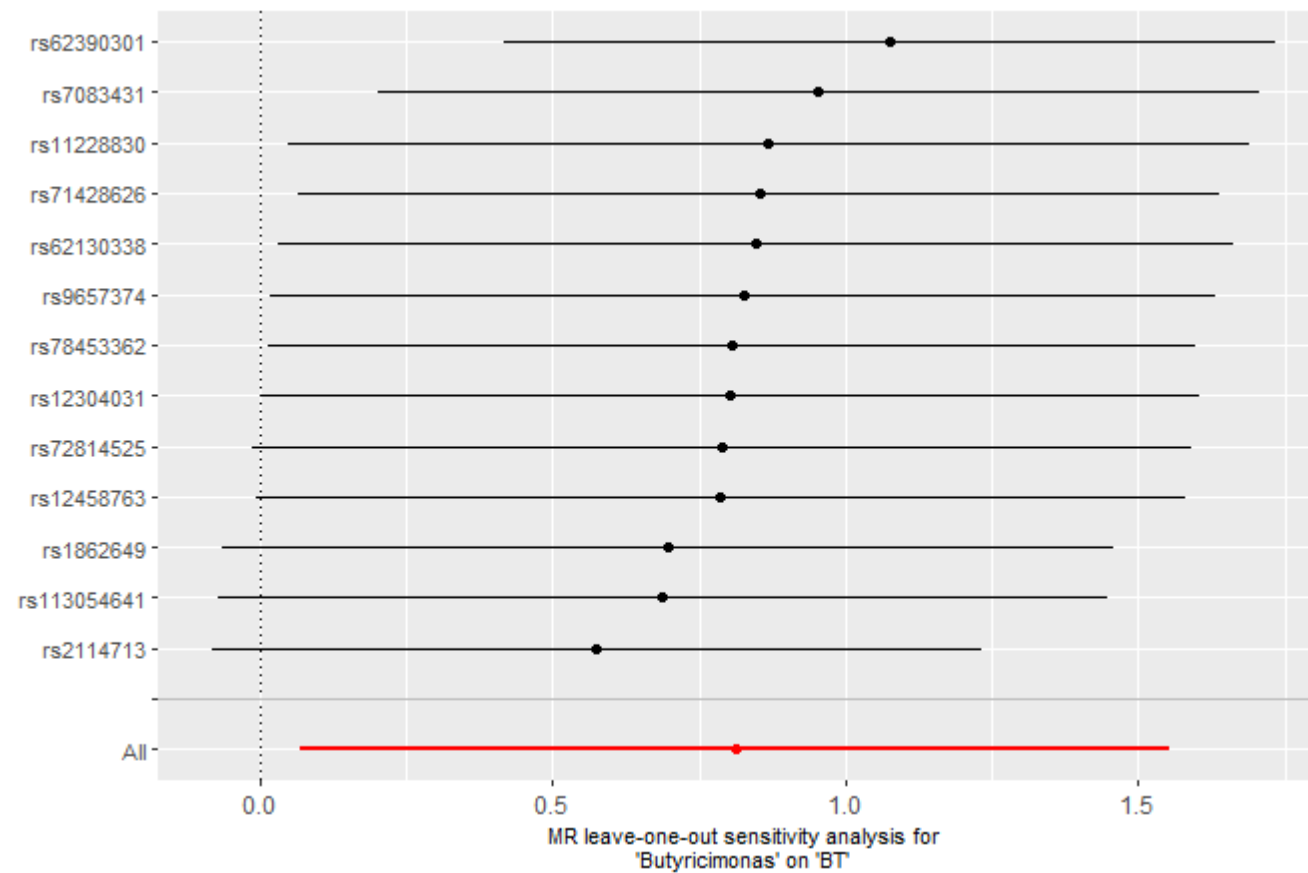

Supplement: Supplementary file 66 [file Butyricimonas PT leaveoneout.pdf › 111/Butyricimonas PT leaveoneout.pdf]

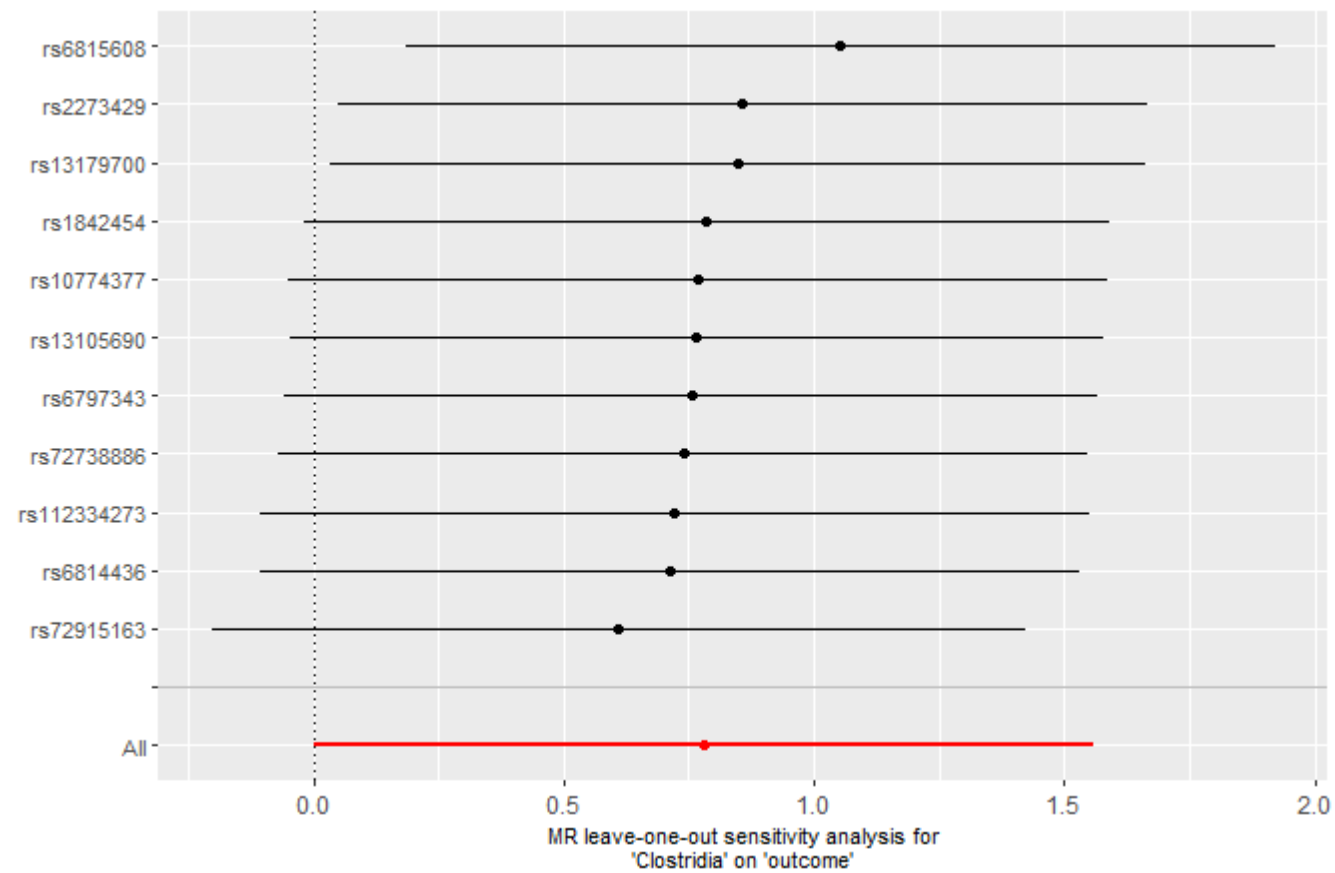

Supplement: Supplementary file 67 [file Clostridia GT leaveoneout.pdf › 111/Clostridia GT leaveoneout.pdf]

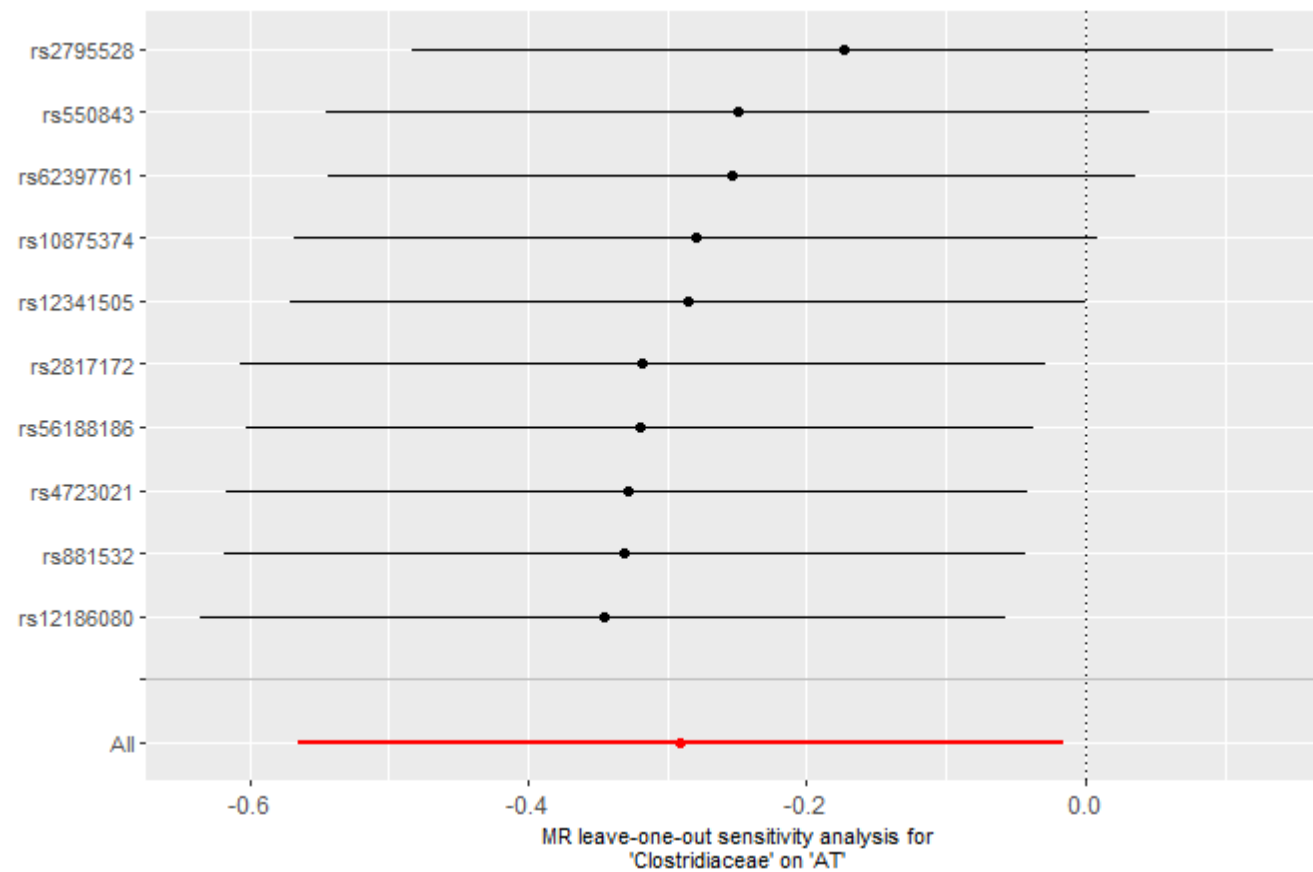

Supplement: Supplementary file 68 [file Clostridiaceae AT leaveoneout.pdf › 111/Clostridiaceae AT leaveoneout.pdf]

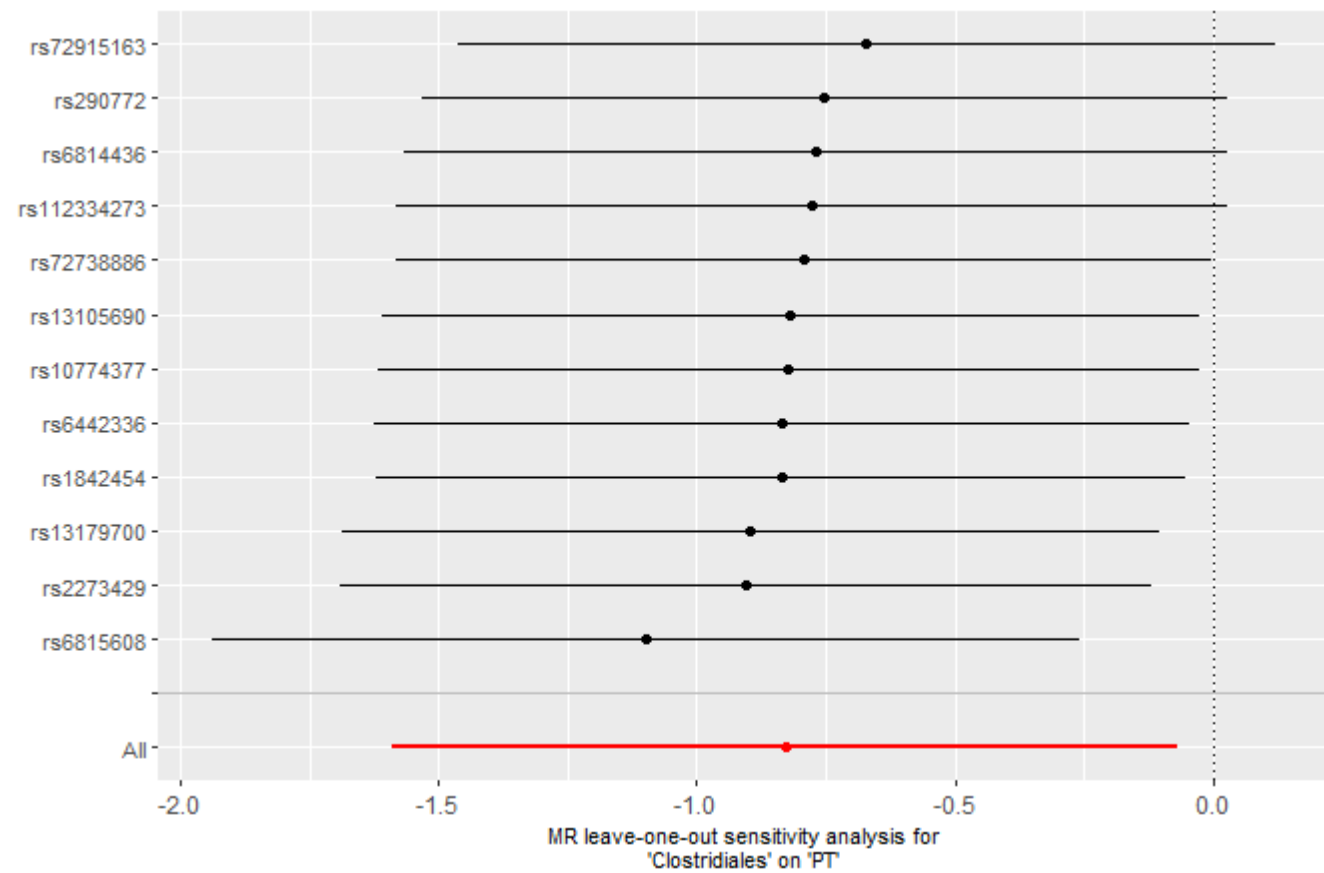

Supplement: Supplementary file 69 [file Clostridiales PT leaveoneout.pdf › 111/Clostridiales PT leaveoneout.pdf]

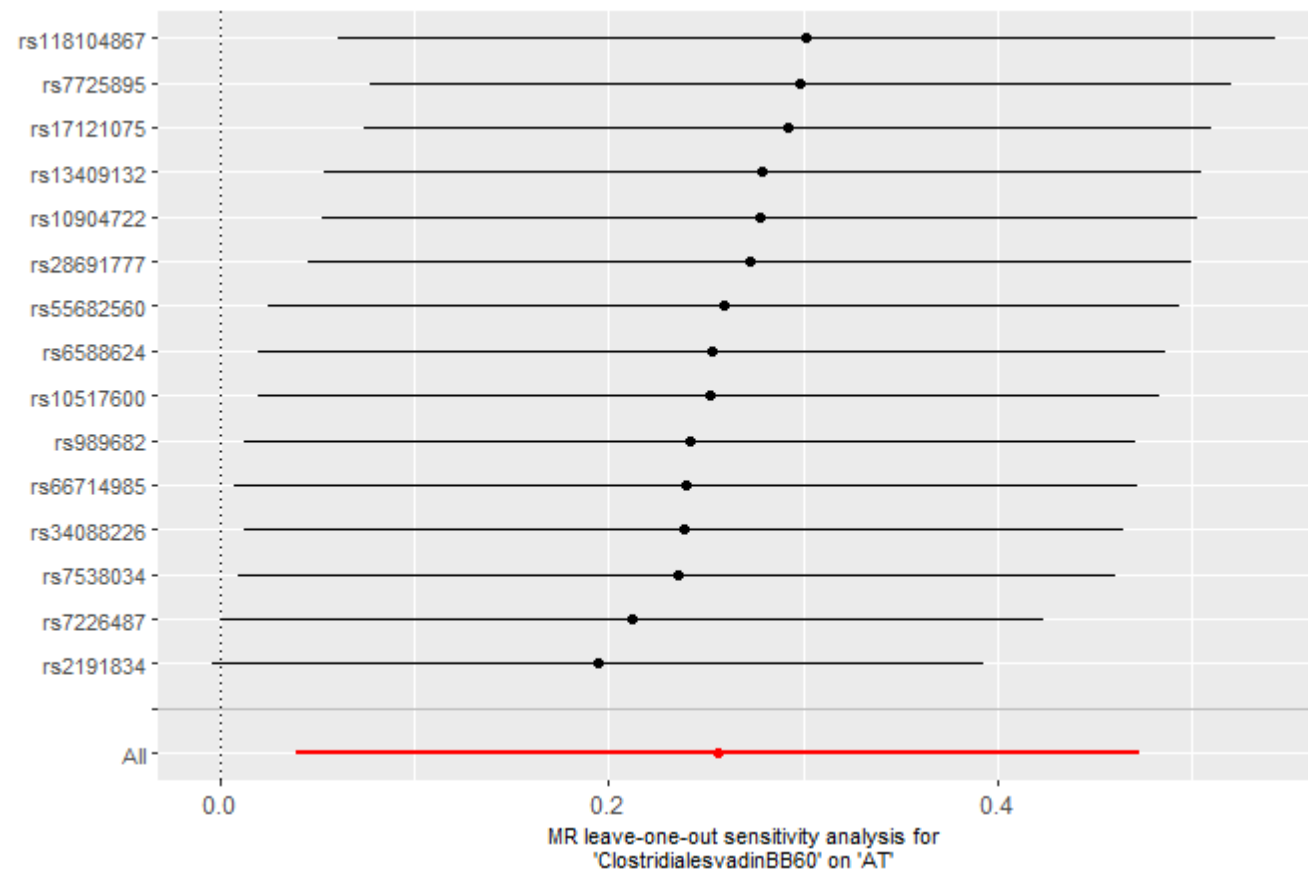

Supplement: Supplementary file 70 [file ClostridialesvadinBB60 AT leaveoneout.pdf › 111/ClostridialesvadinBB60 AT leaveoneout.pdf]

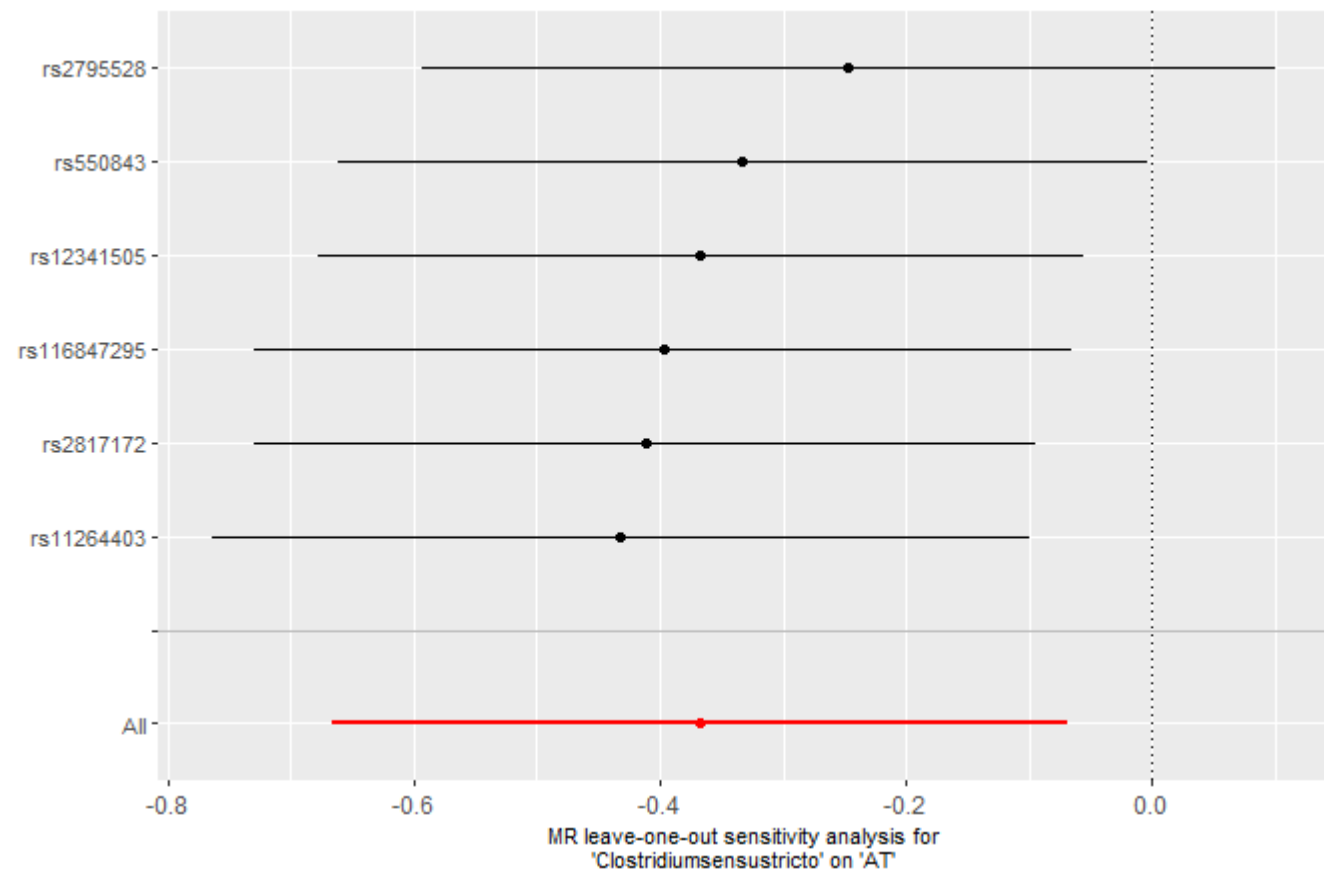

Supplement: Supplementary file 71 [file Clostridiumsensustricto AT leaveoneout.pdf › 111/Clostridiumsensustricto AT leaveoneout.pdf]

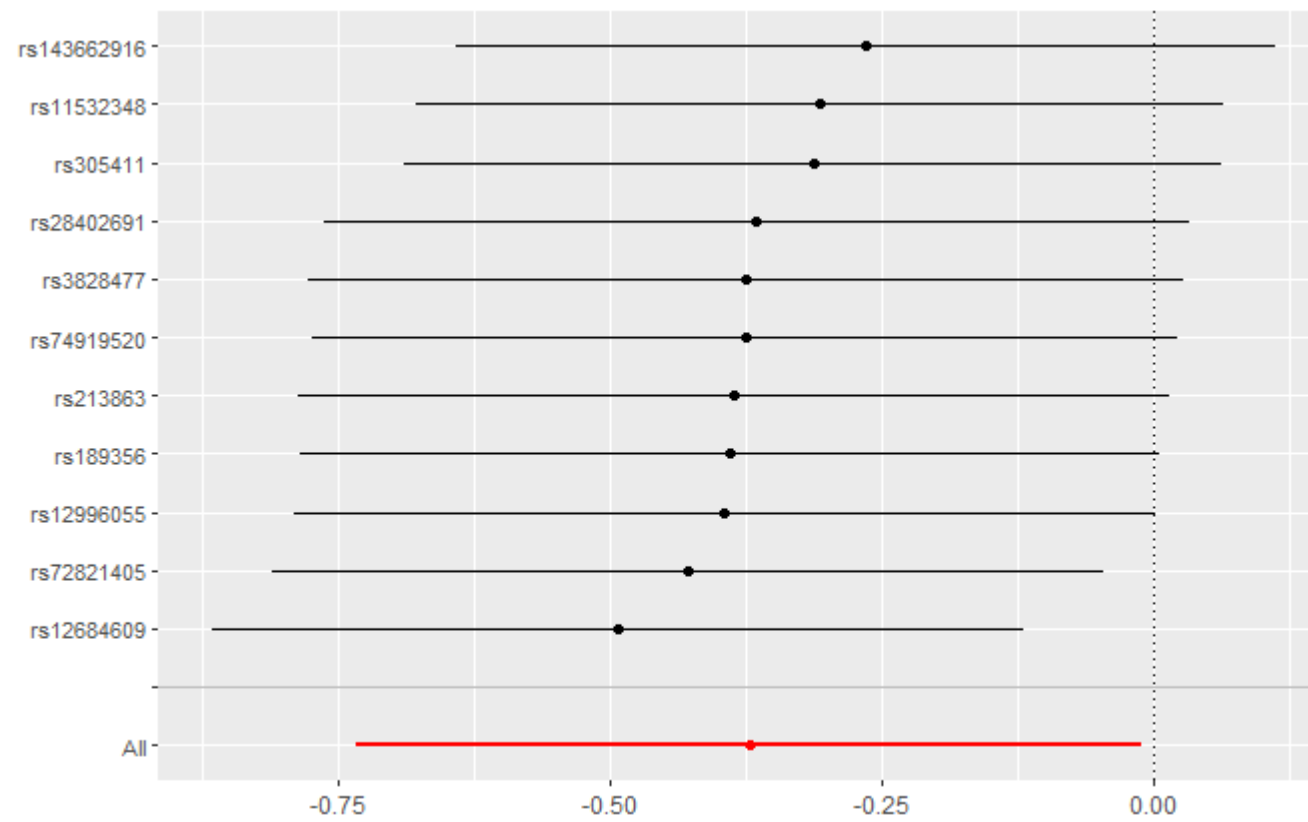

Supplement: Supplementary file 72 [file Coprobacter GT leaveoneout.pdf › 111/Coprobacter GT leaveoneout.pdf]

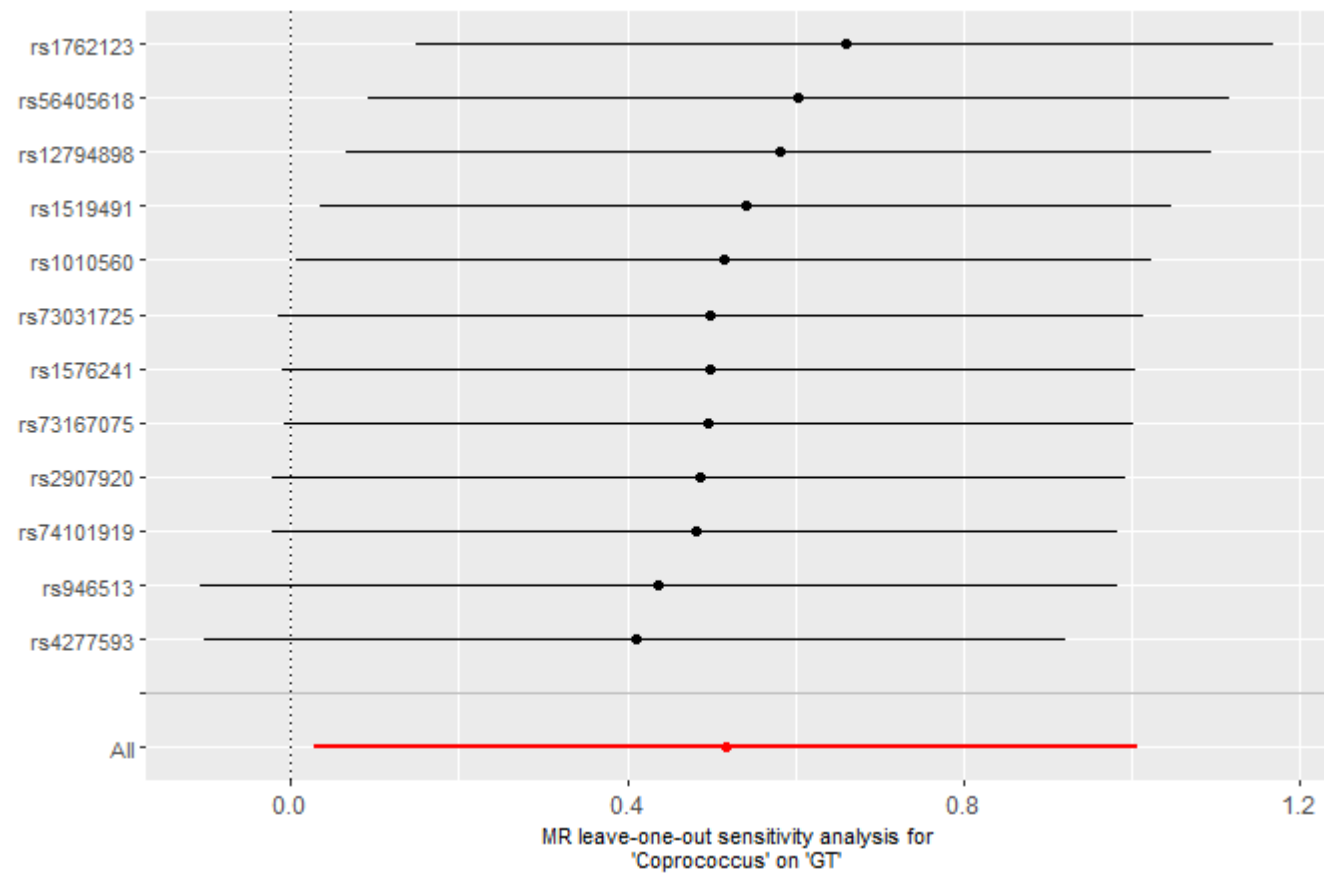

Supplement: Supplementary file 73 [file Coprococcus GT leaveoneout.pdf › 111/Coprococcus GT leaveoneout.pdf]

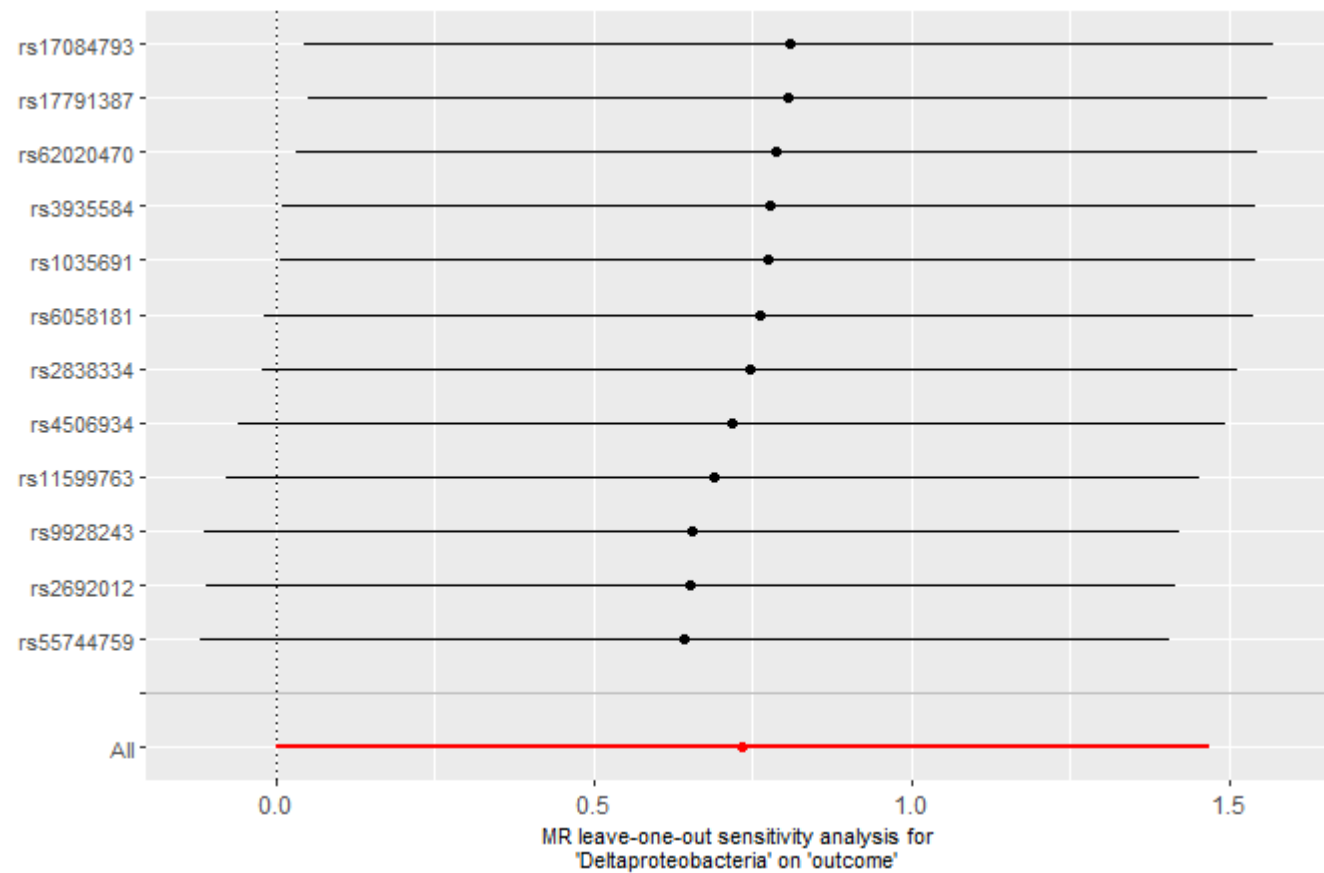

Supplement: Supplementary file 74 [file Deltaproteobacteria GT leaveoneout.pdf › 111/Deltaproteobacteria GT leaveoneout.pdf]

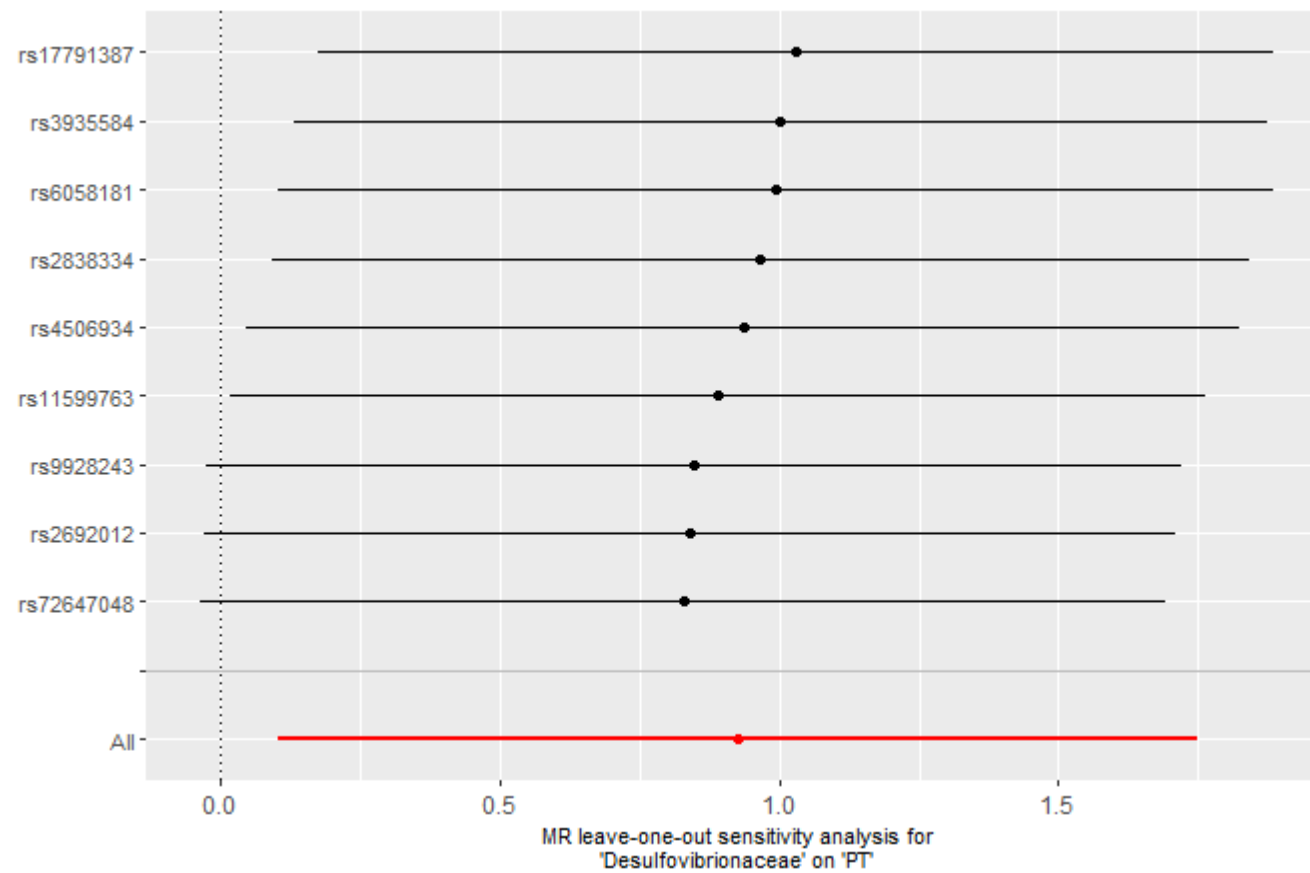

Supplement: Supplementary file 75 [file Desulfovibrionaceae PT leaveoneout.pdf › 111/Desulfovibrionaceae PT leaveoneout.pdf]

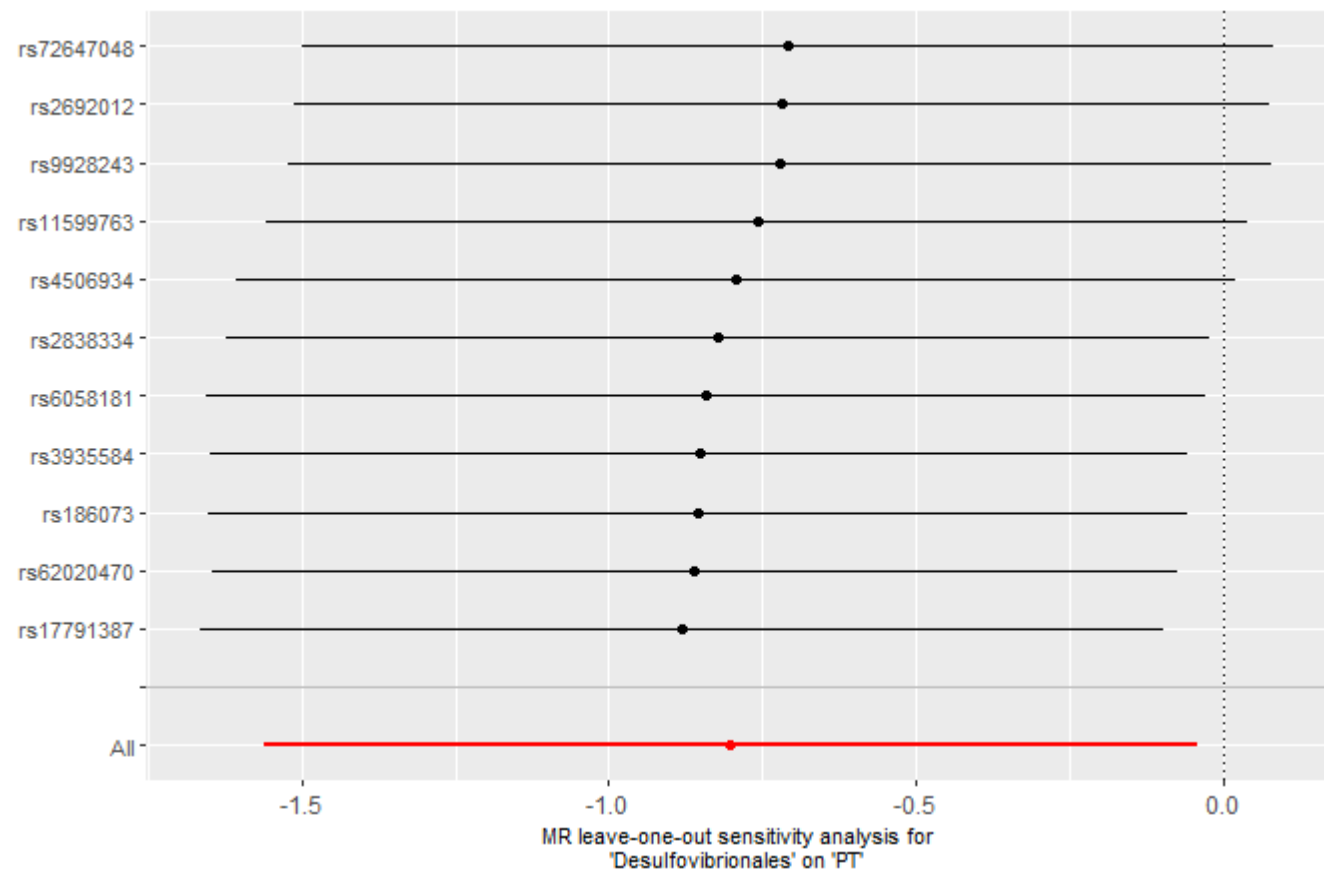

Supplement: Supplementary file 76 [file Desulfovibrionales PT leaveoneout.pdf › 111/Desulfovibrionales PT leaveoneout.pdf]

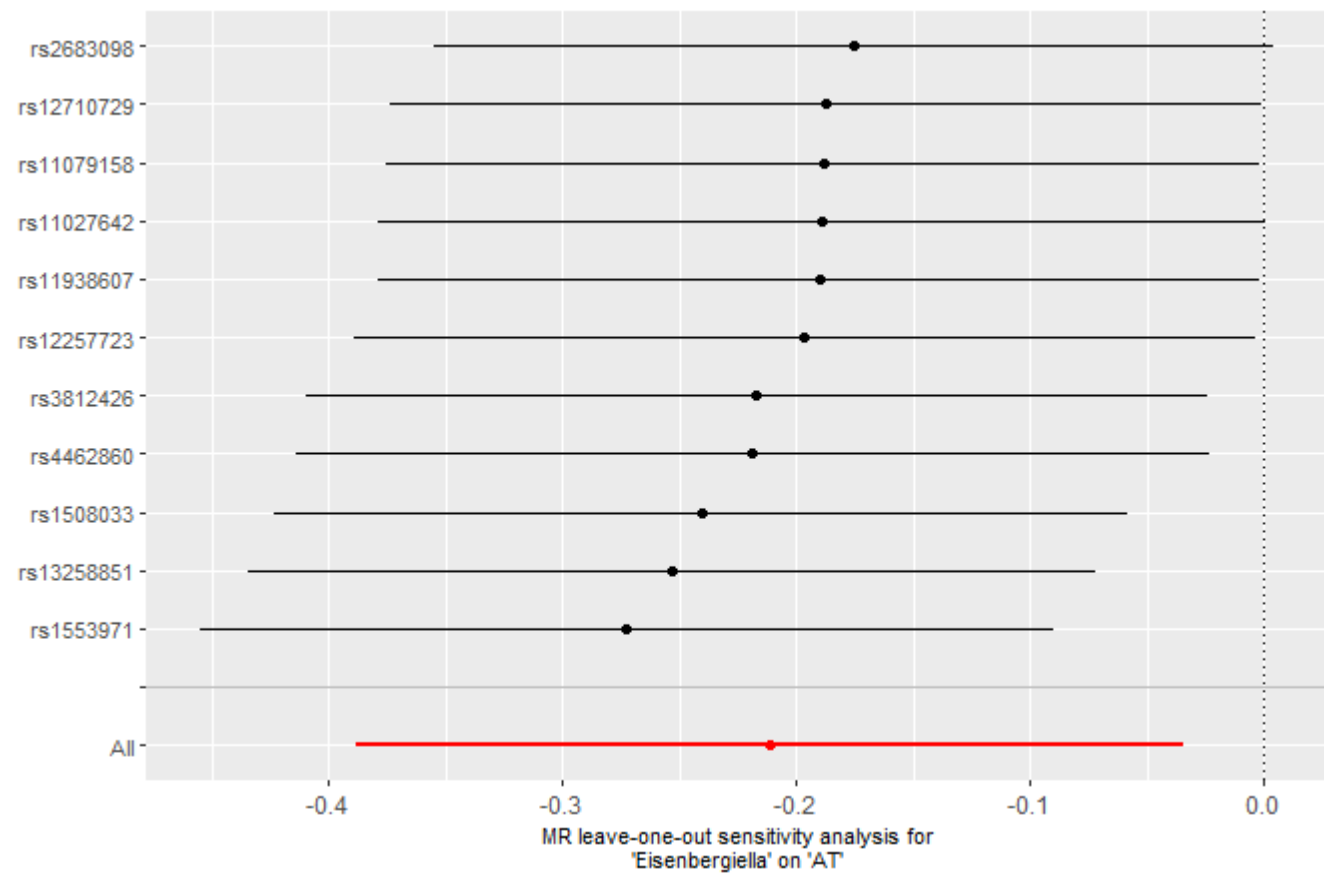

Supplement: Supplementary file 77 [file Eisenbergiella AT leaveoneout.pdf › 111/Eisenbergiella AT leaveoneout.pdf]

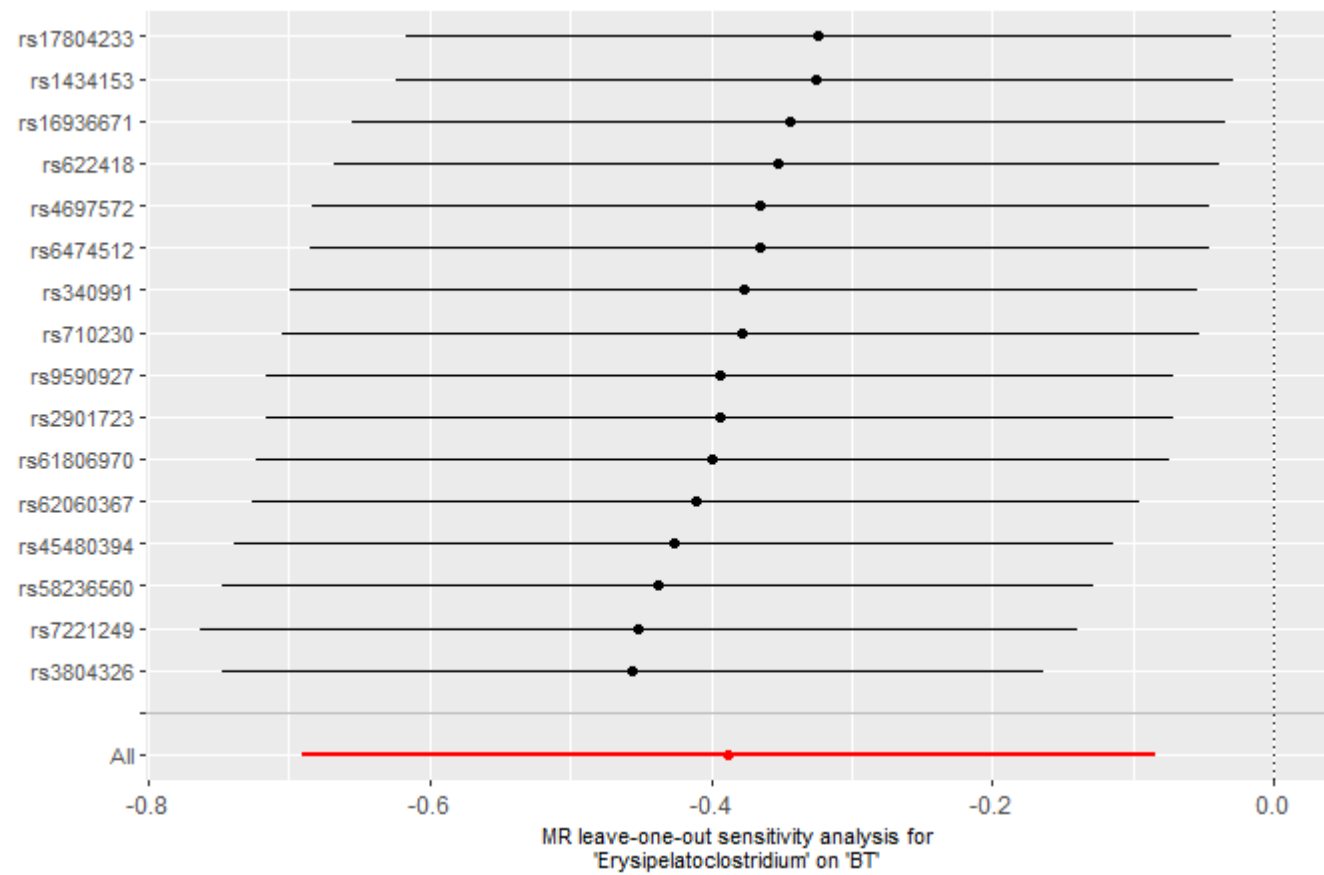

Supplement: Supplementary file 78 [file Erysipelatoclostridium BT leaveoneout.pdf › 111/Erysipelatoclostridium BT leaveoneout.pdf]

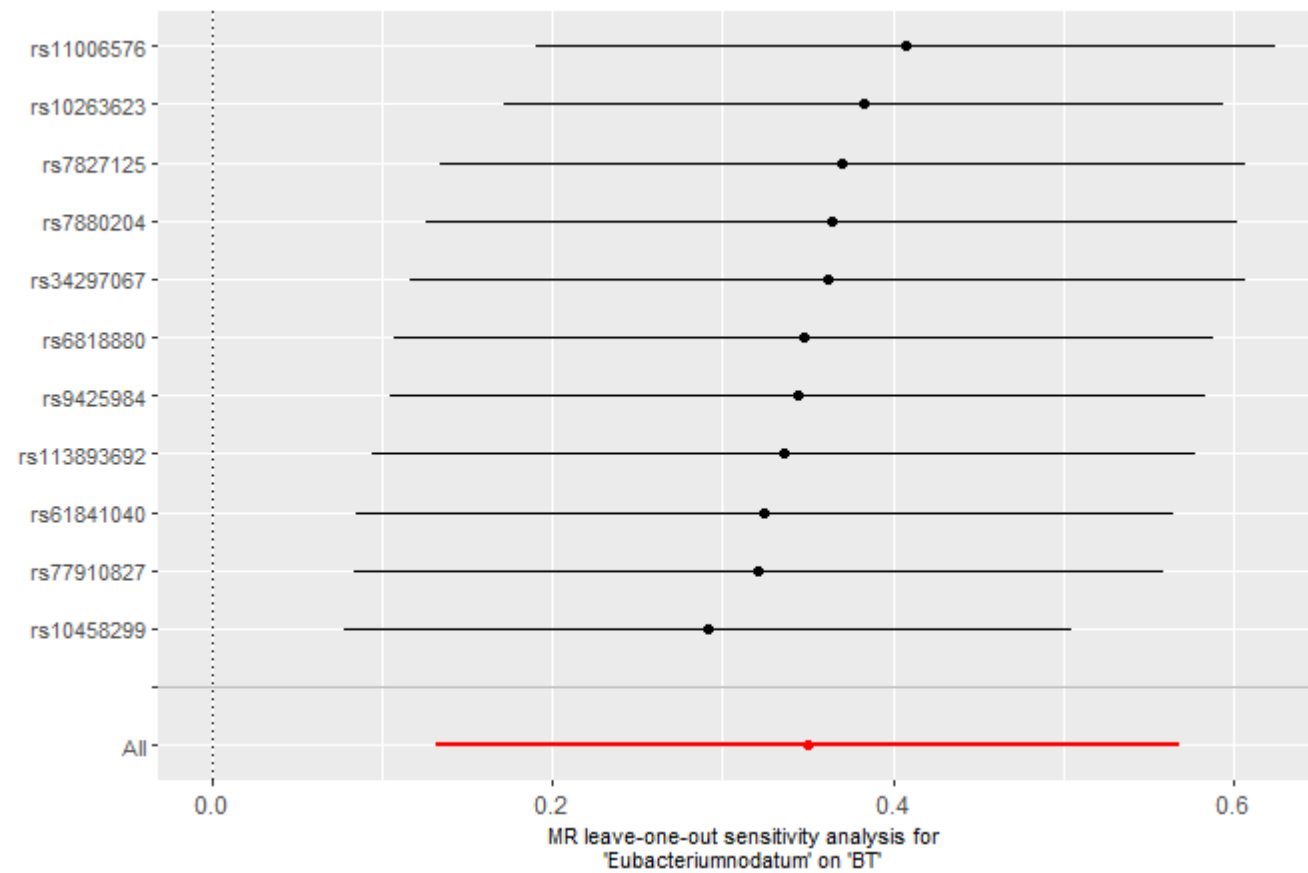

Supplement: Supplementary file 79 [file Eubacteriumnodatum BT leaveoneout.pdf › 111/Eubacteriumnodatum BT leaveoneout.pdf]

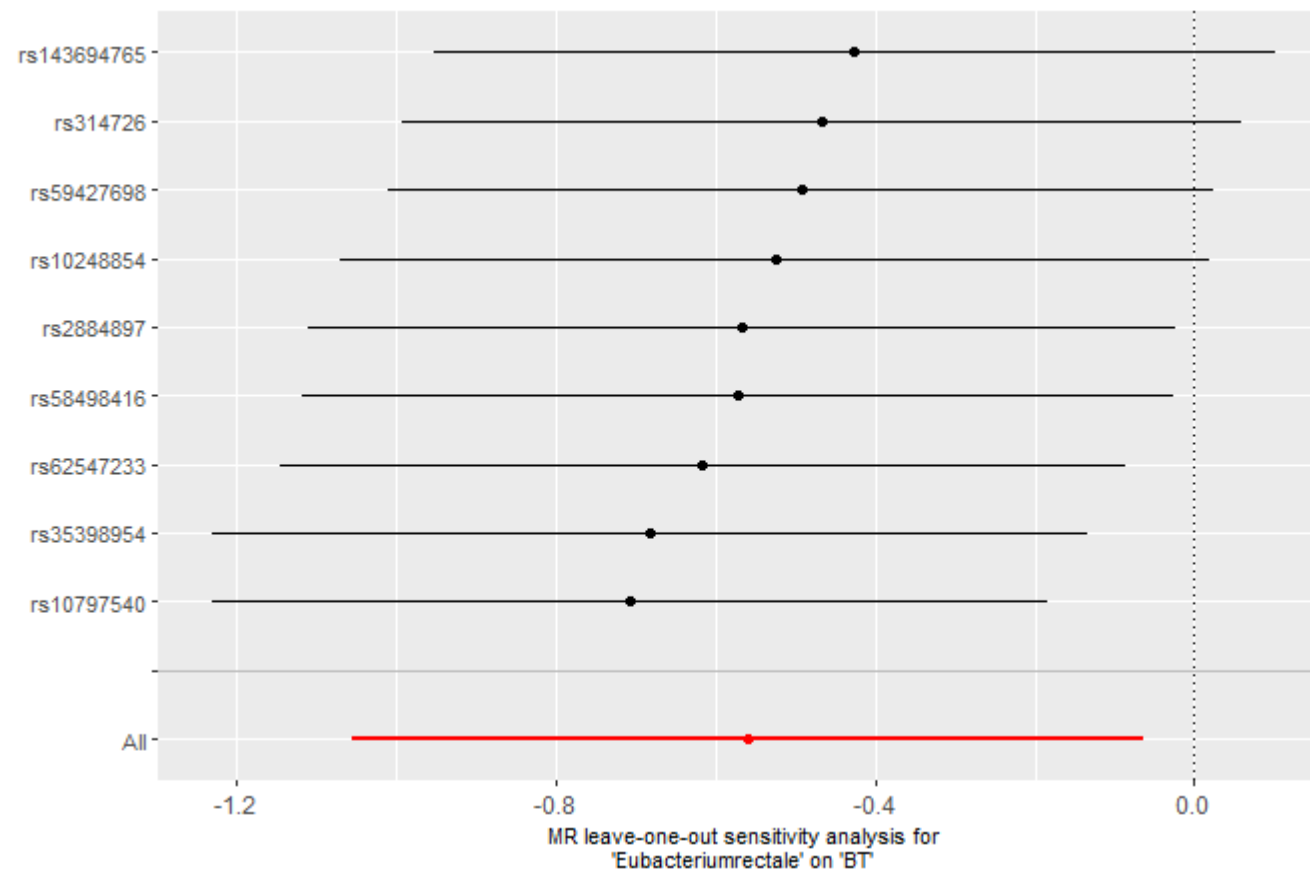

Supplement: Supplementary file 80 [file Eubacteriumrectale BT leaveoneout.pdf › 111/Eubacteriumrectale BT leaveoneout.pdf]

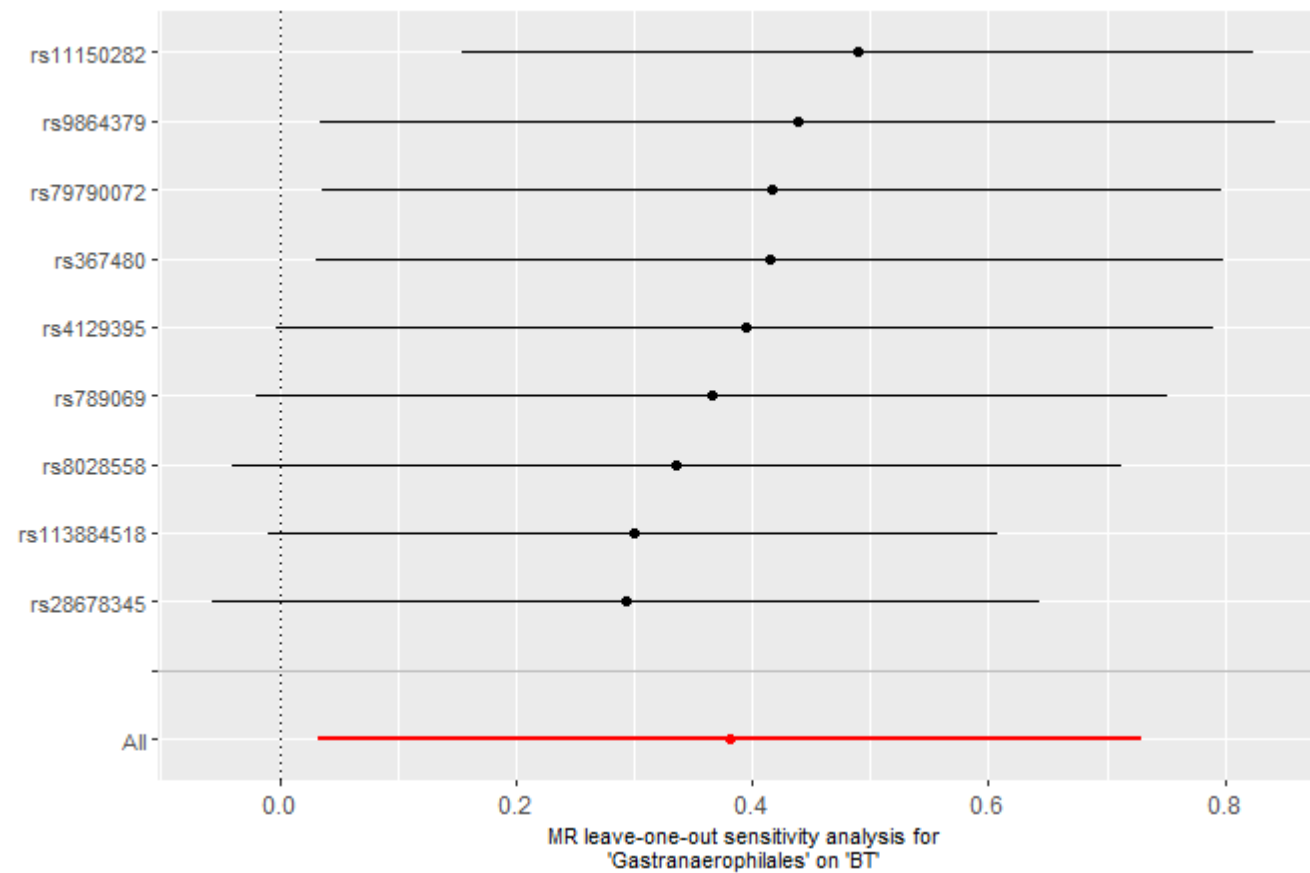

Supplement: Supplementary file 81 [file Gastranaerophilales BT leaveoneout.pdf › 111/Gastranaerophilales BT leaveoneout.pdf]

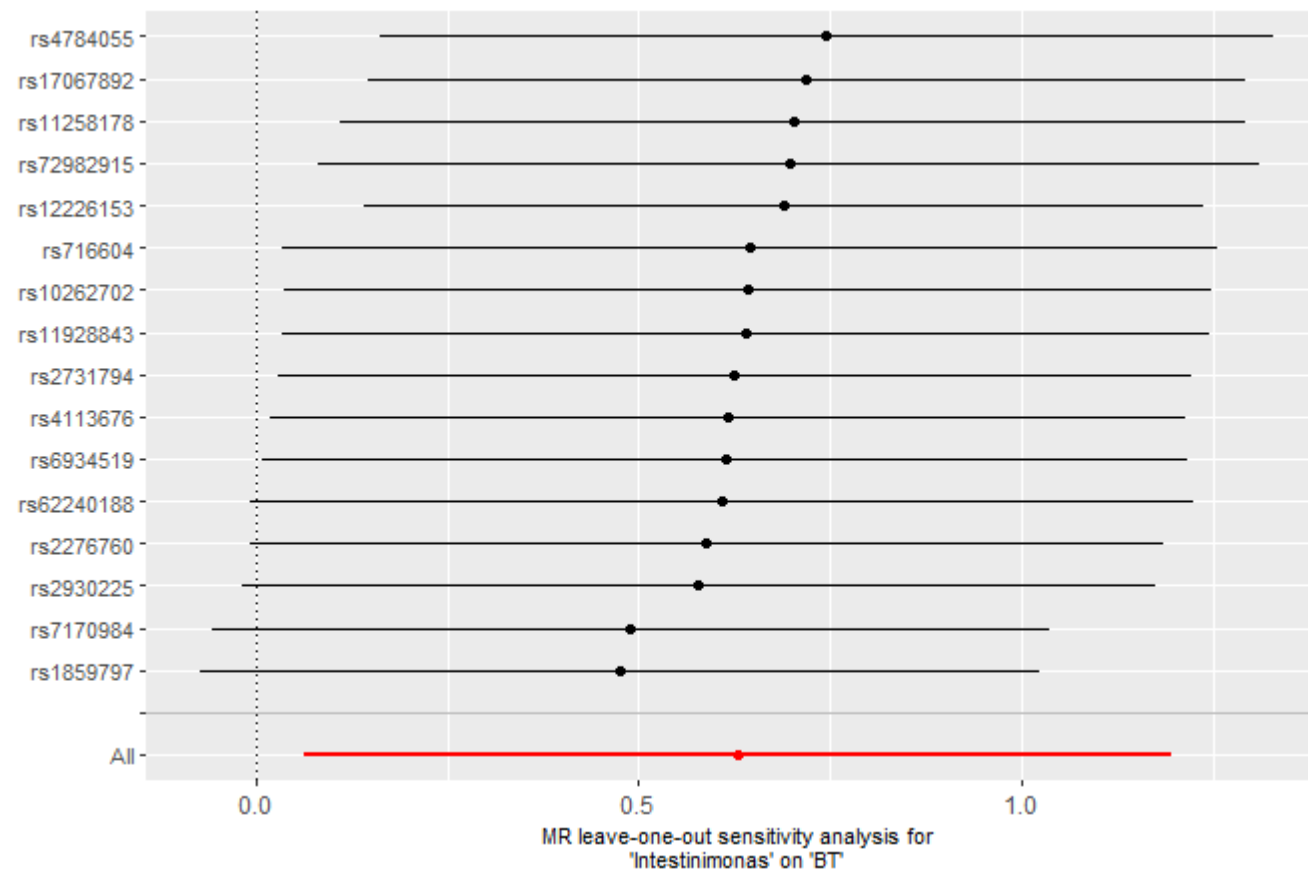

Supplement: Supplementary file 82 [file Intestinimonas PT leaveoneout.pdf › 111/Intestinimonas PT leaveoneout.pdf]

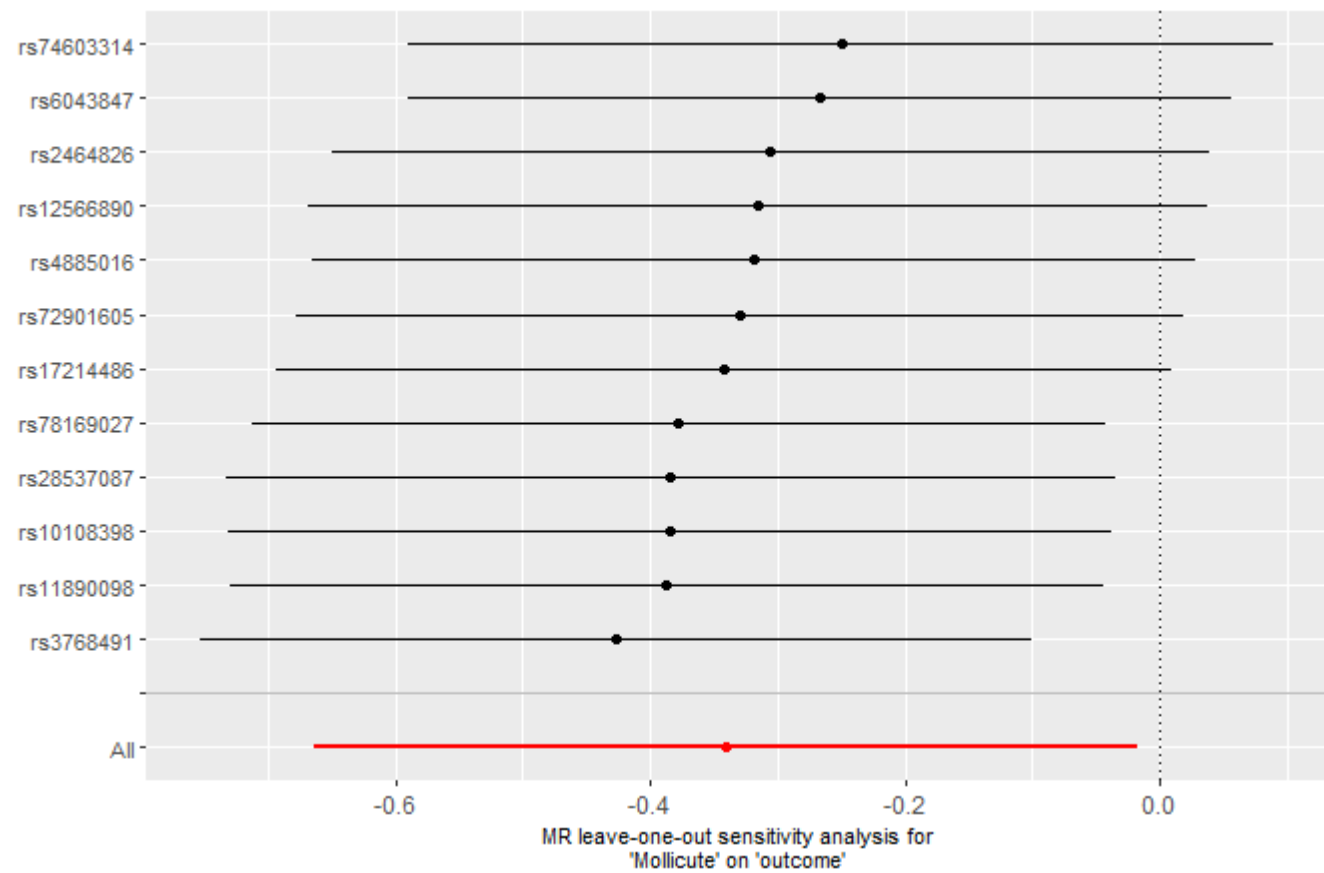

Supplement: Supplementary file 83 [file Mollicute With ST leave one out.pdf › 111/Mollicute With ST leave one out.pdf]

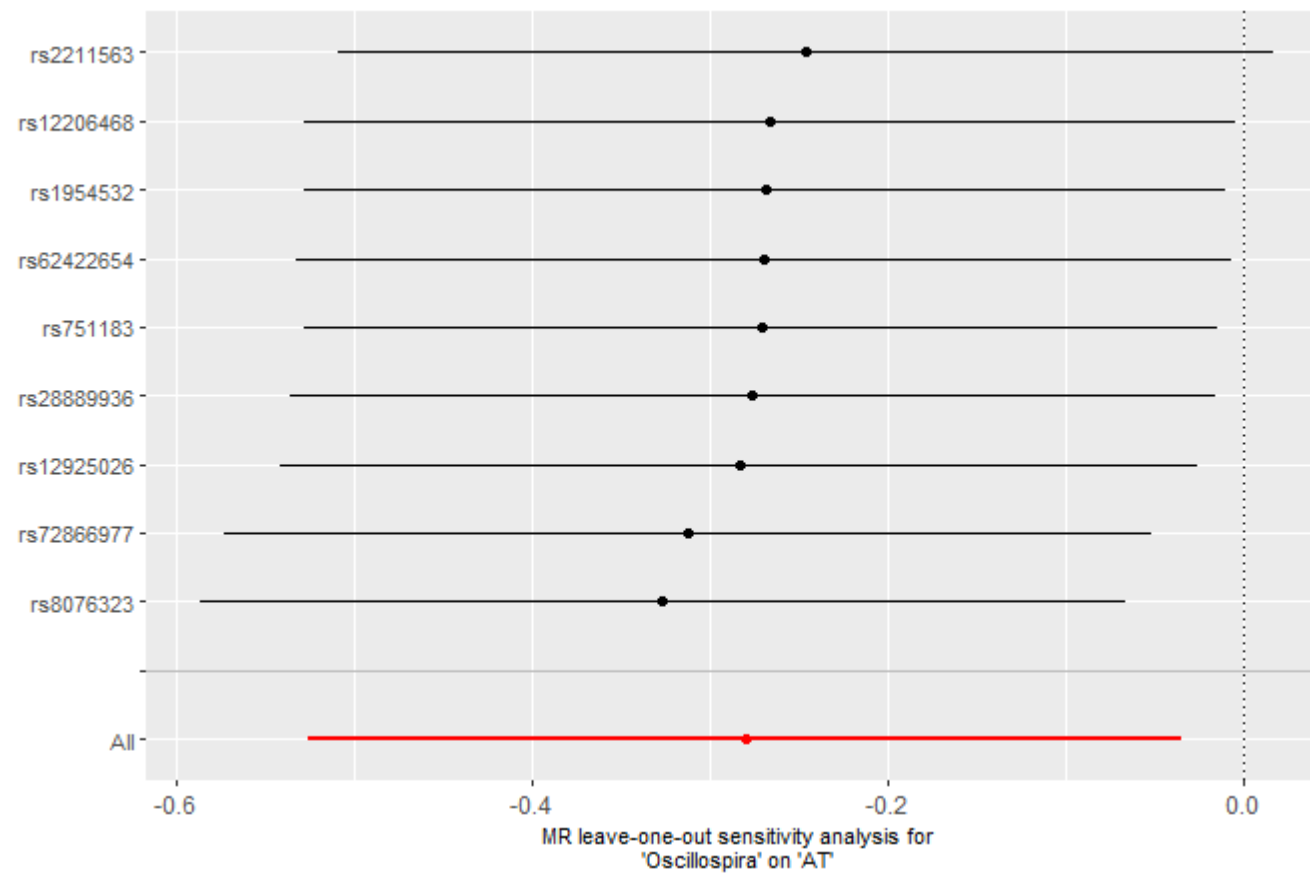

Supplement: Supplementary file 84 [file Oscillospira AT leaveoneout.pdf › 111/Oscillospira AT leaveoneout.pdf]

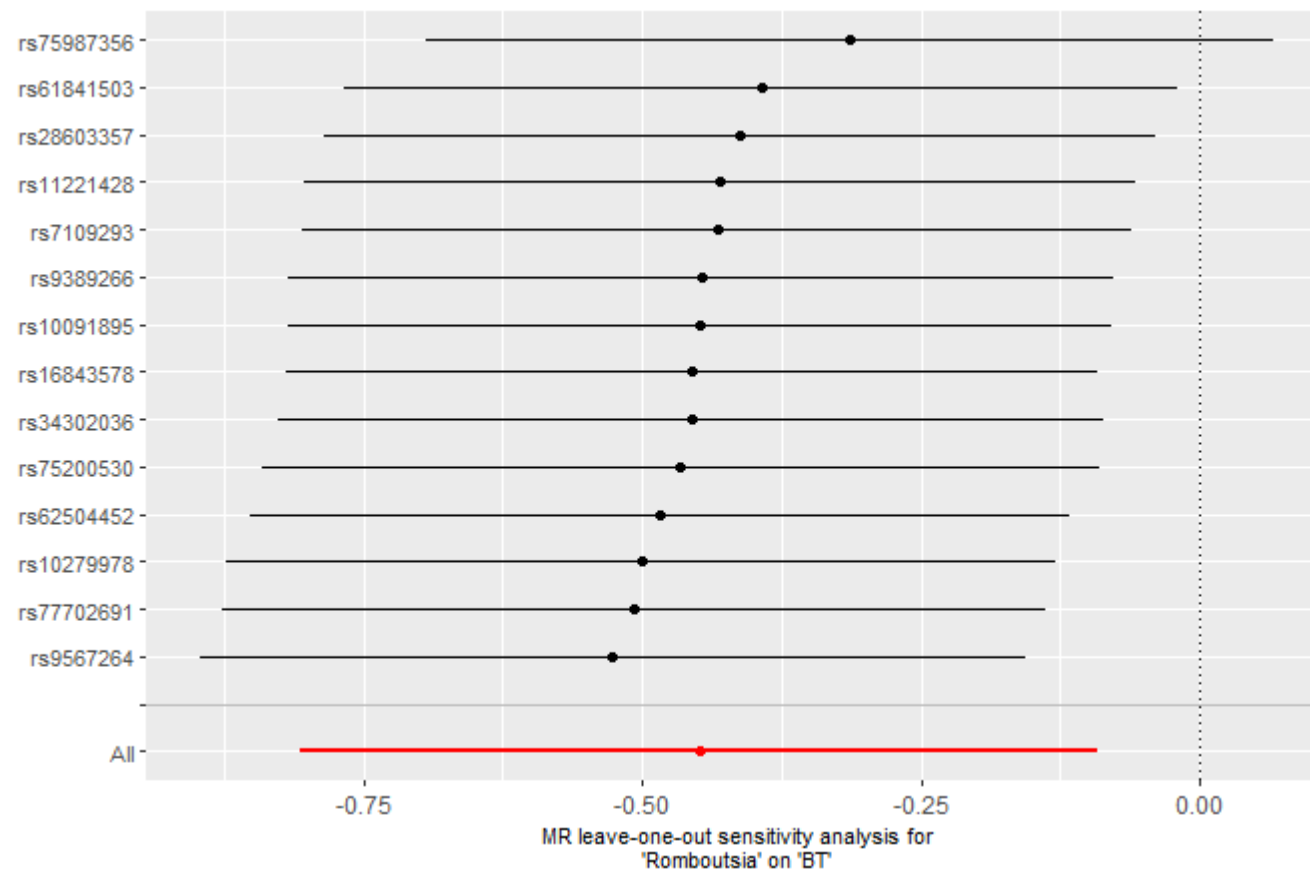

Supplement: Supplementary file 85 [file Romboutsia BT leaveoneout.pdf › 111/Romboutsia BT leaveoneout.pdf]

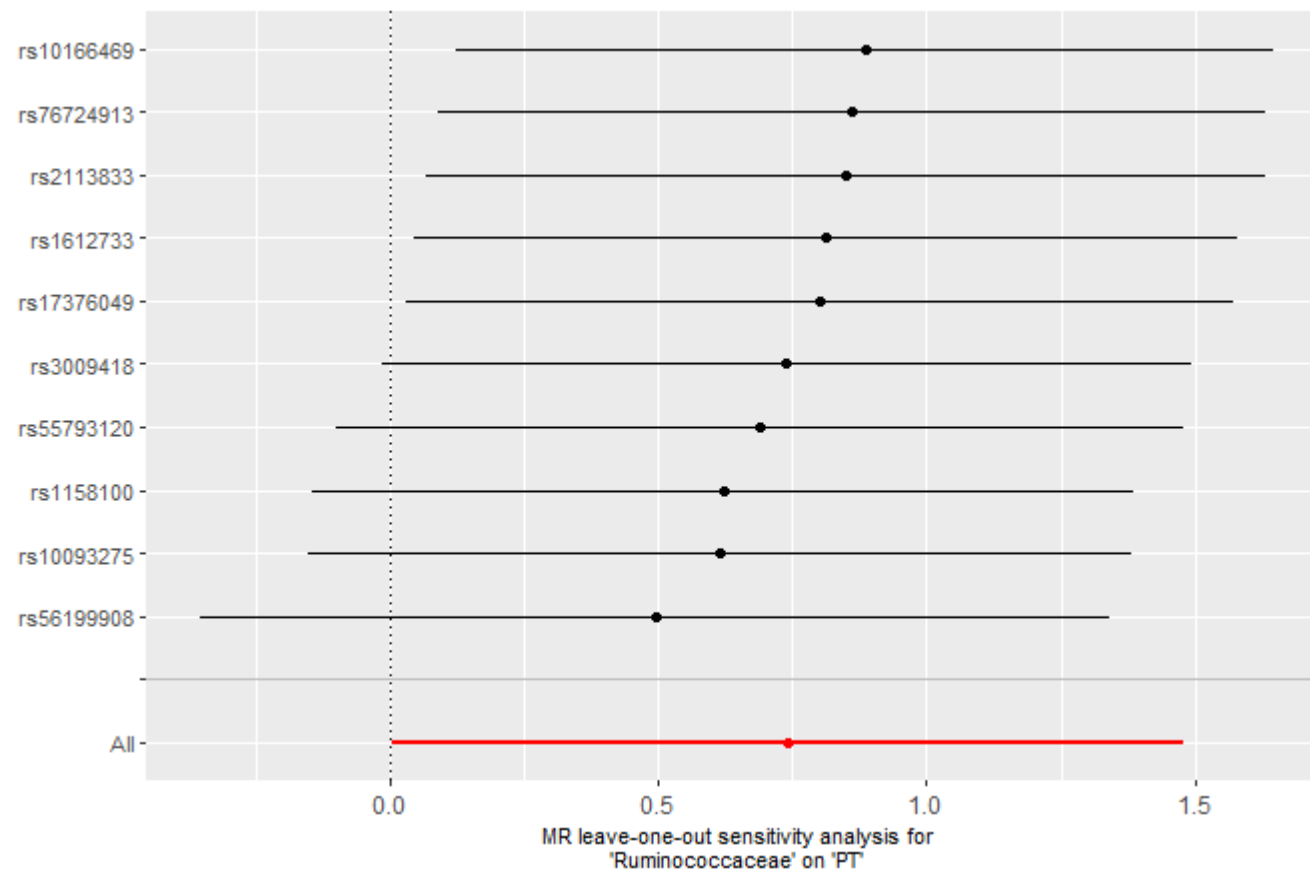

Supplement: Supplementary file 86 [file Ruminococcaceae PT leaveoneout.pdf › 111/Ruminococcaceae PT leaveoneout.pdf]

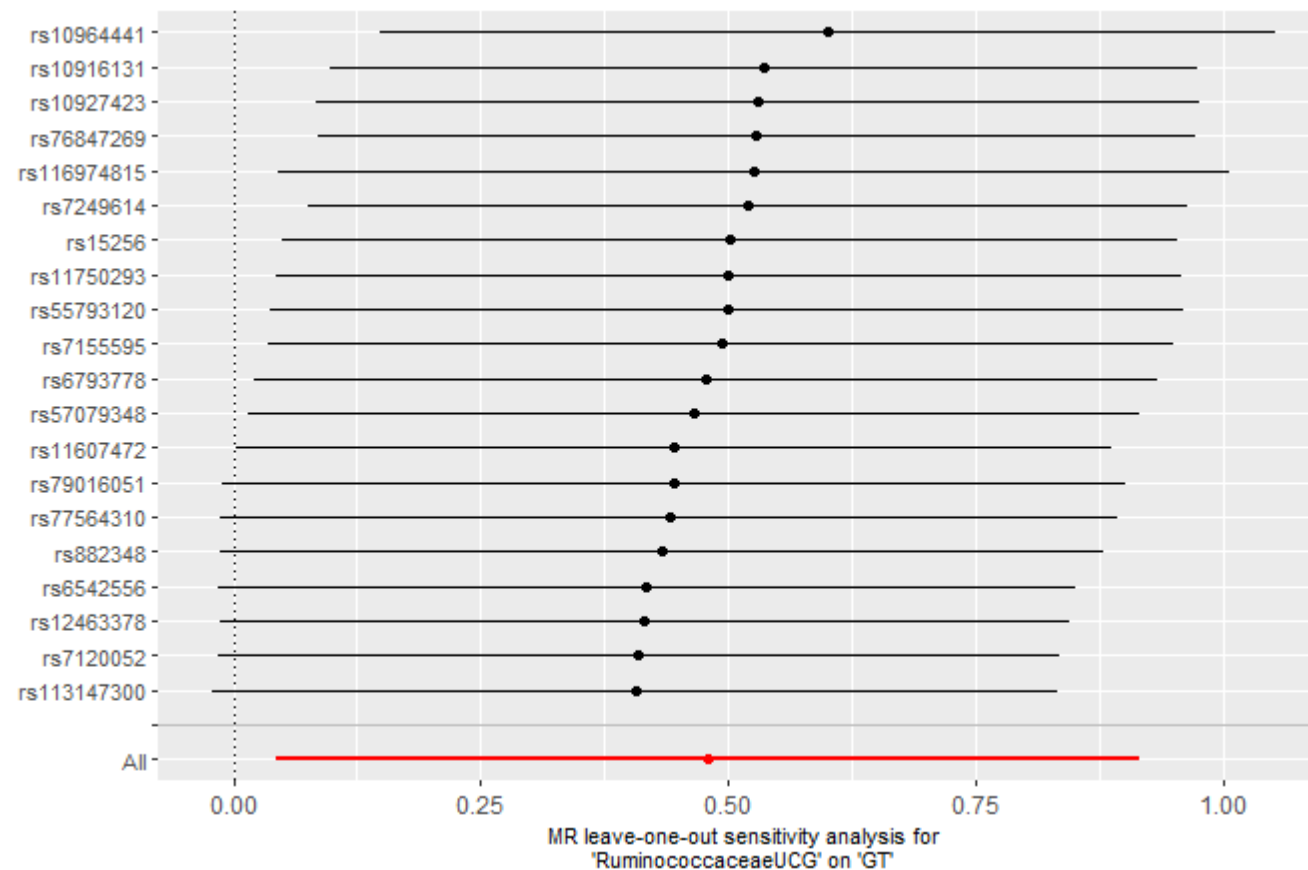

Supplement: Supplementary file 87 [file RuminococcaceaeUCG GT leaveoneout.pdf › 111/RuminococcaceaeUCG GT leaveoneout.pdf]

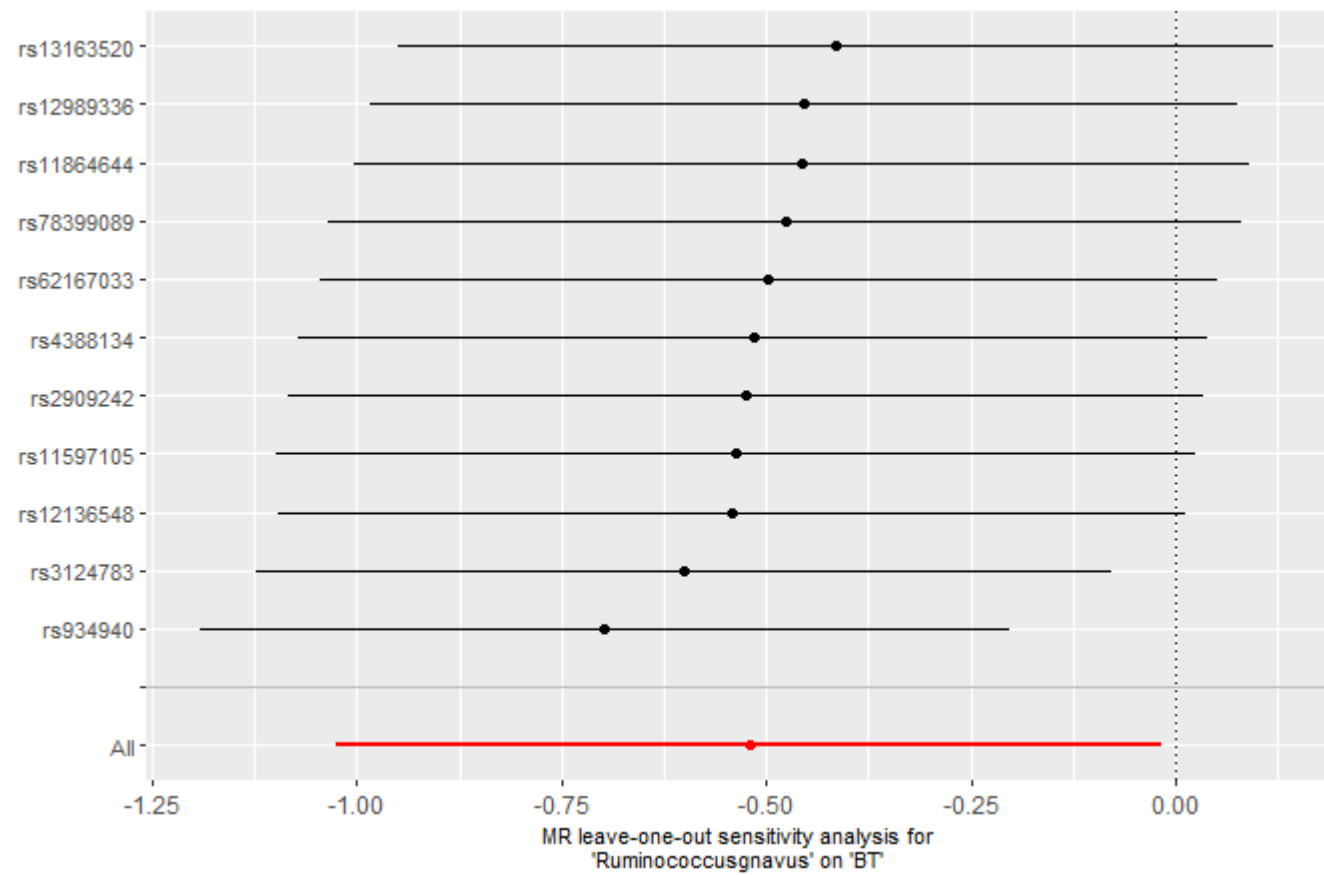

Supplement: Supplementary file 88 [file Ruminococcusgnavus PT leaveoneout.pdf › 111/Ruminococcusgnavus PT leaveoneout.pdf]

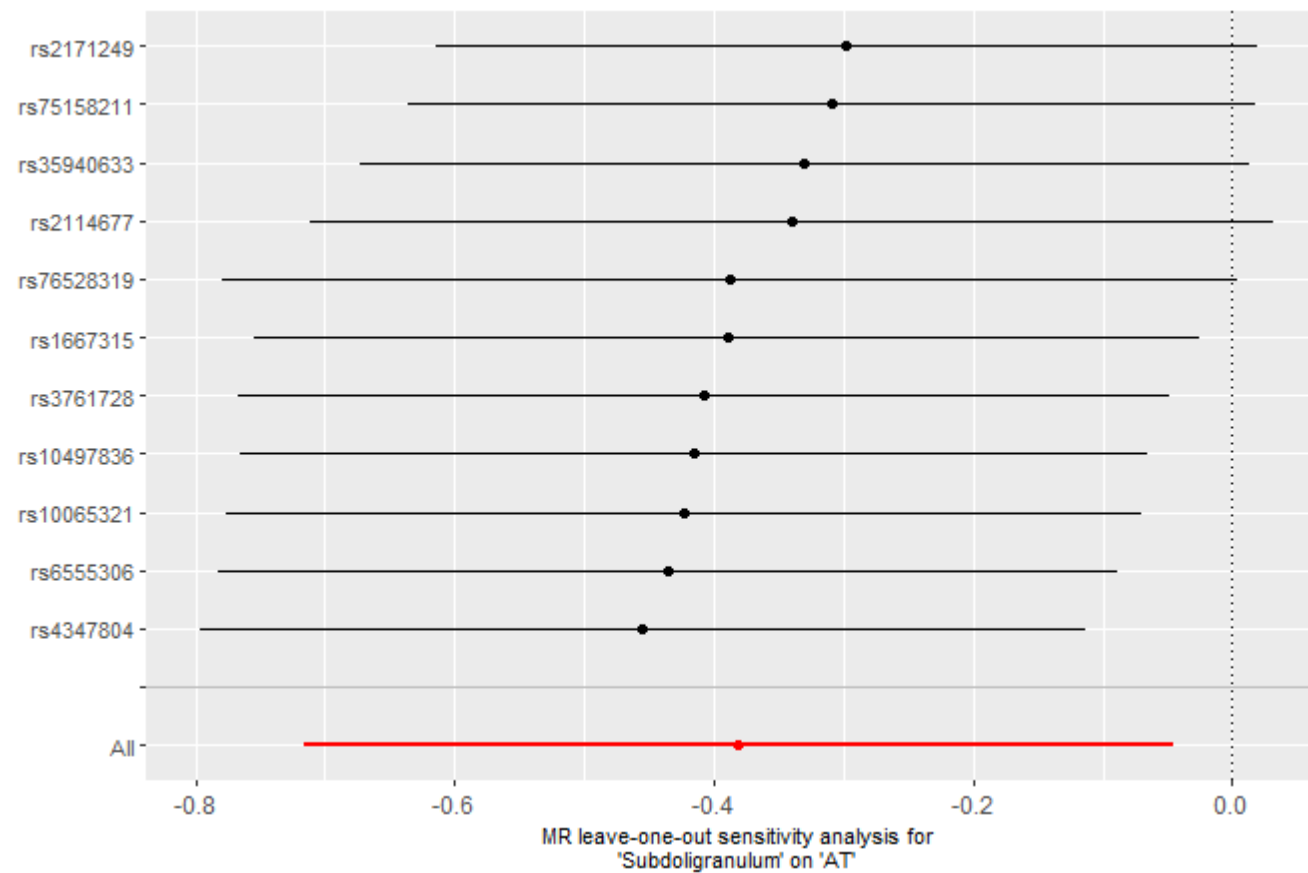

Supplement: Supplementary file 89 [file Subdoligranulum AT leaveoneout.pdf › 111/Subdoligranulum AT leaveoneout.pdf]

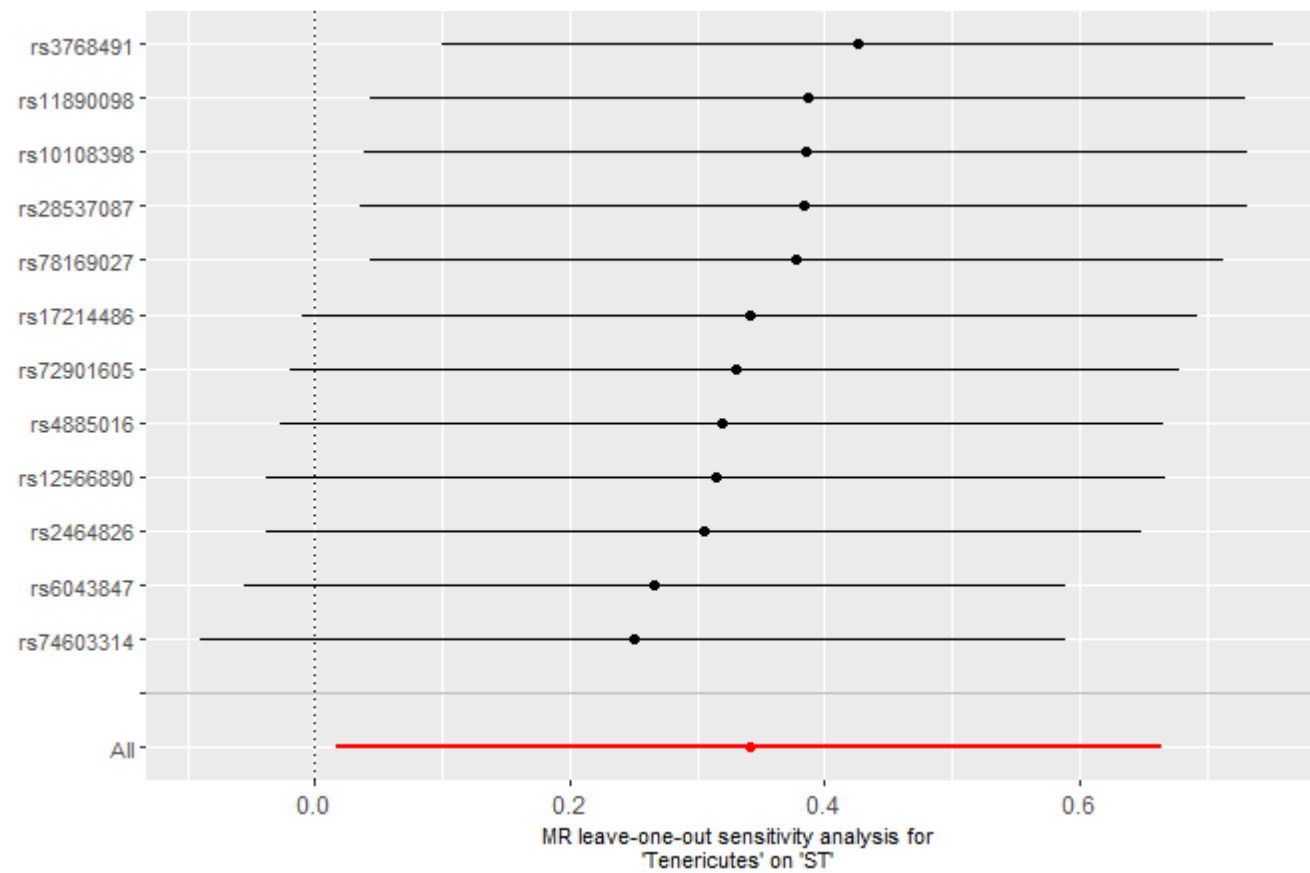

Supplement: Supplementary file 90 [file Tenericutes ST leaveoneout.pdf › 111/Tenericutes ST leaveoneout.pdf]

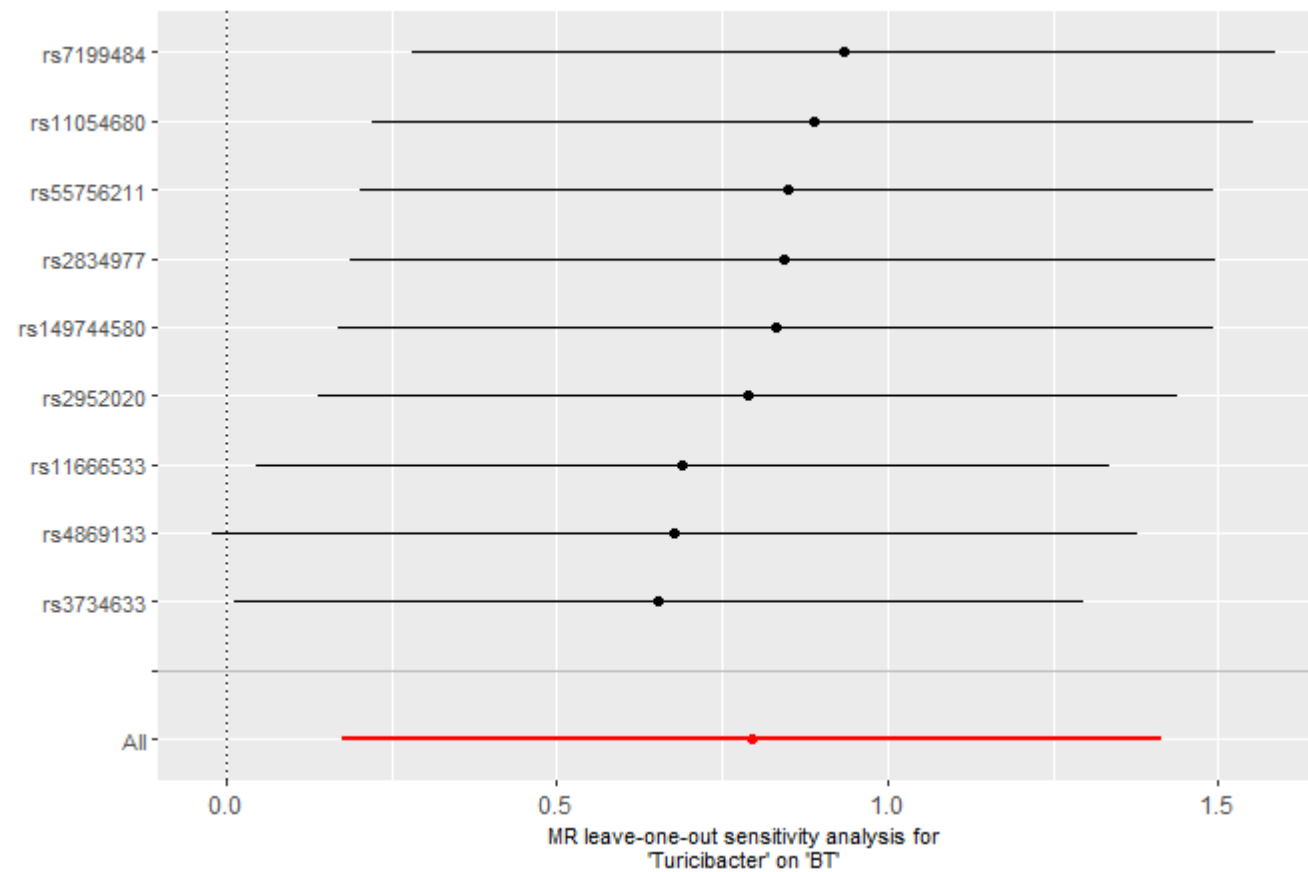

Supplement: Supplementary file 91 [file Turicibacter PT leaveoneout.pdf › 111/Turicibacter PT leaveoneout.pdf]

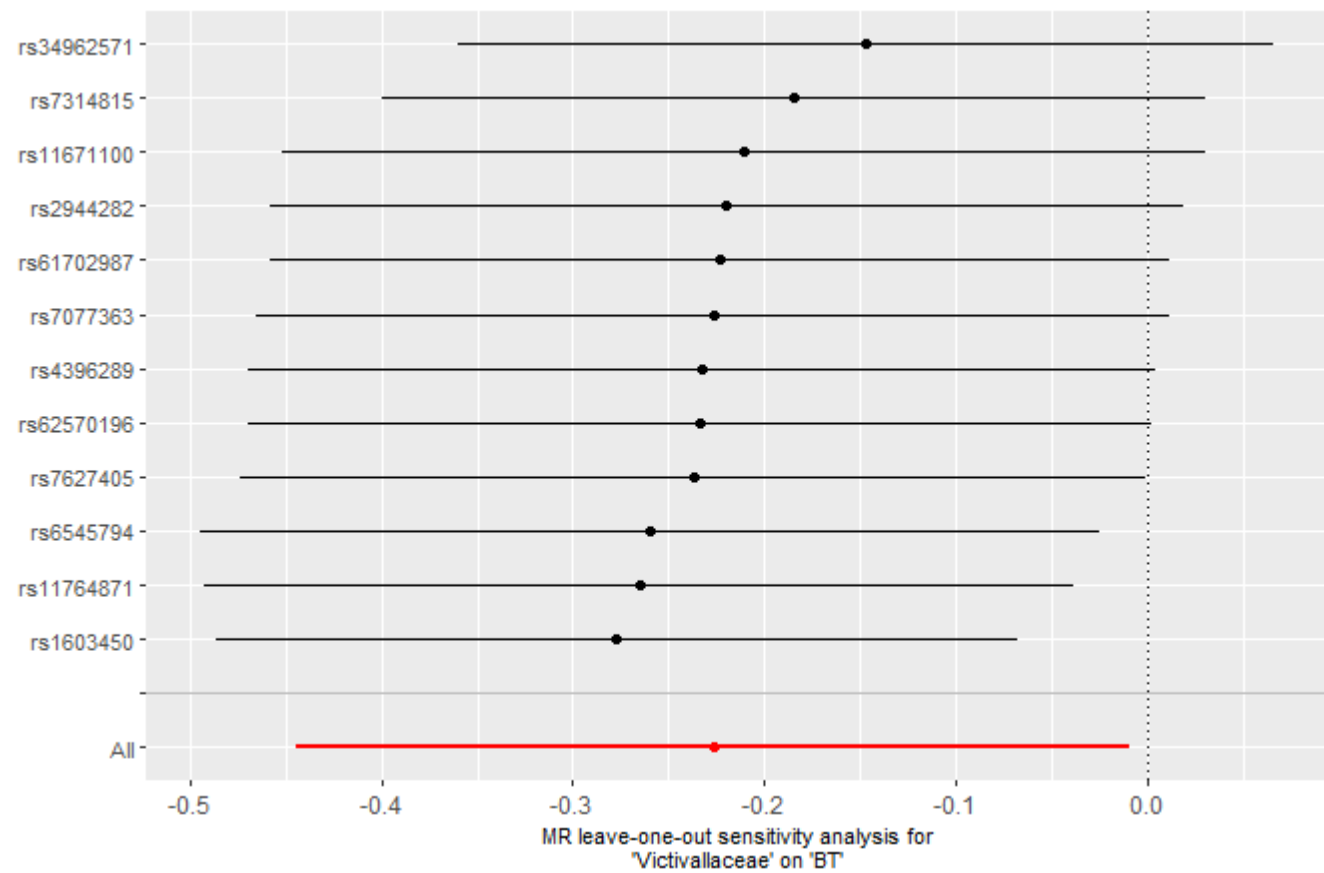

Supplement: Supplementary file 92 [file Victivallaceae BT leaveoneout.pdf › 111/Victivallaceae BT leaveoneout.pdf]

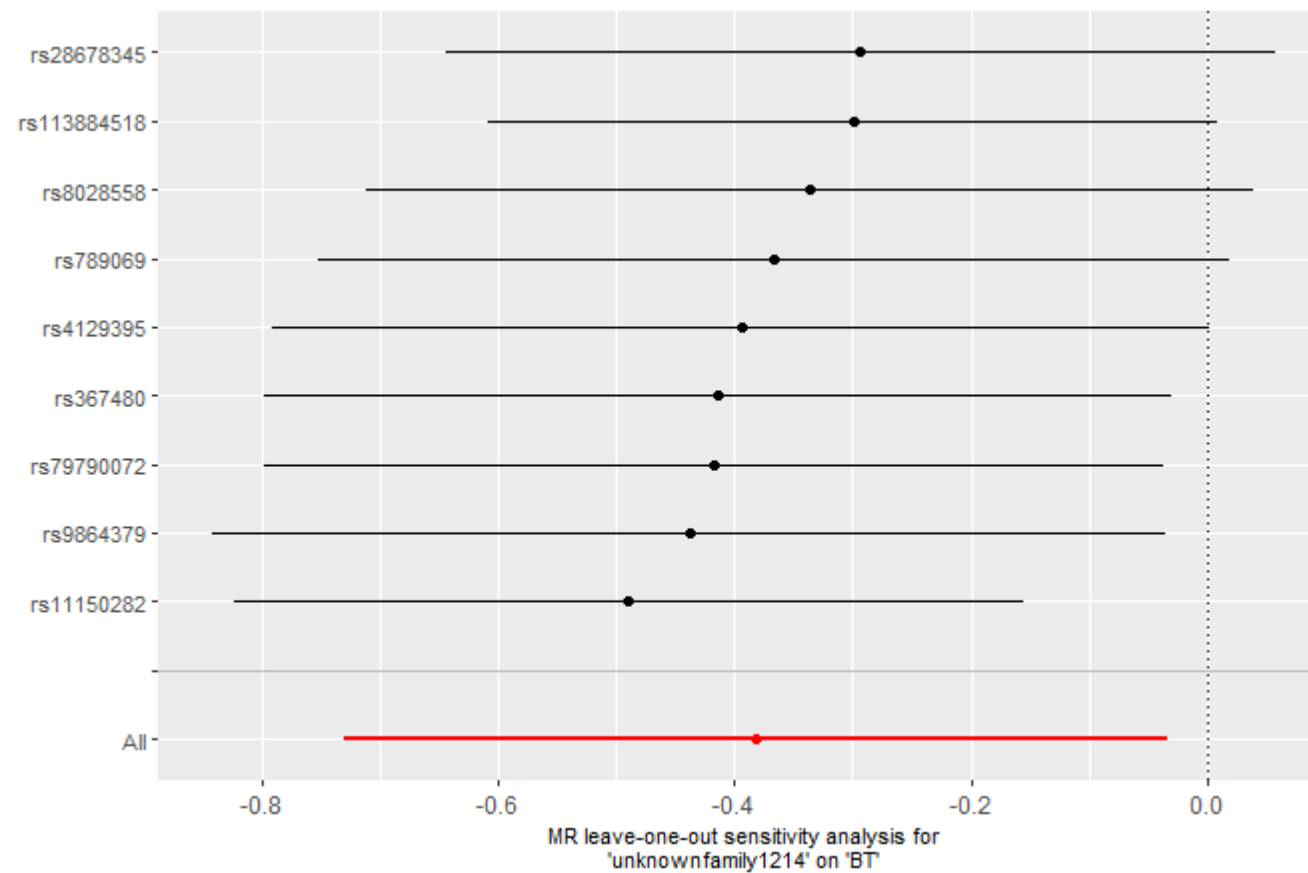

Supplement: Supplementary file 93 [file unknownfamily1214 BT leaveoneout.pdf › 111/unknownfamily1214 BT leaveoneout.pdf]

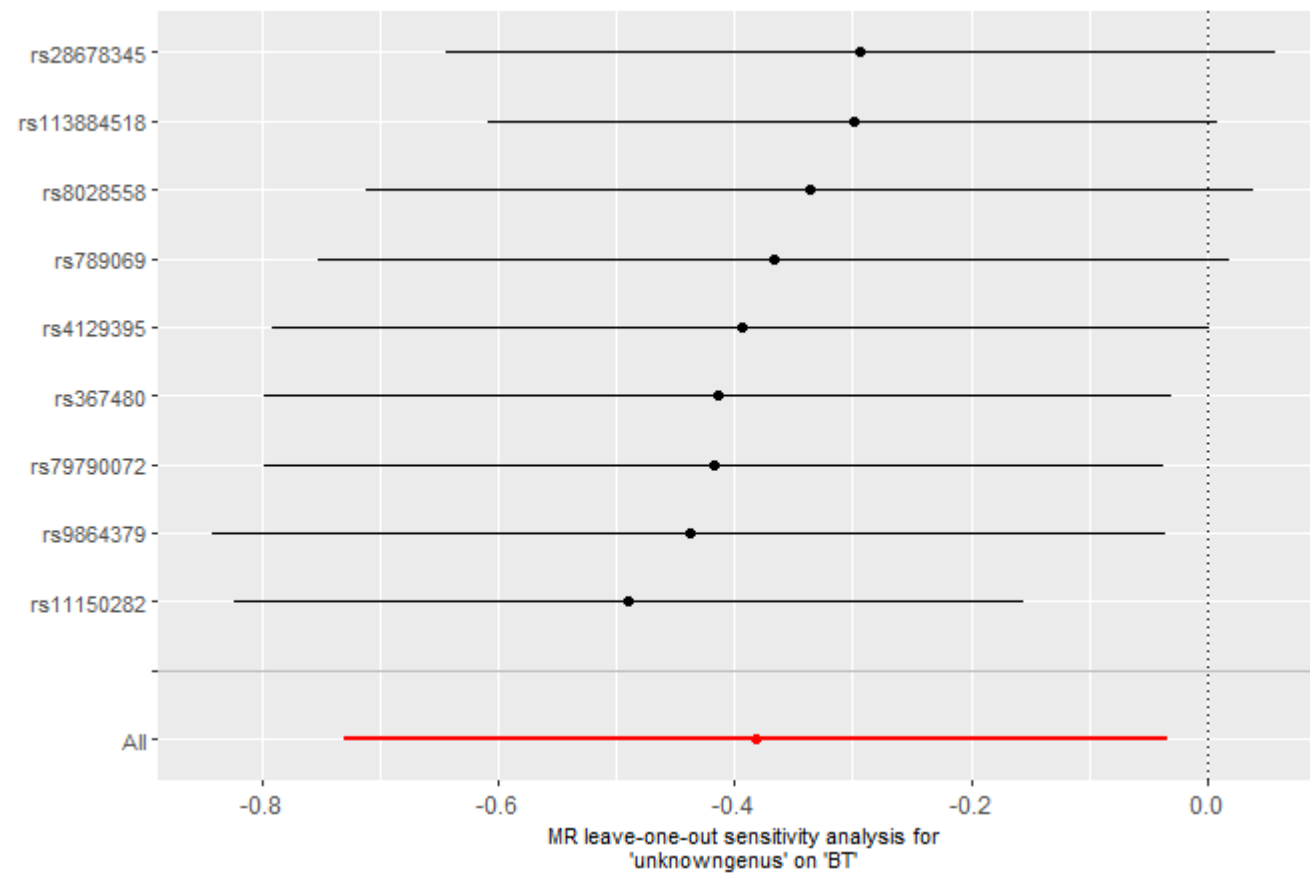

Supplement: Supplementary file 94 [file unknowngenus BT leaveoneout.pdf › 111/unknowngenus BT leaveoneout.pdf]

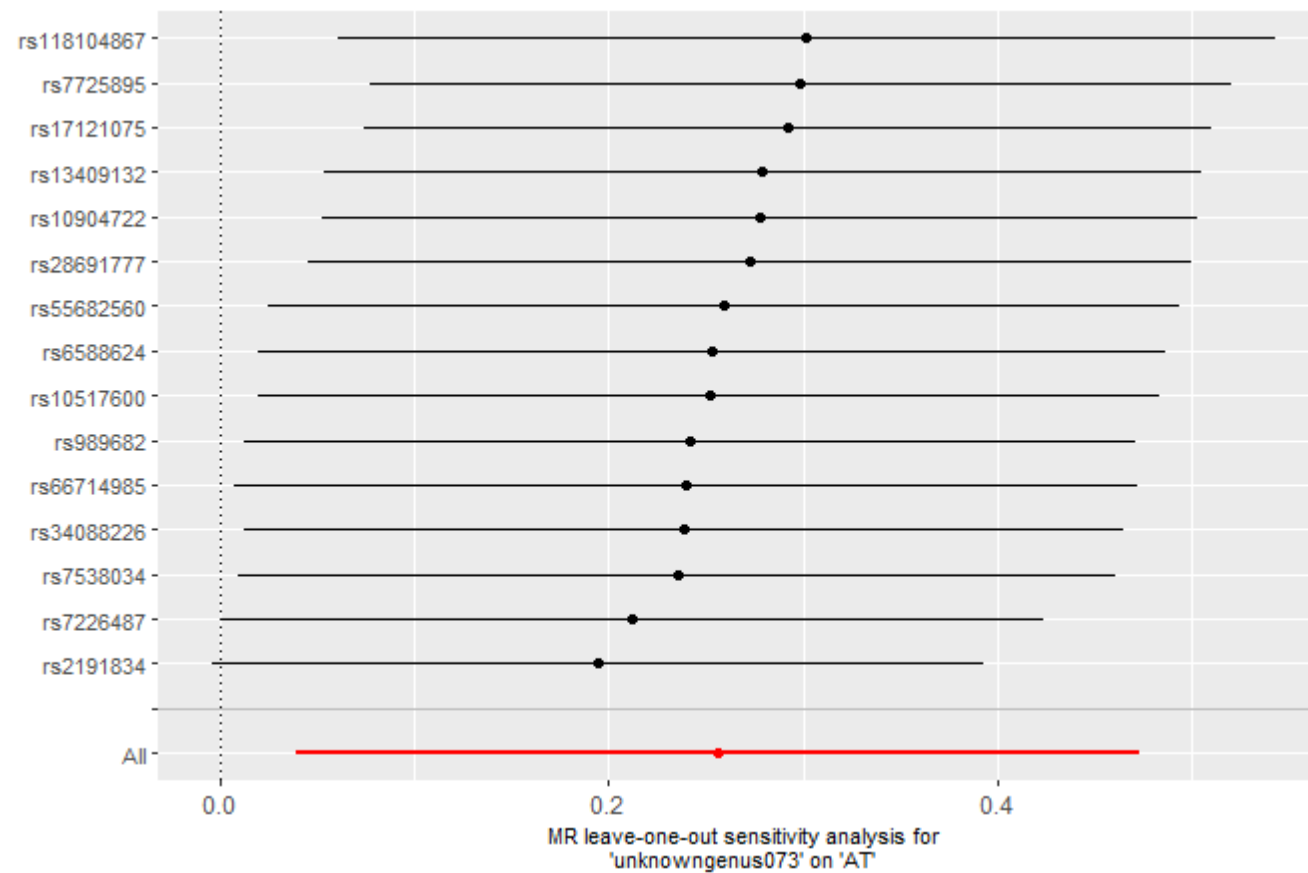

Supplement: Supplementary file 95 [file unknowngenus073 AT leaveoneout.pdf › 111/unknowngenus073 AT leaveoneout.pdf]
